# Supplementary material for: Origin of 13C NMR chemical shifts elucidated based on molecular orbital theory: paramagnetic contributions from orbital-to-orbital transitions for the pre-α, α, β, α-X, β-X and ipso-X effects, along with effects from characteristic bonds and groups
Source: Royal Society of Chemistry journal article supplement (doi:10.1039/d4ra05980h), 2025-01-01
Supplement: d4ra05980h1.pdf [file d4ra05980h1.pdf]

## Supporting Information

### **Origin of $^{13}\text{C}$ NMR chemical shifts elucidated based on molecular orbital theory: paramagnetic contributions from orbital-to-orbital transitions for the pre- $\alpha$ , $\alpha$ , $\beta$ , $\alpha$ -X, $\beta$ -X and *ipso*-X effects, along with effects from characteristic bonds and groups†**

Waro Nakanishi,\* Satoko Hayashi\* and Keigo Matsuzaki

*Faculty of Systems Engineering, Wakayama University,  
930 Sakaedani, Wakayama 640-8510, Japan.  
E-mail: nakanisi@wakayama-u.ac.jp and hayashi3@wakayama-u.ac.jp*

#### **Table of Contents Pages**

|                                                     |         |
|-----------------------------------------------------|---------|
| Additional tables and figures                       | S2–S25  |
| Computation information and geometries of compounds | S26–S44 |
| Appendix                                            | S45–S47 |

**Table S1.** The  $\sigma^t(\text{C: S})$ , and  $-\Delta\sigma^t(\text{C: S})$  and  $\delta(\text{C})_{\text{obsd}}$  for various 40 species (54 plots), calculated with the GIAO-DFT method under B3LYP/BSS-A.

| Species                        | (symmetry)                                                                |     | $\sigma^t(\text{C})$ | $-\Delta\sigma^t(\text{C})_{\text{TMS}}$ | $\delta(\text{C})_{\text{obsd}}$ |
|--------------------------------|---------------------------------------------------------------------------|-----|----------------------|------------------------------------------|----------------------------------|
| TMS                            | SiMe <sub>4</sub> ( <i>T<sub>d</sub></i> )                                |     | 182.99               | 0.00                                     | 0.0                              |
| methane                        | CH <sub>4</sub> ( <i>T<sub>d</sub></i> )                                  |     | 189.32               | -6.33                                    | -4.6                             |
| ethane                         | (CH <sub>3</sub> CH <sub>3</sub> : <i>D<sub>3d</sub></i> )                |     | 173.39               | 9.60                                     | 7.3                              |
| propane                        | CH <sub>3</sub> CH <sub>2</sub> CH <sub>3</sub> ( <i>C<sub>2v</sub></i> ) |     | 160.10               | 22.89                                    | 16.4                             |
| <i>n</i> -pentane              | <i>n</i> -C <sub>5</sub> H <sub>12</sub> ( <i>C<sub>2v</sub></i> )        |     | 140.94               | 42.05                                    | 34.8                             |
| <i>n</i> -heptane              | <i>n</i> -C <sub>7</sub> H <sub>16</sub> ( <i>C<sub>2v</sub></i> )        |     | 144.07               | 38.92                                    | 29.5                             |
| <i>n</i> -nonane               | ( <i>C<sub>2v</sub></i> )                                                 |     | 144.20               | 38.79                                    | 29.8                             |
| methylamine                    | (CH <sub>3</sub> NH <sub>2</sub> : <i>C<sub>s</sub></i> )                 |     | 150.01               | 32.98                                    | 28.4                             |
| methanol                       | (CH <sub>3</sub> OH: <i>C<sub>s</sub></i> )                               |     | 127.49               | 55.50                                    | 50.2                             |
| fluoromethane                  | (CH <sub>3</sub> F: <i>C<sub>3v</sub></i> )                               |     | 106.99               | 76.00                                    | 71.6                             |
| dimethylamine                  | Me <sub>2</sub> NH ( <i>C<sub>s</sub></i> )                               |     | 141.04               | 41.95                                    | 38.2                             |
| trimethylamine                 | Me <sub>3</sub> N ( <i>C<sub>3v</sub></i> )                               |     | 133.29               | 49.70                                    | 47.6                             |
| acetonitrile                   | MeCN ( <i>C<sub>3v</sub></i> )                                            |     | 181.70               | 1.29                                     | 1.7                              |
| methyl isocyanide              | MeNC ( <i>C<sub>3v</sub></i> )                                            |     | 156.37               | 26.62                                    | 26.8                             |
| nitromethane                   | MeNO <sub>2</sub> ( <i>C<sub>s</sub></i> )                                |     | 117.50               | 65.49                                    | 62.5                             |
| acetaldehyde                   | CH <sub>3</sub> CHO ( <i>C<sub>s</sub></i> )                              |     | 148.14               | 34.85                                    | 31.3                             |
| acetone                        | CH <sub>3</sub> COCH <sub>3</sub> ( <i>C<sub>2v</sub></i> )               |     | 151.13               | 31.86                                    | 30.9                             |
| acetic acid                    | CH <sub>3</sub> COOH ( <i>C<sub>s</sub></i> )                             |     | 162.24               | 20.75                                    | 20.8                             |
| methyl acetate                 | CH <sub>3</sub> COOCH <sub>3</sub> ( <i>C<sub>s</sub></i> )               |     | 160.82               | 22.17                                    | 20.6                             |
| methanethiol                   | CH <sub>3</sub> SH ( <i>C<sub>s</sub></i> )                               |     | 170.23               | 12.76                                    | 6.5                              |
| dimethyl sulfide               | CH <sub>3</sub> SCH <sub>3</sub> ( <i>C<sub>2v</sub></i> )                |     | 159.29               | 23.70                                    | 19.3                             |
| DMSO                           | CH <sub>3</sub> S(O)CH <sub>3</sub> ( <i>C<sub>s</sub></i> )              |     | 136.64               | 46.35                                    | 41.0                             |
| methane sulfonic acid          | CH <sub>3</sub> SO <sub>3</sub> H ( <i>C<sub>1</sub></i> )                |     | 139.67               | 43.32                                    | 39.6                             |
| chloromethane                  | CH <sub>3</sub> Cl ( <i>C<sub>3v</sub></i> )                              |     | 150.42               | 32.57                                    | 25.6                             |
| dimethyl ether                 | CH <sub>3</sub> OCH <sub>3</sub> ( <i>C<sub>2v</sub></i> )                |     | 119.08               | 63.91                                    | 60.9                             |
| methyl ethyl ether             | MeOEt ( <i>C<sub>s</sub></i> )                                            |     | 120.39               | 62.60                                    | 57.6                             |
| methyl iso-propyl ether        | MeOPr- <i>i</i> ( <i>C<sub>1</sub></i> )                                  |     | 123.55               | 59.44                                    | 54.9                             |
| methyl tert-butyl ether        | MeOBu- <i>t</i> ( <i>C<sub>s</sub></i> )                                  |     | 130.74               | 52.25                                    | 49.4                             |
| ethylene                       | CH <sub>2</sub> =CH <sub>2</sub> ( <i>D<sub>2h</sub></i> )                |     | 52.08                | 130.91                                   | 123.3                            |
| <i>trans</i> -butadiene        | <i>t</i> -CH <sub>2</sub> =CHCH=CH <sub>2</sub> ( <i>C<sub>2h</sub></i> ) | C1  | 58.69                | 124.30                                   | 117.5                            |
|                                |                                                                           | C2  | 34.39                | 148.60                                   | 137.8                            |
| <i>cis</i> -butadiene          | <i>c</i> -CH <sub>2</sub> =CHCH=CH <sub>2</sub> ( <i>C<sub>2</sub></i> )  | C1  | 58.85                | 124.14                                   | 117.5                            |
|                                |                                                                           | C2  | 34.12                | 148.87                                   | 137.8                            |
| propylene                      | CH <sub>2</sub> =CHCH <sub>3</sub> ( <i>C<sub>s</sub></i> )               | C1  | 37.20                | 145.79                                   | 140.2                            |
|                                |                                                                           | C2  | 61.63                | 121.36                                   | 115.7                            |
|                                |                                                                           |     | 159.86               | 23.13                                    | 24.2                             |
| vinyl alcohol                  | CH <sub>2</sub> =CHOH ( <i>C<sub>s</sub></i> )                            | C1  | 26.57                | 156.42                                   | 149.0                            |
|                                |                                                                           | C2  | 89.96                | 93.03                                    | 88.0                             |
| methyl vinyl ether             | CH <sub>2</sub> =CHOMe ( <i>C<sub>s</sub></i> )                           | C1  | 19.36                | 163.63                                   | 152.9                            |
|                                |                                                                           | C2  | 97.51                | 85.48                                    | 85.5                             |
| acrolein                       | CH <sub>2</sub> =CHCHO ( <i>C<sub>s</sub></i> )                           | C4  | 33.08                | 149.91                                   | 138.5                            |
|                                |                                                                           | C1  | 37.88                | 145.11                                   | 138.0                            |
| methyl vinyl ketone            | CH <sub>2</sub> =CHCOCH <sub>3</sub> ( <i>C<sub>s</sub></i> )             | C4  | 33.38                | 149.61                                   | 137.5                            |
|                                |                                                                           | C1  | 48.01                | 134.98                                   | 129.0                            |
| <i>cis</i> -acrylic acid       | <i>c</i> -CH <sub>2</sub> =CHCOOH ( <i>C<sub>s</sub></i> )                | C4  | 47.71                | 135.28                                   | 128.1                            |
|                                |                                                                           | C1  | 40.18                | 142.81                                   | 133.2                            |
| <i>trans</i> -acrylic acid     | <i>t</i> -CH <sub>2</sub> =CHCOOH ( <i>C<sub>s</sub></i> )                | C2  | 44.90                | 138.09                                   | 128.1                            |
|                                |                                                                           | C1  | 43.00                | 139.99                                   | 133.2                            |
| nitroethylene                  | CH <sub>2</sub> =CHNO <sub>2</sub> ( <i>C<sub>s</sub></i> )               | C4  | 26.55                | 156.44                                   | 144.7                            |
|                                |                                                                           | C1  | 53.02                | 129.97                                   | 121.5                            |
| isocyanoethylene               | CH <sub>2</sub> =CHNC ( <i>C<sub>s</sub></i> )                            | C1  | 55.11                | 127.88                                   | 121.0                            |
|                                |                                                                           | C4  | 56.04                | 126.95                                   | 119.3                            |
| <i>N,N</i> -dimethylethenamine | ( <i>C<sub>1</sub></i> )                                                  | C13 | 166.61               | 16.38                                    | 12.8                             |
|                                |                                                                           | C10 | 124.24               | 58.75                                    | 53.6                             |
|                                |                                                                           | C1  | 138.89               | 44.10                                    | 44.6                             |

**Table S2.** The  $\sigma^t(\text{C: S})$ , and  $-\Delta\sigma^t(\text{C: S})$  and  $\delta(\text{C})_{\text{obsd}}$  for various 40 species (54 plots), calculated with the GIAO-DFT method under CAM-B3LYP/BSS-A.

| Species                        | (symmetry)                                                                |     | $\sigma^t(\text{C})$ | $-\Delta\sigma^t(\text{C})_{\text{TMS}}$ | $\delta(\text{C})_{\text{obsd}}$ |
|--------------------------------|---------------------------------------------------------------------------|-----|----------------------|------------------------------------------|----------------------------------|
| TMS                            | SiMe <sub>4</sub> ( <i>T<sub>d</sub></i> )                                |     | 186.63               | 0.00                                     | 0.0                              |
| methane                        | CH <sub>4</sub> ( <i>T<sub>d</sub></i> )                                  |     | 192.76               | -6.13                                    | -4.6                             |
| ethane                         | (CH <sub>3</sub> CH <sub>3</sub> : <i>D<sub>3d</sub></i> )                |     | 177.83               | 8.80                                     | 7.3                              |
| propane                        | CH <sub>3</sub> CH <sub>2</sub> CH <sub>3</sub> ( <i>C<sub>2v</sub></i> ) |     | 165.50               | 21.13                                    | 16.4                             |
| <i>n</i> -pentane              | <i>n</i> -C <sub>5</sub> H <sub>12</sub> ( <i>C<sub>2v</sub></i> )        |     | 145.62               | 41.01                                    | 34.8                             |
| <i>n</i> -heptane              | <i>n</i> -C <sub>7</sub> H <sub>16</sub> ( <i>C<sub>2v</sub></i> )        |     | 148.90               | 37.73                                    | 29.5                             |
| <i>n</i> -nonane               | ( <i>C<sub>2v</sub></i> )                                                 |     | 149.00               | 37.63                                    | 29.8                             |
| methylamine                    | (CH <sub>3</sub> NH <sub>2</sub> : <i>C<sub>s</sub></i> )                 |     | 154.83               | 31.80                                    | 28.4                             |
| methanol                       | (CH <sub>3</sub> OH: <i>C<sub>s</sub></i> )                               |     | 131.95               | 54.67                                    | 50.2                             |
| fluoromethane                  | (CH <sub>3</sub> F: <i>C<sub>3v</sub></i> )                               |     | 110.87               | 75.76                                    | 71.6                             |
| dimethylamine                  | Me <sub>2</sub> NH ( <i>C<sub>s</sub></i> )                               |     | 145.61               | 41.02                                    | 38.2                             |
| trimethylamine                 | Me <sub>3</sub> N ( <i>C<sub>3v</sub></i> )                               |     | 137.49               | 49.14                                    | 47.6                             |
| acetonitrile                   | MeCN ( <i>C<sub>3v</sub></i> )                                            |     | 186.01               | 0.62                                     | 1.7                              |
| methyl isocyanide              | MeNC ( <i>C<sub>3v</sub></i> )                                            |     | 160.55               | 26.08                                    | 26.8                             |
| nitromethane                   | MeNO <sub>2</sub> ( <i>C<sub>s</sub></i> )                                |     | 121.34               | 65.29                                    | 62.5                             |
| acetaldehyde                   | CH <sub>3</sub> CHO ( <i>C<sub>s</sub></i> )                              |     | 151.71               | 34.91                                    | 31.3                             |
| acetone                        | CH <sub>3</sub> COCH <sub>3</sub> ( <i>C<sub>2v</sub></i> )               |     | 154.35               | 32.28                                    | 30.9                             |
| acetic acid                    | CH <sub>3</sub> COOH ( <i>C<sub>s</sub></i> )                             |     | 165.68               | 20.95                                    | 20.8                             |
| methyl acetate                 | CH <sub>3</sub> COOCH <sub>3</sub> ( <i>C<sub>s</sub></i> )               |     | 164.24               | 22.39                                    | 20.6                             |
| methanethiol                   | CH <sub>3</sub> SH ( <i>C<sub>s</sub></i> )                               |     | 176.13               | 10.50                                    | 6.5                              |
| dimethyl sulfide               | CH <sub>3</sub> SCH <sub>3</sub> ( <i>C<sub>2v</sub></i> )                |     | 164.74               | 21.89                                    | 19.3                             |
| DMSO                           | CH <sub>3</sub> S(O)CH <sub>3</sub> ( <i>C<sub>s</sub></i> )              |     | 146.86               | 39.77                                    | 41.0                             |
| methane sulfonic acid          | CH <sub>3</sub> SO <sub>3</sub> H ( <i>C<sub>1</sub></i> )                |     | 147.15               | 39.48                                    | 39.6                             |
| chloromethane                  | CH <sub>3</sub> Cl ( <i>C<sub>3v</sub></i> )                              |     | 156.74               | 29.89                                    | 25.6                             |
| dimethyl ether                 | CH <sub>3</sub> OCH <sub>3</sub> ( <i>C<sub>2v</sub></i> )                |     | 123.44               | 63.19                                    | 60.9                             |
| methyl ethyl ether             | MeOEt ( <i>C<sub>s</sub></i> )                                            |     | 124.81               | 61.82                                    | 57.6                             |
| methyl iso-propyl ether        | MeOPr- <i>i</i> ( <i>C<sub>1</sub></i> )                                  |     | 138.12               | 48.51                                    | 54.9                             |
| methyl tert-butyl ether        | MeOBu- <i>t</i> ( <i>C<sub>s</sub></i> )                                  |     | 135.32               | 51.31                                    | 49.4                             |
| ethylene                       | CH <sub>2</sub> =CH <sub>2</sub> ( <i>D<sub>2h</sub></i> )                |     | 53.26                | 133.36                                   | 123.3                            |
| <i>trans</i> -butadiene        | <i>t</i> -CH <sub>2</sub> =CHCH=CH <sub>2</sub> ( <i>C<sub>2h</sub></i> ) | C1  | 60.30                | 126.32                                   | 117.5                            |
|                                |                                                                           | C2  | 35.87                | 150.76                                   | 137.8                            |
| <i>cis</i> -butadiene          | <i>c</i> -CH <sub>2</sub> =CHCH=CH <sub>2</sub> ( <i>C<sub>2</sub></i> )  | C1  | 63.19                | 123.43                                   | 117.5                            |
|                                |                                                                           | C2  | 37.91                | 148.72                                   | 137.8                            |
| propylene                      | CH <sub>2</sub> =CHCH <sub>3</sub> ( <i>C<sub>s</sub></i> )               | C1  | 38.98                | 147.64                                   | 140.2                            |
|                                |                                                                           | C2  | 63.02                | 123.61                                   | 115.7                            |
|                                |                                                                           |     | 164.24               | 22.39                                    | 24.2                             |
| vinyl alcohol                  | CH <sub>2</sub> =CHOH ( <i>C<sub>s</sub></i> )                            | C1  | 28.47                | 158.16                                   | 149.0                            |
|                                |                                                                           | C2  | 91.34                | 95.28                                    | 88.0                             |
| methyl vinyl ether             | CH <sub>2</sub> =CHOMe ( <i>C<sub>s</sub></i> )                           | C1  | 20.90                | 165.73                                   | 152.9                            |
|                                |                                                                           | C2  | 99.08                | 87.54                                    | 85.5                             |
| acrolein                       | CH <sub>2</sub> =CHCHO ( <i>C<sub>s</sub></i> )                           | C4  | 34.68                | 151.94                                   | 138.5                            |
|                                |                                                                           | C1  | 39.88                | 146.75                                   | 138.0                            |
| methyl vinyl ketone            | CH <sub>2</sub> =CHCOCH <sub>3</sub> ( <i>C<sub>s</sub></i> )             | C4  | 34.90                | 151.73                                   | 137.5                            |
|                                |                                                                           | C1  | 49.45                | 137.18                                   | 129.0                            |
| <i>cis</i> -acrylic acid       | <i>c</i> -CH <sub>2</sub> =CHCOOH ( <i>C<sub>s</sub></i> )                | C4  | 49.77                | 136.86                                   | 128.1                            |
|                                |                                                                           | C1  | 41.19                | 145.43                                   | 133.2                            |
| <i>trans</i> -acrylic acid     | <i>t</i> -CH <sub>2</sub> =CHCOOH ( <i>C<sub>s</sub></i> )                | C2  | 46.89                | 139.74                                   | 128.1                            |
|                                |                                                                           | C1  | 44.06                | 142.57                                   | 133.2                            |
| nitroethylene                  | CH <sub>2</sub> =CHNO <sub>2</sub> ( <i>C<sub>s</sub></i> )               | C4  | 29.43                | 157.20                                   | 144.7                            |
|                                |                                                                           | C1  | 53.94                | 132.69                                   | 121.5                            |
| isocyanoethylene               | CH <sub>2</sub> =CHNC ( <i>C<sub>s</sub></i> )                            | C1  | 57.65                | 128.98                                   | 121.0                            |
|                                |                                                                           | C4  | 56.11                | 130.52                                   | 119.3                            |
| <i>N,N</i> -dimethylethenamine | ( <i>C<sub>1</sub></i> )                                                  | C13 | 170.66               | 15.96                                    | 12.8                             |
|                                |                                                                           | C10 | 129.33               | 57.30                                    | 53.6                             |
|                                |                                                                           | C1  | 136.45               | 50.18                                    | 44.6                             |

**Table S3.** The  $\sigma^t(\text{C: S})$ , and  $-\Delta\sigma^t(\text{C: S})$  and  $\delta(\text{C})_{\text{obsd}}$  for various 40 species (54 plots), calculated with the GIAO-DFT method under PBE/BSS-A.

| Species                        | (symmetry)                                                                |     | $\sigma^t(\text{C})$ | $-\Delta\sigma^t(\text{C})_{\text{TMS}}$ | $\delta(\text{C})_{\text{obsd}}$ |
|--------------------------------|---------------------------------------------------------------------------|-----|----------------------|------------------------------------------|----------------------------------|
| TMS                            | SiMe <sub>4</sub> ( <i>T<sub>d</sub></i> )                                |     | 181.82               | 0.00                                     | 0.0                              |
| methane                        | CH <sub>4</sub> ( <i>T<sub>d</sub></i> )                                  |     | 189.44               | -7.62                                    | -4.6                             |
| ethane                         | (CH <sub>3</sub> CH <sub>3</sub> : <i>D<sub>3d</sub></i> )                |     | 172.53               | 9.29                                     | 7.3                              |
| propane                        | CH <sub>3</sub> CH <sub>2</sub> CH <sub>3</sub> ( <i>C<sub>2v</sub></i> ) |     | 158.68               | 23.14                                    | 16.4                             |
| <i>n</i> -pentane              | <i>n</i> -C <sub>5</sub> H <sub>12</sub> ( <i>C<sub>2v</sub></i> )        |     | 138.77               | 43.05                                    | 34.8                             |
| <i>n</i> -heptane              | <i>n</i> -C <sub>7</sub> H <sub>16</sub> ( <i>C<sub>2v</sub></i> )        |     | 142.18               | 39.64                                    | 29.5                             |
| <i>n</i> -nonane               | ( <i>C<sub>2v</sub></i> )                                                 |     | 142.31               | 39.51                                    | 29.8                             |
| methylamine                    | (CH <sub>3</sub> NH <sub>2</sub> : <i>C<sub>s</sub></i> )                 |     | 148.22               | 33.60                                    | 28.4                             |
| methanol                       | (CH <sub>3</sub> OH: <i>C<sub>s</sub></i> )                               |     | 125.11               | 56.71                                    | 50.2                             |
| fluoromethane                  | (CH <sub>3</sub> F: <i>C<sub>3v</sub></i> )                               |     | 104.13               | 77.69                                    | 71.6                             |
| dimethylamine                  | Me <sub>2</sub> NH ( <i>C<sub>s</sub></i> )                               |     | 138.76               | 43.06                                    | 38.2                             |
| trimethylamine                 | Me <sub>3</sub> N ( <i>C<sub>3v</sub></i> )                               |     | 130.83               | 50.99                                    | 47.6                             |
| acetonitrile                   | MeCN ( <i>C<sub>3v</sub></i> )                                            |     | 180.44               | 1.38                                     | 1.7                              |
| methyl isocyanide              | MeNC ( <i>C<sub>3v</sub></i> )                                            |     | 155.55               | 26.27                                    | 26.8                             |
| nitromethane                   | MeNO <sub>2</sub> ( <i>C<sub>s</sub></i> )                                |     | 116.56               | 65.26                                    | 62.5                             |
| acetaldehyde                   | CH <sub>3</sub> CHO ( <i>C<sub>s</sub></i> )                              |     | 146.41               | 35.42                                    | 31.3                             |
| acetone                        | CH <sub>3</sub> COCH <sub>3</sub> ( <i>C<sub>2v</sub></i> )               |     | 149.84               | 31.99                                    | 30.9                             |
| acetic acid                    | CH <sub>3</sub> COOH ( <i>C<sub>s</sub></i> )                             |     | 161.93               | 19.89                                    | 20.8                             |
| methyl acetate                 | CH <sub>3</sub> COOCH <sub>3</sub> ( <i>C<sub>s</sub></i> )               |     | 160.59               | 21.23                                    | 20.6                             |
| methanethiol                   | CH <sub>3</sub> SH ( <i>C<sub>s</sub></i> )                               |     | 169.38               | 12.45                                    | 6.5                              |
| dimethyl sulfide               | CH <sub>3</sub> SCH <sub>3</sub> ( <i>C<sub>2v</sub></i> )                |     | 157.68               | 24.14                                    | 19.3                             |
| DMSO                           | CH <sub>3</sub> S(O)CH <sub>3</sub> ( <i>C<sub>s</sub></i> )              |     | 137.46               | 44.36                                    | 41.0                             |
| methane sulfonic acid          | CH <sub>3</sub> SO <sub>3</sub> H ( <i>C<sub>1</sub></i> )                |     | 140.54               | 41.28                                    | 39.6                             |
| chloromethane                  | CH <sub>3</sub> Cl ( <i>C<sub>3v</sub></i> )                              |     | 150.09               | 31.73                                    | 25.6                             |
| dimethyl ether                 | CH <sub>3</sub> OCH <sub>3</sub> ( <i>C<sub>2v</sub></i> )                |     | 115.95               | 65.88                                    | 60.9                             |
| methyl ethyl ether             | MeOEt ( <i>C<sub>s</sub></i> )                                            |     | 117.41               | 64.42                                    | 57.6                             |
| methyl iso-propyl ether        | MeOPr- <i>i</i> ( <i>C<sub>1</sub></i> )                                  |     | 131.84               | 49.99                                    | 54.9                             |
| methyl tert-butyl ether        | MeOBu- <i>t</i> ( <i>C<sub>s</sub></i> )                                  |     | 128.48               | 53.34                                    | 49.4                             |
| ethylene                       | CH <sub>2</sub> =CH <sub>2</sub> ( <i>D<sub>2h</sub></i> )                |     | 51.43                | 130.39                                   | 123.3                            |
| <i>trans</i> -butadiene        | <i>t</i> -CH <sub>2</sub> =CHCH=CH <sub>2</sub> ( <i>C<sub>2h</sub></i> ) | C1  | 57.93                | 123.89                                   | 117.5                            |
|                                |                                                                           | C2  | 34.20                | 147.62                                   | 137.8                            |
| <i>cis</i> -butadiene          | <i>c</i> -CH <sub>2</sub> =CHCH=CH <sub>2</sub> ( <i>C<sub>2</sub></i> )  | C1  | 61.90                | 119.92                                   | 117.5                            |
|                                |                                                                           | C2  | 36.78                | 145.04                                   | 137.8                            |
| propylene                      | CH <sub>2</sub> =CHCH <sub>3</sub> ( <i>C<sub>s</sub></i> )               | C1  | 37.45                | 144.38                                   | 140.2                            |
|                                |                                                                           | C2  | 60.96                | 120.86                                   | 115.7                            |
|                                |                                                                           |     | 158.11               | 23.72                                    | 24.2                             |
| vinyl alcohol                  | CH <sub>2</sub> =CHOH ( <i>C<sub>s</sub></i> )                            | C1  | 27.11                | 154.71                                   | 149.0                            |
|                                |                                                                           | C2  | 90.87                | 90.95                                    | 88.0                             |
| methyl vinyl ether             | CH <sub>2</sub> =CHOMe ( <i>C<sub>s</sub></i> )                           | C1  | 20.37                | 161.45                                   | 152.9                            |
|                                |                                                                           | C2  | 97.94                | 83.88                                    | 85.5                             |
| acrolein                       | CH <sub>2</sub> =CHCHO ( <i>C<sub>s</sub></i> )                           | C4  | 33.28                | 148.54                                   | 138.5                            |
|                                |                                                                           | C1  | 35.72                | 146.10                                   | 138.0                            |
| methyl vinyl ketone            | CH <sub>2</sub> =CHCOCH <sub>3</sub> ( <i>C<sub>s</sub></i> )             | C4  | 33.88                | 147.94                                   | 137.5                            |
|                                |                                                                           | C1  | 47.31                | 134.51                                   | 129.0                            |
| <i>cis</i> -acrylic acid       | <i>c</i> -CH <sub>2</sub> =CHCOOH ( <i>C<sub>s</sub></i> )                | C4  | 47.08                | 134.75                                   | 128.1                            |
|                                |                                                                           | C1  | 40.20                | 141.62                                   | 133.2                            |
| <i>trans</i> -acrylic acid     | <i>t</i> -CH <sub>2</sub> =CHCOOH ( <i>C<sub>s</sub></i> )                | C2  | 44.42                | 137.41                                   | 128.1                            |
|                                |                                                                           | C1  | 43.15                | 138.68                                   | 133.2                            |
| nitroethylene                  | CH <sub>2</sub> =CHNO <sub>2</sub> ( <i>C<sub>s</sub></i> )               | C4  | 25.98                | 155.84                                   | 144.7                            |
|                                |                                                                           | C1  | 53.63                | 128.19                                   | 121.5                            |
| isocyanoethylene               | CH <sub>2</sub> =CHNC ( <i>C<sub>s</sub></i> )                            | C1  | 55.06                | 126.76                                   | 121.0                            |
|                                |                                                                           | C4  | 56.19                | 125.63                                   | 119.3                            |
| <i>N,N</i> -dimethylethenamine | ( <i>C<sub>1</sub></i> )                                                  | C13 | 165.89               | 15.93                                    | 12.8                             |
|                                |                                                                           | C10 | 121.55               | 60.27                                    | 53.6                             |
|                                |                                                                           | C1  | 129.74               | 52.08                                    | 44.6                             |

**Table S4.** The  $\sigma^t(\text{C: S})$ , and  $-\Delta\sigma^t(\text{C: S})$  and  $\delta(\text{C})_{\text{obsd}}$  for various 40 species (54 plots), calculated with the GIAO-DFT method under PBE0/BSS-A.

| Species                        | (symmetry)                                                                |     | $\sigma^t(\text{C})$ | $-\Delta\sigma^t(\text{C})_{\text{TMS}}$ | $\delta(\text{C})_{\text{obsd}}$ |
|--------------------------------|---------------------------------------------------------------------------|-----|----------------------|------------------------------------------|----------------------------------|
| TMS                            | SiMe <sub>4</sub> ( <i>T<sub>d</sub></i> )                                |     | 187.78               | 0.00                                     | 0.0                              |
| methane                        | CH <sub>4</sub> ( <i>T<sub>d</sub></i> )                                  |     | 193.26               | -5.48                                    | -4.6                             |
| ethane                         | (CH <sub>3</sub> CH <sub>3</sub> : <i>D<sub>3d</sub></i> )                |     | 178.68               | 9.10                                     | 7.3                              |
| propane                        | CH <sub>3</sub> CH <sub>2</sub> CH <sub>3</sub> ( <i>C<sub>2v</sub></i> ) |     | 166.69               | 21.10                                    | 16.4                             |
| <i>n</i> -pentane              | <i>n</i> -C <sub>5</sub> H <sub>12</sub> ( <i>C<sub>2v</sub></i> )        |     | 147.39               | 40.39                                    | 34.8                             |
| <i>n</i> -heptane              | <i>n</i> -C <sub>7</sub> H <sub>16</sub> ( <i>C<sub>2v</sub></i> )        |     | 150.50               | 37.29                                    | 29.5                             |
| <i>n</i> -nonane               | ( <i>C<sub>2v</sub></i> )                                                 |     | 150.62               | 37.16                                    | 29.8                             |
| methylamine                    | (CH <sub>3</sub> NH <sub>2</sub> : <i>C<sub>s</sub></i> )                 |     | 155.86               | 31.92                                    | 28.4                             |
| methanol                       | (CH <sub>3</sub> OH: <i>C<sub>s</sub></i> )                               |     | 133.95               | 53.83                                    | 50.2                             |
| fluoromethane                  | (CH <sub>3</sub> F: <i>C<sub>3v</sub></i> )                               |     | 114.00               | 73.78                                    | 71.6                             |
| dimethylamine                  | Me <sub>2</sub> NH ( <i>C<sub>s</sub></i> )                               |     | 146.71               | 41.07                                    | 38.2                             |
| trimethylamine                 | Me <sub>3</sub> N ( <i>C<sub>3v</sub></i> )                               |     | 138.75               | 49.03                                    | 47.6                             |
| acetonitrile                   | MeCN ( <i>C<sub>3v</sub></i> )                                            |     | 186.23               | 1.55                                     | 1.7                              |
| methyl isocyanide              | MeNC ( <i>C<sub>3v</sub></i> )                                            |     | 161.84               | 25.94                                    | 26.8                             |
| nitromethane                   | MeNO <sub>2</sub> ( <i>C<sub>s</sub></i> )                                |     | 124.54               | 63.24                                    | 62.5                             |
| acetaldehyde                   | CH <sub>3</sub> CHO ( <i>C<sub>s</sub></i> )                              |     | 153.37               | 34.41                                    | 31.3                             |
| acetone                        | CH <sub>3</sub> COCH <sub>3</sub> ( <i>C<sub>2v</sub></i> )               |     | 156.00               | 31.78                                    | 30.9                             |
| acetic acid                    | CH <sub>3</sub> COOH ( <i>C<sub>s</sub></i> )                             |     | 167.36               | 20.43                                    | 20.8                             |
| methyl acetate                 | CH <sub>3</sub> COOCH <sub>3</sub> ( <i>C<sub>s</sub></i> )               |     | 166.08               | 21.70                                    | 20.6                             |
| methanethiol                   | CH <sub>3</sub> SH ( <i>C<sub>s</sub></i> )                               |     | 176.75               | 11.03                                    | 6.5                              |
| dimethyl sulfide               | CH <sub>3</sub> SCH <sub>3</sub> ( <i>C<sub>2v</sub></i> )                |     | 165.67               | 22.12                                    | 19.3                             |
| DMSO                           | CH <sub>3</sub> S(O)CH <sub>3</sub> ( <i>C<sub>s</sub></i> )              |     | 148.14               | 39.64                                    | 41.0                             |
| methane sulfonic acid          | CH <sub>3</sub> SO <sub>3</sub> H ( <i>C<sub>1</sub></i> )                |     | 149.93               | 37.85                                    | 39.6                             |
| chloromethane                  | CH <sub>3</sub> Cl ( <i>C<sub>3v</sub></i> )                              |     | 158.04               | 29.74                                    | 25.6                             |
| dimethyl ether                 | CH <sub>3</sub> OCH <sub>3</sub> ( <i>C<sub>2v</sub></i> )                |     | 125.22               | 62.57                                    | 60.9                             |
| methyl ethyl ether             | MeOEt ( <i>C<sub>s</sub></i> )                                            |     | 126.49               | 61.29                                    | 57.6                             |
| methyl iso-propyl ether        | MeOPr- <i>i</i> ( <i>C<sub>1</sub></i> )                                  |     | 139.95               | 47.83                                    | 54.9                             |
| methyl tert-butyl ether        | MeOBu- <i>t</i> ( <i>C<sub>s</sub></i> )                                  |     | 137.04               | 50.74                                    | 49.4                             |
| ethylene                       | CH <sub>2</sub> =CH <sub>2</sub> ( <i>D<sub>2h</sub></i> )                |     | 56.14                | 131.64                                   | 123.3                            |
| <i>trans</i> -butadiene        | <i>t</i> -CH <sub>2</sub> =CHCH=CH <sub>2</sub> ( <i>C<sub>2h</sub></i> ) | C1  | 62.52                | 125.26                                   | 117.5                            |
|                                |                                                                           | C2  | 39.78                | 148.01                                   | 137.8                            |
| <i>cis</i> -butadiene          | <i>c</i> -CH <sub>2</sub> =CHCH=CH <sub>2</sub> ( <i>C<sub>2</sub></i> )  | C1  | 65.66                | 122.12                                   | 117.5                            |
|                                |                                                                           | C2  | 41.93                | 145.85                                   | 137.8                            |
| propylene                      | CH <sub>2</sub> =CHCH <sub>3</sub> ( <i>C<sub>s</sub></i> )               | C1  | 42.82                | 144.96                                   | 140.2                            |
|                                |                                                                           | C2  | 65.35                | 122.43                                   | 115.7                            |
|                                |                                                                           |     | 164.87               | 22.91                                    | 24.2                             |
| vinyl alcohol                  | CH <sub>2</sub> =CHOH ( <i>C<sub>s</sub></i> )                            | C1  | 32.92                | 154.86                                   | 149.0                            |
|                                |                                                                           | C2  | 94.61                | 93.17                                    | 88.0                             |
| methyl vinyl ether             | CH <sub>2</sub> =CHOMe ( <i>C<sub>s</sub></i> )                           | C1  | 25.93                | 161.86                                   | 152.9                            |
|                                |                                                                           | C2  | 101.73               | 86.05                                    | 85.5                             |
| acrolein                       | CH <sub>2</sub> =CHCHO ( <i>C<sub>s</sub></i> )                           | C4  | 38.89                | 148.89                                   | 138.5                            |
|                                |                                                                           | C1  | 41.29                | 146.50                                   | 138.0                            |
| methyl vinyl ketone            | CH <sub>2</sub> =CHCOCH <sub>3</sub> ( <i>C<sub>s</sub></i> )             | C4  | 39.09                | 148.70                                   | 137.5                            |
|                                |                                                                           | C1  | 51.57                | 136.21                                   | 129.0                            |
| <i>cis</i> -acrylic acid       | <i>c</i> -CH <sub>2</sub> =CHCOOH ( <i>C<sub>s</sub></i> )                | C4  | 52.93                | 134.85                                   | 128.1                            |
|                                |                                                                           | C1  | 43.74                | 144.04                                   | 133.2                            |
| <i>trans</i> -acrylic acid     | <i>t</i> -CH <sub>2</sub> =CHCOOH ( <i>C<sub>s</sub></i> )                | C2  | 50.15                | 137.63                                   | 128.1                            |
|                                |                                                                           | C1  | 46.93                | 140.85                                   | 133.2                            |
| nitroethylene                  | CH <sub>2</sub> =CHNO <sub>2</sub> ( <i>C<sub>s</sub></i> )               | C4  | 33.29                | 154.49                                   | 144.7                            |
|                                |                                                                           | C1  | 56.65                | 131.13                                   | 121.5                            |
| isocyanoethylene               | CH <sub>2</sub> =CHNC ( <i>C<sub>s</sub></i> )                            | C1  | 59.99                | 127.79                                   | 121.0                            |
|                                |                                                                           | C4  | 60.24                | 127.54                                   | 119.3                            |
| <i>N,N</i> -dimethylethenamine | ( <i>C<sub>1</sub></i> )                                                  | C13 | 172.06               | 15.72                                    | 12.8                             |
|                                |                                                                           | C10 | 130.96               | 56.82                                    | 53.6                             |
|                                |                                                                           | C1  | 137.67               | 50.11                                    | 44.6                             |

**Table S5.** The  $\sigma^t(\text{C: S})$ , and  $-\Delta\sigma^t(\text{C: S})$  and  $\delta(\text{C})_{\text{obsd}}$  for various 40 species (54 plots), calculated with the GIAO-DFT method under LC- $\omega$ PBE/BSS-A.

| Species                        | (symmetry)                                                                |     | $\sigma^t(\text{C})$ | $-\Delta\sigma^t(\text{C})_{\text{TMS}}$ | $\delta(\text{C})_{\text{obsd}}$ |
|--------------------------------|---------------------------------------------------------------------------|-----|----------------------|------------------------------------------|----------------------------------|
| TMS                            | SiMe <sub>4</sub> ( <i>T<sub>d</sub></i> )                                |     | 192.27               | 0.00                                     | 0.0                              |
| methane                        | CH <sub>4</sub> ( <i>T<sub>d</sub></i> )                                  |     | 196.42               | -4.15                                    | -4.6                             |
| ethane                         | (CH <sub>3</sub> CH <sub>3</sub> : <i>D<sub>3d</sub></i> )                |     | 184.00               | 8.27                                     | 7.3                              |
| propane                        | CH <sub>3</sub> CH <sub>2</sub> CH <sub>3</sub> ( <i>C<sub>2v</sub></i> ) |     | 173.58               | 18.69                                    | 16.4                             |
| <i>n</i> -pentane              | <i>n</i> -C <sub>5</sub> H <sub>12</sub> ( <i>C<sub>2v</sub></i> )        |     | 154.78               | 37.49                                    | 34.8                             |
| <i>n</i> -heptane              | <i>n</i> -C <sub>7</sub> H <sub>16</sub> ( <i>C<sub>2v</sub></i> )        |     | 157.44               | 34.83                                    | 29.5                             |
| <i>n</i> -nonane               | ( <i>C<sub>2v</sub></i> )                                                 |     | 157.55               | 34.72                                    | 29.8                             |
| methylamine                    | (CH <sub>3</sub> NH <sub>2</sub> : <i>C<sub>s</sub></i> )                 |     | 161.80               | 30.47                                    | 28.4                             |
| methanol                       | (CH <sub>3</sub> OH: <i>C<sub>s</sub></i> )                               |     | 138.67               | 53.60                                    | 50.2                             |
| fluoromethane                  | (CH <sub>3</sub> F: <i>C<sub>3v</sub></i> )                               |     | 116.47               | 75.80                                    | 71.6                             |
| dimethylamine                  | Me <sub>2</sub> NH ( <i>C<sub>s</sub></i> )                               |     | 152.83               | 39.44                                    | 38.2                             |
| trimethylamine                 | Me <sub>3</sub> N ( <i>C<sub>3v</sub></i> )                               |     | 144.55               | 47.72                                    | 47.6                             |
| acetonitrile                   | MeCN ( <i>C<sub>3v</sub></i> )                                            |     | 190.21               | 2.06                                     | 1.7                              |
| methyl isocyanide              | MeNC ( <i>C<sub>3v</sub></i> )                                            |     | 165.45               | 26.82                                    | 26.8                             |
| nitromethane                   | MeNO <sub>2</sub> ( <i>C<sub>s</sub></i> )                                |     | 127.05               | 65.22                                    | 62.5                             |
| acetaldehyde                   | CH <sub>3</sub> CHO ( <i>C<sub>s</sub></i> )                              |     | 157.38               | 34.89                                    | 31.3                             |
| acetone                        | CH <sub>3</sub> COCH <sub>3</sub> ( <i>C<sub>2v</sub></i> )               |     | 159.23               | 33.04                                    | 30.9                             |
| acetic acid                    | CH <sub>3</sub> COOH ( <i>C<sub>s</sub></i> )                             |     | 170.26               | 22.01                                    | 20.8                             |
| methyl acetate                 | CH <sub>3</sub> COOCH <sub>3</sub> ( <i>C<sub>s</sub></i> )               |     | 169.04               | 23.23                                    | 20.6                             |
| methanethiol                   | CH <sub>3</sub> SH ( <i>C<sub>s</sub></i> )                               |     | 183.81               | 8.46                                     | 6.5                              |
| dimethyl sulfide               | CH <sub>3</sub> SCH <sub>3</sub> ( <i>C<sub>2v</sub></i> )                |     | 173.07               | 19.20                                    | 19.3                             |
| DMSO                           | CH <sub>3</sub> S(O)CH <sub>3</sub> ( <i>C<sub>s</sub></i> )              |     | 156.61               | 35.66                                    | 41.0                             |
| methane sulfonic acid          | CH <sub>3</sub> SO <sub>3</sub> H ( <i>C<sub>1</sub></i> )                |     | 153.66               | 38.61                                    | 39.6                             |
| chloromethane                  | CH <sub>3</sub> Cl ( <i>C<sub>3v</sub></i> )                              |     | 165.44               | 26.83                                    | 25.6                             |
| dimethyl ether                 | CH <sub>3</sub> OCH <sub>3</sub> ( <i>C<sub>2v</sub></i> )                |     | 130.13               | 62.14                                    | 60.9                             |
| methyl ethyl ether             | MeOEt ( <i>C<sub>s</sub></i> )                                            |     | 131.30               | 60.97                                    | 57.6                             |
| methyl iso-propyl ether        | MeOPr- <i>i</i> ( <i>C<sub>1</sub></i> )                                  |     | 143.79               | 48.48                                    | 54.9                             |
| methyl tert-butyl ether        | MeOBu- <i>t</i> ( <i>C<sub>s</sub></i> )                                  |     | 141.41               | 50.86                                    | 49.4                             |
| ethylene                       | CH <sub>2</sub> =CH <sub>2</sub> ( <i>D<sub>2h</sub></i> )                |     | 56.03                | 136.24                                   | 123.3                            |
| <i>trans</i> -butadiene        | <i>t</i> -CH <sub>2</sub> =CHCH=CH <sub>2</sub> ( <i>C<sub>2h</sub></i> ) | C1  | 62.54                | 129.73                                   | 117.5                            |
|                                |                                                                           | C2  | 40.82                | 151.45                                   | 137.8                            |
| <i>cis</i> -butadiene          | <i>c</i> -CH <sub>2</sub> =CHCH=CH <sub>2</sub> ( <i>C<sub>2</sub></i> )  | C1  | 64.73                | 127.54                                   | 117.5                            |
|                                |                                                                           | C2  | 42.02                | 150.25                                   | 137.8                            |
| propylene                      | CH <sub>2</sub> =CHCH <sub>3</sub> ( <i>C<sub>s</sub></i> )               | C1  | 43.65                | 148.62                                   | 140.2                            |
|                                |                                                                           | C2  | 65.14                | 127.13                                   | 115.7                            |
|                                |                                                                           |     | 170.45               | 21.82                                    | 24.2                             |
| vinyl alcohol                  | CH <sub>2</sub> =CHOH ( <i>C<sub>s</sub></i> )                            | C1  | 33.03                | 159.24                                   | 149.0                            |
|                                |                                                                           | C2  | 94.03                | 98.24                                    | 88.0                             |
| methyl vinyl ether             | CH <sub>2</sub> =CHOMe ( <i>C<sub>s</sub></i> )                           | C1  | 25.45                | 166.82                                   | 152.9                            |
|                                |                                                                           | C2  | 101.65               | 90.62                                    | 85.5                             |
| acrolein                       | CH <sub>2</sub> =CHCHO ( <i>C<sub>s</sub></i> )                           | C4  | 39.45                | 152.82                                   | 138.5                            |
|                                |                                                                           | C1  | 43.01                | 149.26                                   | 138.0                            |
| methyl vinyl ketone            | CH <sub>2</sub> =CHCOCH <sub>3</sub> ( <i>C<sub>s</sub></i> )             | C4  | 39.28                | 152.99                                   | 137.5                            |
|                                |                                                                           | C1  | 52.20                | 140.07                                   | 129.0                            |
| <i>cis</i> -acrylic acid       | <i>c</i> -CH <sub>2</sub> =CHCOOH ( <i>C<sub>s</sub></i> )                | C4  | 53.42                | 138.85                                   | 128.1                            |
|                                |                                                                           | C1  | 43.80                | 148.47                                   | 133.2                            |
| <i>trans</i> -acrylic acid     | <i>t</i> -CH <sub>2</sub> =CHCOOH ( <i>C<sub>s</sub></i> )                | C2  | 50.78                | 141.49                                   | 128.1                            |
|                                |                                                                           | C1  | 46.95                | 145.32                                   | 133.2                            |
| nitroethylene                  | CH <sub>2</sub> =CHNO <sub>2</sub> ( <i>C<sub>s</sub></i> )               | C4  | 34.08                | 158.19                                   | 144.7                            |
|                                |                                                                           | C1  | 56.75                | 135.52                                   | 121.5                            |
| isocyanoethylene               | CH <sub>2</sub> =CHNC ( <i>C<sub>s</sub></i> )                            | C1  | 60.27                | 132.00                                   | 121.0                            |
|                                |                                                                           | C4  | 58.97                | 133.30                                   | 119.3                            |
| <i>N,N</i> -dimethylethenamine | ( <i>C<sub>1</sub></i> )                                                  | C13 | 176.94               | 15.33                                    | 12.8                             |
|                                |                                                                           | C10 | 137.82               | 54.45                                    | 53.6                             |
|                                |                                                                           | C1  | 143.56               | 48.71                                    | 44.6                             |

**Table S6.** The  $\sigma^t(\text{C: S})$ , and  $-\Delta\sigma^t(\text{C: S})$  and  $\delta(\text{C})_{\text{obsd}}$  for various 40 species (54 plots), calculated with the GIAO-DFT method under  $\omega\text{B97X-D/BSS-A}$ .

| Species                        | (symmetry)                                                                |     | $\sigma^t(\text{C})$ | $-\Delta\sigma^t(\text{C})_{\text{TMS}}$ | $\delta(\text{C})_{\text{obsd}}$ |
|--------------------------------|---------------------------------------------------------------------------|-----|----------------------|------------------------------------------|----------------------------------|
| TMS                            | SiMe <sub>4</sub> ( <i>T<sub>d</sub></i> )                                |     | 188.17               | 0.00                                     | 0.0                              |
| methane                        | CH <sub>4</sub> ( <i>T<sub>d</sub></i> )                                  |     | 192.93               | -4.76                                    | -4.6                             |
| ethane                         | (CH <sub>3</sub> CH <sub>3</sub> : <i>D<sub>3d</sub></i> )                |     | 178.91               | 9.26                                     | 7.3                              |
| propane                        | CH <sub>3</sub> CH <sub>2</sub> CH <sub>3</sub> ( <i>C<sub>2v</sub></i> ) |     | 167.63               | 20.54                                    | 16.4                             |
| <i>n</i> -pentane              | <i>n</i> -C <sub>5</sub> H <sub>12</sub> ( <i>C<sub>2v</sub></i> )        |     | 148.34               | 39.83                                    | 34.8                             |
| <i>n</i> -heptane              | <i>n</i> -C <sub>7</sub> H <sub>16</sub> ( <i>C<sub>2v</sub></i> )        |     | 151.40               | 36.77                                    | 29.5                             |
| <i>n</i> -nonane               | ( <i>C<sub>2v</sub></i> )                                                 |     | 151.39               | 36.78                                    | 29.8                             |
| methylamine                    | (CH <sub>3</sub> NH <sub>2</sub> : <i>C<sub>s</sub></i> )                 |     | 156.46               | 31.71                                    | 28.4                             |
| methanol                       | (CH <sub>3</sub> OH: <i>C<sub>s</sub></i> )                               |     | 134.57               | 53.60                                    | 50.2                             |
| fluoromethane                  | (CH <sub>3</sub> F: <i>C<sub>3v</sub></i> )                               |     | 114.22               | 73.95                                    | 71.6                             |
| dimethylamine                  | Me <sub>2</sub> NH ( <i>C<sub>s</sub></i> )                               |     | 147.30               | 40.87                                    | 38.2                             |
| trimethylamine                 | Me <sub>3</sub> N ( <i>C<sub>3v</sub></i> )                               |     | 139.09               | 49.08                                    | 47.6                             |
| acetonitrile                   | MeCN ( <i>C<sub>3v</sub></i> )                                            |     | 186.29               | 1.88                                     | 1.7                              |
| methyl isocyanide              | MeNC ( <i>C<sub>3v</sub></i> )                                            |     | 161.30               | 26.87                                    | 26.8                             |
| nitromethane                   | MeNO <sub>2</sub> ( <i>C<sub>s</sub></i> )                                |     | 123.55               | 64.63                                    | 62.5                             |
| acetaldehyde                   | CH <sub>3</sub> CHO ( <i>C<sub>s</sub></i> )                              |     | 153.58               | 34.59                                    | 31.3                             |
| acetone                        | CH <sub>3</sub> COCH <sub>3</sub> ( <i>C<sub>2v</sub></i> )               |     | 155.48               | 32.69                                    | 30.9                             |
| acetic acid                    | CH <sub>3</sub> COOH ( <i>C<sub>s</sub></i> )                             |     | 166.70               | 21.47                                    | 20.8                             |
| methyl acetate                 | CH <sub>3</sub> COOCH <sub>3</sub> ( <i>C<sub>s</sub></i> )               |     | 165.37               | 22.80                                    | 20.6                             |
| methanethiol                   | CH <sub>3</sub> SH ( <i>C<sub>s</sub></i> )                               |     | 177.23               | 10.94                                    | 6.5                              |
| dimethyl sulfide               | CH <sub>3</sub> SCH <sub>3</sub> ( <i>C<sub>2v</sub></i> )                |     | 166.46               | 21.71                                    | 19.3                             |
| DMSO                           | CH <sub>3</sub> S(O)CH <sub>3</sub> ( <i>C<sub>s</sub></i> )              |     | 148.52               | 39.66                                    | 41.0                             |
| methane sulfonic acid          | CH <sub>3</sub> SO <sub>3</sub> H ( <i>C<sub>1</sub></i> )                |     | 149.11               | 39.07                                    | 39.6                             |
| chloromethane                  | CH <sub>3</sub> Cl ( <i>C<sub>3v</sub></i> )                              |     | 157.78               | 30.39                                    | 25.6                             |
| dimethyl ether                 | CH <sub>3</sub> OCH <sub>3</sub> ( <i>C<sub>2v</sub></i> )                |     | 125.94               | 62.23                                    | 60.9                             |
| methyl ethyl ether             | MeOEt ( <i>C<sub>s</sub></i> )                                            |     | 127.11               | 61.07                                    | 57.6                             |
| methyl iso-propyl ether        | MeOPr- <i>i</i> ( <i>C<sub>1</sub></i> )                                  |     | 139.86               | 48.32                                    | 54.9                             |
| methyl tert-butyl ether        | MeOBu- <i>t</i> ( <i>C<sub>s</sub></i> )                                  |     | 137.26               | 50.91                                    | 49.4                             |
| ethylene                       | CH <sub>2</sub> =CH <sub>2</sub> ( <i>D<sub>2h</sub></i> )                |     | 56.10                | 132.07                                   | 123.3                            |
| <i>trans</i> -butadiene        | <i>t</i> -CH <sub>2</sub> =CHCH=CH <sub>2</sub> ( <i>C<sub>2h</sub></i> ) | C1  | 65.34                | 122.83                                   | 117.5                            |
|                                |                                                                           | C2  | 39.94                | 148.24                                   | 137.8                            |
| <i>cis</i> -butadiene          | <i>c</i> -CH <sub>2</sub> =CHCH=CH <sub>2</sub> ( <i>C<sub>2</sub></i> )  | C1  | 65.66                | 122.52                                   | 117.5                            |
|                                |                                                                           | C2  | 41.69                | 146.48                                   | 137.8                            |
| propylene                      | CH <sub>2</sub> =CHCH <sub>3</sub> ( <i>C<sub>s</sub></i> )               | C1  | 42.68                | 145.49                                   | 140.2                            |
|                                |                                                                           | C2  | 65.34                | 122.83                                   | 115.7                            |
|                                |                                                                           |     | 165.74               | 22.43                                    | 24.2                             |
| vinyl alcohol                  | CH <sub>2</sub> =CHOH ( <i>C<sub>s</sub></i> )                            | C1  | 32.61                | 155.56                                   | 149.0                            |
|                                |                                                                           | C2  | 94.07                | 94.10                                    | 88.0                             |
| methyl vinyl ether             | CH <sub>2</sub> =CHOMe ( <i>C<sub>s</sub></i> )                           | C1  | 25.18                | 162.99                                   | 152.9                            |
|                                |                                                                           | C2  | 101.47               | 86.70                                    | 85.5                             |
| acrolein                       | CH <sub>2</sub> =CHCHO ( <i>C<sub>s</sub></i> )                           | C4  | 38.43                | 149.75                                   | 138.5                            |
|                                |                                                                           | C1  | 43.00                | 145.17                                   | 138.0                            |
| methyl vinyl ketone            | CH <sub>2</sub> =CHCOCH <sub>3</sub> ( <i>C<sub>s</sub></i> )             | C4  | 38.48                | 149.70                                   | 137.5                            |
|                                |                                                                           | C1  | 52.18                | 135.99                                   | 129.0                            |
| <i>cis</i> -acrylic acid       | <i>c</i> -CH <sub>2</sub> =CHCOOH ( <i>C<sub>s</sub></i> )                | C4  | 52.52                | 135.65                                   | 128.1                            |
|                                |                                                                           | C1  | 44.41                | 143.76                                   | 133.2                            |
| <i>trans</i> -acrylic acid     | <i>t</i> -CH <sub>2</sub> =CHCOOH ( <i>C<sub>s</sub></i> )                | C2  | 49.81                | 138.37                                   | 128.1                            |
|                                |                                                                           | C1  | 47.64                | 140.53                                   | 133.2                            |
| nitroethylene                  | CH <sub>2</sub> =CHNO <sub>2</sub> ( <i>C<sub>s</sub></i> )               | C4  | 32.39                | 155.78                                   | 144.7                            |
|                                |                                                                           | C1  | 57.32                | 130.85                                   | 121.5                            |
| isocyanoethylene               | CH <sub>2</sub> =CHNC ( <i>C<sub>s</sub></i> )                            | C1  | 60.56                | 127.61                                   | 121.0                            |
|                                |                                                                           | C4  | 59.03                | 129.14                                   | 119.3                            |
| <i>N,N</i> -dimethylethenamine | ( <i>C<sub>1</sub></i> )                                                  | C13 | 171.98               | 16.20                                    | 12.8                             |
|                                |                                                                           | C10 | 131.19               | 56.98                                    | 53.6                             |
|                                |                                                                           | C1  | 138.12               | 50.06                                    | 44.6                             |

**Table S7.** The  $\sigma^t(\text{C: S})$ , and  $-\Delta\sigma^t(\text{C: S})$  and  $\delta(\text{C})_{\text{obsd}}$  for various 40 species (54 plots), calculated with the GIAO-DFT method under MP2/BSS-A.

| Species                        | (symmetry)                                                                |     | $\sigma^t(\text{C})$ | $-\Delta\sigma^t(\text{C})_{\text{TMS}}$ | $\delta(\text{C})_{\text{obsd}}$ |
|--------------------------------|---------------------------------------------------------------------------|-----|----------------------|------------------------------------------|----------------------------------|
| TMS                            | SiMe <sub>4</sub> ( <i>T<sub>d</sub></i> )                                |     | 197.32               | 0.00                                     | 0.0                              |
| methane                        | CH <sub>4</sub> ( <i>T<sub>d</sub></i> )                                  |     | 201.35               | -4.02                                    | -4.6                             |
| ethane                         | (CH <sub>3</sub> CH <sub>3</sub> : <i>D<sub>3d</sub></i> )                |     | 188.18               | 9.14                                     | 7.3                              |
| propane                        | CH <sub>3</sub> CH <sub>2</sub> CH <sub>3</sub> ( <i>C<sub>2v</sub></i> ) |     | 176.73               | 20.59                                    | 16.4                             |
| <i>n</i> -pentane              | <i>n</i> -C <sub>5</sub> H <sub>12</sub> ( <i>C<sub>2v</sub></i> )        |     | 156.45               | 40.87                                    | 34.8                             |
| <i>n</i> -heptane              | <i>n</i> -C <sub>7</sub> H <sub>16</sub> ( <i>C<sub>2v</sub></i> )        |     | 159.47               | 37.86                                    | 29.5                             |
| <i>n</i> -nonane               | ( <i>C<sub>2v</sub></i> )                                                 |     | 159.43               | 37.89                                    | 29.8                             |
| methylamine                    | (CH <sub>3</sub> NH <sub>2</sub> : <i>C<sub>s</sub></i> )                 |     | 164.24               | 33.08                                    | 28.4                             |
| methanol                       | (CH <sub>3</sub> OH: <i>C<sub>s</sub></i> )                               |     | 142.66               | 54.66                                    | 50.2                             |
| fluoromethane                  | (CH <sub>3</sub> F: <i>C<sub>3v</sub></i> )                               |     | 122.79               | 74.54                                    | 71.6                             |
| dimethylamine                  | Me <sub>2</sub> NH ( <i>C<sub>s</sub></i> )                               |     | 155.11               | 42.21                                    | 38.2                             |
| trimethylamine                 | Me <sub>3</sub> N ( <i>C<sub>3v</sub></i> )                               |     | 145.86               | 51.46                                    | 47.6                             |
| acetonitrile                   | MeCN ( <i>C<sub>3v</sub></i> )                                            |     | 193.63               | 3.69                                     | 1.7                              |
| methyl isocyanide              | MeNC ( <i>C<sub>3v</sub></i> )                                            |     | 168.67               | 28.66                                    | 26.8                             |
| nitromethane                   | MeNO <sub>2</sub> ( <i>C<sub>s</sub></i> )                                |     | 135.04               | 62.29                                    | 62.5                             |
| acetaldehyde                   | CH <sub>3</sub> CHO ( <i>C<sub>s</sub></i> )                              |     | 163.05               | 34.27                                    | 31.3                             |
| acetone                        | CH <sub>3</sub> COCH <sub>3</sub> ( <i>C<sub>2v</sub></i> )               |     | 165.09               | 32.23                                    | 30.9                             |
| acetic acid                    | CH <sub>3</sub> COOH ( <i>C<sub>s</sub></i> )                             |     | 176.02               | 21.30                                    | 20.8                             |
| methyl acetate                 | CH <sub>3</sub> COOCH <sub>3</sub> ( <i>C<sub>s</sub></i> )               |     | 174.73               | 22.60                                    | 20.6                             |
| methanethiol                   | CH <sub>3</sub> SH ( <i>C<sub>s</sub></i> )                               |     | 187.17               | 10.15                                    | 6.5                              |
| dimethyl sulfide               | CH <sub>3</sub> SCH <sub>3</sub> ( <i>C<sub>2v</sub></i> )                |     | 175.30               | 22.02                                    | 19.3                             |
| DMSO                           | CH <sub>3</sub> S(O)CH <sub>3</sub> ( <i>C<sub>s</sub></i> )              |     | 157.69               | 39.63                                    | 41.0                             |
| methane sulfonic acid          | CH <sub>3</sub> SO <sub>3</sub> H ( <i>C<sub>1</sub></i> )                |     | 159.57               | 37.75                                    | 39.6                             |
| chloromethane                  | CH <sub>3</sub> Cl ( <i>C<sub>3v</sub></i> )                              |     | 168.74               | 28.59                                    | 25.6                             |
| dimethyl ether                 | CH <sub>3</sub> OCH <sub>3</sub> ( <i>C<sub>2v</sub></i> )                |     | 137.16               | 60.16                                    | 60.9                             |
| methyl ethyl ether             | MeOEt ( <i>C<sub>s</sub></i> )                                            |     | 138.17               | 59.16                                    | 57.6                             |
| methyl iso-propyl ether        | MeOPr- <i>i</i> ( <i>C<sub>1</sub></i> )                                  |     | 147.67               | 49.65                                    | 54.9                             |
| methyl tert-butyl ether        | MeOBu- <i>t</i> ( <i>C<sub>s</sub></i> )                                  |     | 147.28               | 50.04                                    | 49.4                             |
| ethylene                       | CH <sub>2</sub> =CH <sub>2</sub> ( <i>D<sub>2h</sub></i> )                |     | 62.47                | 134.86                                   | 123.3                            |
| <i>trans</i> -butadiene        | <i>t</i> -CH <sub>2</sub> =CHCH=CH <sub>2</sub> ( <i>C<sub>2h</sub></i> ) | C1  | 69.27                | 128.05                                   | 117.5                            |
|                                |                                                                           | C2  | 46.82                | 150.50                                   | 137.8                            |
| <i>cis</i> -butadiene          | <i>c</i> -CH <sub>2</sub> =CHCH=CH <sub>2</sub> ( <i>C<sub>2</sub></i> )  | C1  | 70.17                | 127.16                                   | 117.5                            |
|                                |                                                                           | C2  | 48.53                | 148.79                                   | 137.8                            |
| propylene                      | CH <sub>2</sub> =CHCH <sub>3</sub> ( <i>C<sub>s</sub></i> )               | C1  | 59.33                | 137.99                                   | 140.2                            |
|                                |                                                                           | C2  | 79.57                | 117.75                                   | 115.7                            |
|                                |                                                                           |     | 174.74               | 22.59                                    | 24.2                             |
| vinyl alcohol                  | CH <sub>2</sub> =CHOH ( <i>C<sub>s</sub></i> )                            | C1  | 45.61                | 151.71                                   | 149.0                            |
|                                |                                                                           | C2  | 107.50               | 89.82                                    | 88.0                             |
| methyl vinyl ether             | CH <sub>2</sub> =CHOMe ( <i>C<sub>s</sub></i> )                           | C1  | 37.79                | 159.53                                   | 152.9                            |
|                                |                                                                           | C2  | 114.20               | 83.12                                    | 85.5                             |
| acrolein                       | CH <sub>2</sub> =CHCHO ( <i>C<sub>s</sub></i> )                           | C4  | 51.86                | 145.47                                   | 138.5                            |
|                                |                                                                           | C1  | 61.36                | 135.96                                   | 138.0                            |
| methyl vinyl ketone            | CH <sub>2</sub> =CHCOCH <sub>3</sub> ( <i>C<sub>s</sub></i> )             | C4  | 52.41                | 144.91                                   | 137.5                            |
|                                |                                                                           | C1  | 68.90                | 128.42                                   | 129.0                            |
| <i>cis</i> -acrylic acid       | <i>c</i> -CH <sub>2</sub> =CHCOOH ( <i>C<sub>s</sub></i> )                | C4  | 66.26                | 131.07                                   | 128.1                            |
|                                |                                                                           | C1  | 63.68                | 133.64                                   | 133.2                            |
| <i>trans</i> -acrylic acid     | <i>t</i> -CH <sub>2</sub> =CHCOOH ( <i>C<sub>s</sub></i> )                | C2  | 63.90                | 133.42                                   | 128.1                            |
|                                |                                                                           | C1  | 65.20                | 132.12                                   | 133.2                            |
| nitroethylene                  | CH <sub>2</sub> =CHNO <sub>2</sub> ( <i>C<sub>s</sub></i> )               | C4  | 46.86                | 150.47                                   | 144.7                            |
|                                |                                                                           | C1  | 76.72                | 120.60                                   | 121.5                            |
| isocyanoethylene               | CH <sub>2</sub> =CHNC ( <i>C<sub>s</sub></i> )                            | C1  | 75.91                | 121.41                                   | 121.0                            |
|                                |                                                                           | C4  | 72.41                | 124.92                                   | 119.3                            |
| <i>N,N</i> -dimethylethenamine | ( <i>C<sub>1</sub></i> )                                                  | C13 | 181.08               | 16.25                                    | 12.8                             |
|                                |                                                                           | C10 | 137.82               | 59.51                                    | 53.6                             |
|                                |                                                                           | C1  | 144.94               | 52.39                                    | 44.6                             |



**Table S8.** The  $\sigma^t(\text{C: S})$ , and  $-\Delta\sigma^t(\text{C: S})$  and  $\delta(\text{C})_{\text{obsd}}$  for various 40 species (54 plots), calculated with the GIAO-DFT method of B3LYP/BSS-A under the solvent effect of  $\text{CHCl}_3$ .

| Species                        | (symmetry)                                                    |     | $\sigma^t(\text{C})$ | $-\Delta\sigma^t(\text{C})_{\text{TMS}}$ | $\delta(\text{C})_{\text{obsd}}$ |
|--------------------------------|---------------------------------------------------------------|-----|----------------------|------------------------------------------|----------------------------------|
| TMS                            | $\text{SiMe}_4$ ( $T_d$ )                                     |     | 183.45               | 0.00                                     | 0.0                              |
| methane                        | $\text{CH}_4$ ( $T_d$ )                                       |     | 189.75               | -6.29                                    | -4.6                             |
| ethane                         | $(\text{CH}_3\text{CH}_3)$ : $D_{3d}$                         |     | 173.69               | 9.76                                     | 7.3                              |
| propane                        | $\text{CH}_3\text{CH}_2\text{CH}_3$ ( $C_{2v}$ )              |     | 160.29               | 23.16                                    | 16.4                             |
| <i>n</i> -pentane              | <i>n</i> - $\text{C}_5\text{H}_{12}$ ( $C_{2v}$ )             |     | 141.16               | 42.30                                    | 34.8                             |
| <i>n</i> -heptane              | <i>n</i> - $\text{C}_7\text{H}_{16}$ ( $C_{2v}$ )             |     | 144.29               | 39.17                                    | 29.5                             |
| <i>n</i> -nonane               | ( $C_{2v}$ )                                                  |     | 144.39               | 39.06                                    | 29.8                             |
| methylamine                    | $(\text{CH}_3\text{NH}_2)$ : $C_s$                            |     | 150.18               | 33.27                                    | 28.4                             |
| methanol                       | $(\text{CH}_3\text{OH})$ : $C_s$                              |     | 127.30               | 56.15                                    | 50.2                             |
| fluoromethane                  | $(\text{CH}_3\text{F})$ : $C_{3v}$                            |     | 105.90               | 77.56                                    | 71.6                             |
| dimethylamine                  | $\text{Me}_2\text{NH}$ ( $C_s$ )                              |     | 141.30               | 42.16                                    | 38.2                             |
| trimethylamine                 | $\text{Me}_3\text{N}$ ( $C_{3v}$ )                            |     | 133.54               | 49.91                                    | 47.6                             |
| acetonitrile                   | $\text{MeCN}$ ( $C_{3v}$ )                                    |     | 181.97               | 1.49                                     | 1.7                              |
| methyl isocyanide              | $\text{MeNC}$ ( $C_{3v}$ )                                    |     | 155.96               | 27.50                                    | 26.8                             |
| nitromethane                   | $\text{MeNO}_2$ ( $C_s$ )                                     |     | 115.52               | 67.93                                    | 62.5                             |
| acetaldehyde                   | $\text{CH}_3\text{CHO}$ ( $C_s$ )                             |     | 147.47               | 35.98                                    | 31.3                             |
| acetone                        | $\text{CH}_3\text{COCH}_3$ ( $C_{2v}$ )                       |     | 150.11               | 33.34                                    | 30.9                             |
| acetic acid                    | $\text{CH}_3\text{COOH}$ ( $C_s$ )                            |     | 161.68               | 21.78                                    | 20.8                             |
| methyl acetate                 | $\text{CH}_3\text{COOCH}_3$ ( $C_s$ )                         |     | 160.34               | 23.12                                    | 20.6                             |
| methanethiol                   | $\text{CH}_3\text{SH}$ ( $C_s$ )                              |     | 170.38               | 13.08                                    | 6.5                              |
| dimethyl sulfide               | $\text{CH}_3\text{SCH}_3$ ( $C_{2v}$ )                        |     | 159.72               | 23.73                                    | 19.3                             |
| DMSO                           | $\text{CH}_3\text{S}(\text{O})\text{CH}_3$ ( $C_s$ )          |     | 138.63               | 44.82                                    | 41.0                             |
| methane sulfonic acid          | $\text{CH}_3\text{SO}_3\text{H}$ ( $C_1$ )                    |     | 141.59               | 41.86                                    | 39.6                             |
| chloromethane                  | $\text{CH}_3\text{Cl}$ ( $C_{3v}$ )                           |     | 149.76               | 33.69                                    | 25.6                             |
| dimethyl ether                 | $\text{CH}_3\text{OCH}_3$ ( $C_{2v}$ )                        |     | 119.14               | 64.31                                    | 60.9                             |
| methyl ethyl ether             | $\text{MeOEt}$ ( $C_s$ )                                      |     | 120.49               | 62.97                                    | 57.6                             |
| methyl iso-propyl ether        | $\text{MeOPr-}i$ ( $C_1$ )                                    |     | 133.47               | 49.98                                    | 54.9                             |
| methyl tert-butyl ether        | $\text{MeOBu-}t$ ( $C_s$ )                                    |     | 130.67               | 52.79                                    | 49.4                             |
| ethylene                       | $\text{CH}_2=\text{CH}_2$ ( $D_{2h}$ )                        |     | 51.68                | 131.77                                   | 123.3                            |
| <i>trans</i> -butadiene        | <i>t</i> - $\text{CH}_2=\text{CHCH}=\text{CH}_2$ ( $C_{2h}$ ) | C1  | 58.32                | 125.14                                   | 117.5                            |
|                                |                                                               | C2  | 34.14                | 149.31                                   | 137.8                            |
| <i>cis</i> -butadiene          | <i>c</i> - $\text{CH}_2=\text{CHCH}=\text{CH}_2$ ( $C_2$ )    | C1  | 62.01                | 121.45                                   | 117.5                            |
|                                |                                                               | C2  | 36.33                | 147.12                                   | 137.8                            |
| propylene                      | $\text{CH}_2=\text{CHCH}_3$ ( $C_s$ )                         | C1  | 35.74                | 147.72                                   | 140.2                            |
|                                |                                                               | C2  | 62.44                | 121.01                                   | 115.7                            |
|                                |                                                               |     | 160.08               | 23.37                                    | 24.2                             |
| vinyl alcohol                  | $\text{CH}_2=\text{CHOH}$ ( $C_s$ )                           | C1  | 24.72                | 158.74                                   | 149.0                            |
|                                |                                                               | C2  | 91.82                | 91.63                                    | 88.0                             |
| methyl vinyl ether             | $\text{CH}_2=\text{CHOMe}$ ( $C_s$ )                          | C1  | 19.10                | 164.35                                   | 152.9                            |
|                                |                                                               | C2  | 97.53                | 85.92                                    | 85.5                             |
| acrolein                       | $\text{CH}_2=\text{CHCHO}$ ( $C_s$ )                          | C4  | 34.05                | 149.41                                   | 138.5                            |
|                                |                                                               | C1  | 33.04                | 150.42                                   | 138.0                            |
| methyl vinyl ketone            | $\text{CH}_2=\text{CHCOCH}_3$ ( $C_s$ )                       | C4  | 34.44                | 149.02                                   | 137.5                            |
|                                |                                                               | C1  | 43.47                | 139.99                                   | 129.0                            |
| <i>cis</i> -acrylic acid       | <i>c</i> - $\text{CH}_2=\text{CHCOOH}$ ( $C_s$ )              | C4  | 48.02                | 135.43                                   | 128.1                            |
|                                |                                                               | C1  | 38.25                | 145.20                                   | 133.2                            |
| <i>trans</i> -acrylic acid     | <i>t</i> - $\text{CH}_2=\text{CHCOOH}$ ( $C_s$ )              | C2  | 45.88                | 137.57                                   | 128.1                            |
|                                |                                                               | C1  | 39.93                | 143.52                                   | 133.2                            |
| nitroethylene                  | $\text{CH}_2=\text{CHNO}_2$ ( $C_s$ )                         | C4  | 26.54                | 156.92                                   | 144.7                            |
|                                |                                                               | C1  | 48.91                | 134.55                                   | 121.5                            |
| isocyanoethylene               | $\text{CH}_2=\text{CHNC}$ ( $C_s$ )                           | C1  | 52.33                | 131.13                                   | 121.0                            |
|                                |                                                               | C4  | 55.91                | 127.55                                   | 119.3                            |
| <i>N,N</i> -dimethylethenamine | ( $C_1$ )                                                     | C13 | 166.68               | 16.77                                    | 12.8                             |
|                                |                                                               | C10 | 124.47               | 58.99                                    | 53.6                             |
|                                |                                                               | C1  | 132.41               | 51.05                                    | 44.6                             |

**Table S9.** The  $\sigma^t(\text{C: S})$ , and  $-\Delta\sigma^t(\text{C: S})$  and  $\delta(\text{C})_{\text{obsd}}$  for various 40 species (54 plots), calculated with the GIAO-DFT method under B3LYP/def2TZVP.

| Species                        | (symmetry)                                                                |     | $\sigma^t(\text{C})$ | $-\Delta\sigma^t(\text{C})_{\text{TMS}}$ | $\delta(\text{C})_{\text{obsd}}$ |
|--------------------------------|---------------------------------------------------------------------------|-----|----------------------|------------------------------------------|----------------------------------|
| TMS                            | SiMe <sub>4</sub> ( <i>T<sub>d</sub></i> )                                |     | 183.49               | 0.00                                     | 0.0                              |
| methane                        | CH <sub>4</sub> ( <i>T<sub>d</sub></i> )                                  |     | 190.37               | -6.88                                    | -4.6                             |
| ethane                         | (CH <sub>3</sub> CH <sub>3</sub> : <i>D<sub>3d</sub></i> )                |     | 173.87               | 9.61                                     | 7.3                              |
| propane                        | CH <sub>3</sub> CH <sub>2</sub> CH <sub>3</sub> ( <i>C<sub>2v</sub></i> ) |     | 160.72               | 22.77                                    | 16.4                             |
| <i>n</i> -pentane              | <i>n</i> -C <sub>5</sub> H <sub>12</sub> ( <i>C<sub>2v</sub></i> )        |     | 141.79               | 41.70                                    | 34.8                             |
| <i>n</i> -heptane              | <i>n</i> -C <sub>7</sub> H <sub>16</sub> ( <i>C<sub>2v</sub></i> )        |     | 145.06               | 38.43                                    | 29.5                             |
| <i>n</i> -nonane               | ( <i>C<sub>2v</sub></i> )                                                 |     | 145.13               | 38.36                                    | 29.8                             |
| methylamine                    | (CH <sub>3</sub> NH <sub>2</sub> : <i>C<sub>s</sub></i> )                 |     | 150.79               | 32.70                                    | 28.4                             |
| methanol                       | (CH <sub>3</sub> OH: <i>C<sub>s</sub></i> )                               |     | 128.75               | 54.74                                    | 50.2                             |
| fluoromethane                  | (CH <sub>3</sub> F: <i>C<sub>3v</sub></i> )                               |     | 108.75               | 74.74                                    | 71.6                             |
| dimethylamine                  | Me <sub>2</sub> NH ( <i>C<sub>s</sub></i> )                               |     | 142.13               | 41.36                                    | 38.2                             |
| trimethylamine                 | Me <sub>3</sub> N ( <i>C<sub>3v</sub></i> )                               |     | 134.60               | 48.89                                    | 47.6                             |
| acetonitrile                   | MeCN ( <i>C<sub>3v</sub></i> )                                            |     | 182.83               | 0.66                                     | 1.7                              |
| methyl isocyanide              | MeNC ( <i>C<sub>3v</sub></i> )                                            |     | 158.13               | 25.36                                    | 26.8                             |
| nitromethane                   | MeNO <sub>2</sub> ( <i>C<sub>s</sub></i> )                                |     | 119.19               | 64.29                                    | 62.5                             |
| acetaldehyde                   | CH <sub>3</sub> CHO ( <i>C<sub>s</sub></i> )                              |     | 149.61               | 33.87                                    | 31.3                             |
| acetone                        | CH <sub>3</sub> COCH <sub>3</sub> ( <i>C<sub>2v</sub></i> )               |     | 152.45               | 31.04                                    | 30.9                             |
| acetic acid                    | CH <sub>3</sub> COOH ( <i>C<sub>s</sub></i> )                             |     | 163.38               | 20.11                                    | 20.8                             |
| methyl acetate                 | CH <sub>3</sub> COOCH <sub>3</sub> ( <i>C<sub>s</sub></i> )               |     | 161.72               | 21.76                                    | 20.6                             |
| methanethiol                   | CH <sub>3</sub> SH ( <i>C<sub>s</sub></i> )                               |     | 170.71               | 12.78                                    | 6.5                              |
| dimethyl sulfide               | CH <sub>3</sub> SCH <sub>3</sub> ( <i>C<sub>2v</sub></i> )                |     | 160.07               | 23.42                                    | 19.3                             |
| DMSO                           | CH <sub>3</sub> S(O)CH <sub>3</sub> ( <i>C<sub>s</sub></i> )              |     | 140.89               | 42.59                                    | 41.0                             |
| methane sulfonic acid          | CH <sub>3</sub> SO <sub>3</sub> H ( <i>C<sub>1</sub></i> )                |     | 142.75               | 40.74                                    | 39.6                             |
| chloromethane                  | CH <sub>3</sub> Cl ( <i>C<sub>3v</sub></i> )                              |     | 151.19               | 32.30                                    | 25.6                             |
| dimethyl ether                 | CH <sub>3</sub> OCH <sub>3</sub> ( <i>C<sub>2v</sub></i> )                |     | 120.43               | 63.06                                    | 60.9                             |
| methyl ethyl ether             | MeOEt ( <i>C<sub>s</sub></i> )                                            |     | 121.74               | 61.75                                    | 57.6                             |
| methyl iso-propyl ether        | MeOPr- <i>i</i> ( <i>C<sub>1</sub></i> )                                  |     | 135.03               | 48.46                                    | 54.9                             |
| methyl tert-butyl ether        | MeOBu- <i>t</i> ( <i>C<sub>s</sub></i> )                                  |     | 132.32               | 51.16                                    | 49.4                             |
| ethylene                       | CH <sub>2</sub> =CH <sub>2</sub> ( <i>D<sub>2h</sub></i> )                |     | 54.31                | 129.17                                   | 123.3                            |
| <i>trans</i> -butadiene        | <i>t</i> -CH <sub>2</sub> =CHCH=CH <sub>2</sub> ( <i>C<sub>2h</sub></i> ) | C1  | 61.16                | 122.32                                   | 117.5                            |
|                                |                                                                           | C2  | 36.46                | 147.03                                   | 137.8                            |
| <i>cis</i> -butadiene          | <i>c</i> -CH <sub>2</sub> =CHCH=CH <sub>2</sub> ( <i>C<sub>2</sub></i> )  | C1  | 64.40                | 119.08                                   | 117.5                            |
|                                |                                                                           | C2  | 38.83                | 144.66                                   | 137.8                            |
| propylene                      | CH <sub>2</sub> =CHCH <sub>3</sub> ( <i>C<sub>s</sub></i> )               | C1  | 39.27                | 144.22                                   | 140.2                            |
|                                |                                                                           | C2  | 63.78                | 119.70                                   | 115.7                            |
|                                |                                                                           | C3  | 160.66               | 22.83                                    | 24.2                             |
| vinyl alcohol                  | CH <sub>2</sub> =CHOH ( <i>C<sub>s</sub></i> )                            | C1  | 28.52                | 154.97                                   | 149.0                            |
|                                |                                                                           | C2  | 92.54                | 90.94                                    | 88.0                             |
| methyl vinyl ether             | CH <sub>2</sub> =CHOMe ( <i>C<sub>s</sub></i> )                           | C1  | 21.69                | 161.79                                   | 152.9                            |
|                                |                                                                           | C2  | 99.37                | 84.11                                    | 85.5                             |
| acrolein                       | CH <sub>2</sub> =CHCHO ( <i>C<sub>s</sub></i> )                           | C4  | 35.80                | 147.69                                   | 138.5                            |
|                                |                                                                           | C1  | 40.42                | 143.07                                   | 138.0                            |
| methyl vinyl ketone            | CH <sub>2</sub> =CHCOCH <sub>3</sub> ( <i>C<sub>s</sub></i> )             | C4  | 36.01                | 147.47                                   | 137.5                            |
|                                |                                                                           | C1  | 50.36                | 133.13                                   | 129.0                            |
| <i>cis</i> -acrylic acid       | <i>c</i> -CH <sub>2</sub> =CHCOOH ( <i>C<sub>s</sub></i> )                | C4  | 49.85                | 133.64                                   | 128.1                            |
|                                |                                                                           | C1  | 42.85                | 140.64                                   | 133.2                            |
| <i>trans</i> -acrylic acid     | <i>t</i> -CH <sub>2</sub> =CHCOOH ( <i>C<sub>s</sub></i> )                | C2  | 47.28                | 136.21                                   | 128.1                            |
|                                |                                                                           | C1  | 45.34                | 138.14                                   | 133.2                            |
| nitroethylene                  | CH <sub>2</sub> =CHNO <sub>2</sub> ( <i>C<sub>s</sub></i> )               | C4  | 28.53                | 154.95                                   | 144.7                            |
|                                |                                                                           | C1  | 55.55                | 127.94                                   | 121.5                            |
| isocyanoethylene               | CH <sub>2</sub> =CHNC ( <i>C<sub>s</sub></i> )                            | C1  | 58.32                | 125.17                                   | 121.0                            |
|                                |                                                                           | C4  | 57.49                | 126.00                                   | 119.3                            |
| <i>N,N</i> -dimethylethenamine | ( <i>C<sub>1</sub></i> )                                                  | C13 | 167.52               | 15.97                                    | 12.8                             |
|                                |                                                                           | C10 | 125.06               | 58.43                                    | 53.6                             |
|                                |                                                                           | C1  | 133.25               | 50.24                                    | 44.6                             |

**Table S10.** The  $-\Delta\sigma^t(C_i: i = 1-5)_{\text{calcd:TMS}}$  and  $\delta(C_i: i = 1-5)_{\text{obsd:TMS}}$  for some conformers in *n*-Pentane, calculated with the GIAO-DFT method under B3LYP/BSS-A.<sup>a</sup>

| Species <sup>b</sup>        | $\Delta E^a/\text{kJmol}^{-1}$ | $-\Delta\sigma^t(\text{C1})_{\text{TMS}}$ | $-\Delta\sigma^t(\text{C2})_{\text{TMS}}$ | $-\Delta\sigma^t(\text{C3})_{\text{TMS}}$ | $-\Delta\sigma^t(\text{C4})_{\text{TMS}}$ | $-\Delta\sigma^t(\text{C5})_{\text{TMS}}$ |
|-----------------------------|--------------------------------|-------------------------------------------|-------------------------------------------|-------------------------------------------|-------------------------------------------|-------------------------------------------|
| tt                          | 0.00                           | 17.44                                     | 30.67                                     | 42.05                                     | 30.67                                     | 17.44                                     |
| tg                          | 3.69                           | 15.05                                     | 28.70                                     | 39.53                                     | 26.74                                     | 17.53                                     |
| gt                          | 7.21                           | 13.87                                     | 23.72                                     | 38.12                                     | 23.72                                     | 13.87                                     |
| ggA                         | 6.75                           | 13.53                                     | 22.17                                     | 34.86                                     | 22.17                                     | 13.53                                     |
| ggB                         | 14.25                          | 17.04                                     | 31.57                                     | 36.40                                     | 29.53                                     | 19.91                                     |
| $\delta(C_i)_{\text{obsd}}$ | --                             | 14.20                                     | 22.80                                     | 34.80                                     | 22.80                                     | 14.20                                     |

<sup>a</sup> $-\Delta\sigma^t(\text{C})_{\text{calcd:TMS}} = -[\sigma^t(\text{C: } n\text{-pentane})_{\text{calcd}} - [\sigma^t(\text{C: TMS})_{\text{calcd}}]$ .

<sup>b</sup>

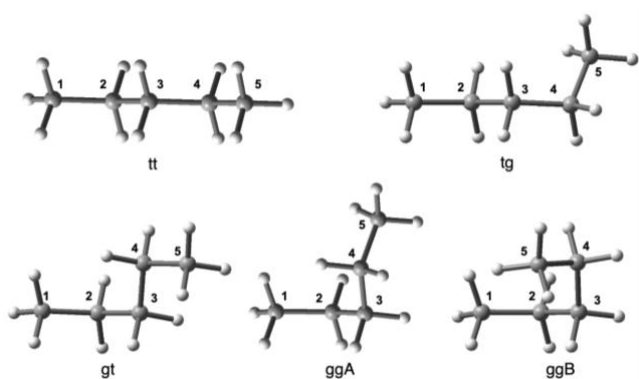

**Table S11.** The  $\sigma^m(\text{C: S})$ ,  $\Delta\sigma^m(\text{C: S})$  and  $\Delta\sigma^m(\text{C: S})_e$  ( $m = \text{d, p and t}$ ) for various species of **1–56** and **S1–S20**, along with the pre- $\alpha$ ,  $\alpha$ ,  $\beta$ ,  $\gamma$ ,  $\delta$ ,  $\alpha\text{-X}$ ,  $\beta\text{-X}$  and *ipso*- $\text{X}$  (*i*- $\text{X}$ ) effects and the effects from the characteristic bonds and groups,<sup>a,b</sup> together with the  $Q(\text{C})$  values.

| Nos.       | Species                                    | sym            | $Q(\text{C})$ | $\sigma^{\text{d}}(\text{C})$ | $\sigma^{\text{p}}(\text{C})^c$ | $\sigma^{\text{t}}(\text{C})$ | $\Delta\sigma^{\text{t}}(\text{C})$ | $\Delta\sigma^{\text{d}}(\text{C})_e^d$ | $\Delta\sigma^{\text{p}}(\text{C})_e^d$ | $\Delta\sigma^{\text{t}}(\text{C})_e^d$ | effect        |
|------------|--------------------------------------------|----------------|---------------|-------------------------------|---------------------------------|-------------------------------|-------------------------------------|-----------------------------------------|-----------------------------------------|-----------------------------------------|---------------|
| <b>1</b>   | $\text{C}^{4-}$                            | $O_h$          | -4.000        | 274.39                        | 0.00                            | 274.39                        | 0.00                                | 0.00                                    | 0.00                                    | 0.00                                    | ---           |
| <b>2</b>   | $\text{HC}^{3-}$                           | $C_{\infty v}$ | -1.815        | 264.04                        | 1807.41                         | 2071.45                       | 1797.06                             | -10.35                                  | 1807.41                                 | 1797.06                                 | pre- $\alpha$ |
| <b>3</b>   | $\text{H}_2\text{C}^{2-}$                  | $C_{2v}$       | -2.156        | 261.96                        | 137.46                          | 399.42                        | 125.03                              | -6.22                                   | 68.73                                   | 62.51                                   | pre- $\alpha$ |
| <b>4</b>   | $\text{H}_3\text{C}^-$                     | $C_{3v}$       | -1.400        | 249.53                        | -2.26                           | 247.26                        | -27.13                              | -8.29                                   | -0.75                                   | -9.04                                   | pre- $\alpha$ |
| <b>5</b>   | $\text{CH}_4$                              | $T_d$          | -0.805        | 238.98                        | -49.66                          | 189.32                        | -85.08                              | -8.85                                   | -12.42                                  | -21.27                                  | pre- $\alpha$ |
| <b>6</b>   | $\text{MeH}_2\text{C}^-$                   | $C_s$          | -1.000        | 250.87                        | -98.55                          | 152.32                        | -122.08                             | 1.34                                    | -96.29                                  | -94.95                                  | $\alpha$      |
| <b>7</b>   | $\text{EtH}_2\text{C}^-$                   | $C_s$          | -0.915        | 248.89                        | -82.29                          | 166.59                        | -107.80                             | -1.98                                   | 16.26                                   | 14.28                                   | $\beta$       |
| <b>8</b>   | <i>i</i> -PrH <sub>2</sub> C <sup>-</sup>  | $C_1$          | -0.923        | 236.54                        | -94.11                          | 142.43                        | -131.96                             | -7.16                                   | 2.22                                    | -4.94                                   | $\beta$       |
| <b>9</b>   | <i>t</i> -BuH <sub>2</sub> C <sup>-</sup>  | $C_s$          | -0.985        | 236.18                        | -62.01                          | 174.16                        | -100.23                             | -4.90                                   | 12.18                                   | 7.28                                    | $\beta$       |
| <b>10</b>  | <i>n</i> -PrH <sub>2</sub> C <sup>-</sup>  | $C_s$          | -0.990        | 260.85                        | -87.90                          | 172.96                        | -101.44                             | 11.97                                   | -5.61                                   | -5.61                                   | $\gamma$      |
| <b>11</b>  | <i>n</i> -BuH <sub>2</sub> C <sup>-</sup>  | $C_s$          | -0.938        | 262.85                        | -88.82                          | 174.03                        | -100.37                             | 1.99                                    | -0.92                                   | 1.07                                    | $\delta$      |
| <b>12</b>  | $\text{MeCH}_3$                            | $D_{3d}$       | -0.571        | 238.60                        | -65.21                          | 173.39                        | -101.00                             | -0.38                                   | -15.55                                  | -15.92                                  | $\alpha$      |
| <b>13a</b> | $\text{EtCH}_3$                            | $C_{2v}$       | -0.568        | 232.81                        | -68.71                          | 164.10                        | -110.30                             | -5.79                                   | -3.51                                   | -9.29                                   | $\beta$       |
| <b>13b</b> | $\text{Me}_2\text{CH}_2$                   | $C_{2v}$       | -0.382        | 251.23                        | -91.12                          | 160.10                        | -114.29                             | 6.12                                    | -20.73                                  | -14.61                                  | $\alpha$      |
| <b>14a</b> | <i>i</i> -PrCH <sub>3</sub>                | $C_{3v}$       | -0.565        | 230.20                        | -73.87                          | 156.33                        | -118.06                             | -4.20                                   | -4.33                                   | -8.53                                   | $\beta$       |
| <b>14b</b> | $\text{Me}_3\text{CH}$                     | $C_{3v}$       | -0.232        | 267.54                        | -114.35                         | 153.19                        | -121.21                             | 9.52                                    | -21.56                                  | -12.04                                  | $\alpha$      |
| <b>15</b>  | <i>t</i> -BuCH <sub>3</sub>                | $T_d$          | -0.563        | 229.82                        | -78.63                          | 151.19                        | -123.20                             | -2.93                                   | -4.47                                   | -7.40                                   | $\beta$       |
| <b>16a</b> | <i>n</i> -PrCH <sub>3</sub>                | $C_{2h}$       | -0.565        | 236.01                        | -70.67                          | 165.34                        | -109.05                             | 3.20                                    | -1.96                                   | 1.24                                    | $\gamma$      |
| <b>16b</b> | $\text{EtMeCH}_2$                          | $C_{2h}$       | -0.377        | 244.34                        | -93.60                          | 150.74                        | -123.66                             | -6.89                                   | -2.48                                   | -9.37                                   | $\beta$       |
| <b>17a</b> | <i>n</i> -BuCH <sub>3</sub>                | $C_{2v}$       | -0.375        | 233.25                        | -67.69                          | 165.55                        | -108.84                             | -2.77                                   | 2.98                                    | 0.21                                    | $\delta$      |
| <b>17b</b> | <i>n</i> -PrMeCH <sub>2</sub>              | $C_{2v}$       | -0.564        | 252.13                        | -99.81                          | 152.32                        | -122.08                             | 7.79                                    | -6.21                                   | 1.58                                    | $\gamma$      |
| <b>18a</b> | <i>i</i> -PrMeCH <sub>2</sub>              | $C_1$          | -0.372        | 247.55                        | -102.18                         | 145.37                        | -129.02                             | -1.84                                   | -5.53                                   | -7.37                                   | $\beta$       |
| <b>18b</b> | $\text{EtMe}_2\text{CH}$                   | $C_1$          | -0.225        | 265.39                        | -118.76                         | 146.63                        | -127.77                             | -2.15                                   | -4.41                                   | -6.56                                   | $\beta$       |
| <b>19</b>  | <i>t</i> -BuMeCH <sub>2</sub>              | $C_s$          | -0.371        | 251.79                        | -112.21                         | 139.58                        | -134.81                             | 0.19                                    | -7.03                                   | -6.84                                   | $\beta$       |
| <b>20</b>  | <i>n</i> -BuMeCH <sub>2</sub>              | $C_{2h}$       | -0.374        | 243.63                        | -101.29                         | 142.33                        | -132.06                             | -8.50                                   | -1.48                                   | -9.98                                   | $\delta$      |
| <b>21</b>  | <i>i</i> -PrMe <sub>2</sub> CH             | $C_{2h}$       | -0.219        | 259.35                        | -118.14                         | 141.21                        | -133.18                             | -4.10                                   | -1.89                                   | -5.99                                   | $\beta$       |
| <b>22</b>  | <i>t</i> -BuMe <sub>2</sub> CH             | $C_s$          | -0.215        | 265.19                        | -127.39                         | 137.80                        | -136.60                             | -0.78                                   | -4.35                                   | -5.13                                   | $\beta$       |
| <b>23</b>  | <i>n</i> -PrMe <sub>2</sub> CH             | $C_1$          | -0.224        | 274.83                        | -128.33                         | 146.50                        | -127.90                             | 9.44                                    | -9.57                                   | -0.13                                   | $\gamma$      |
| <b>24</b>  | <i>n</i> -BuMe <sub>2</sub> CH             | $C_1$          | -0.223        | 276.20                        | -128.65                         | 147.55                        | -126.84                             | 1.37                                    | -0.31                                   | 1.06                                    | $\delta$      |
| <b>25</b>  | $\text{H}_3\text{C}^+$                     | $C_{3v}$       | 0.362         | 240.45                        | -467.68                         | -227.23                       | -501.62                             | 1.48                                    | -418.02                                 | -416.55                                 | <i>e</i>      |
| <b>26</b>  | $\text{MeH}_2\text{C}^+$                   | $C_s$          | -0.215        | 242.18                        | -219.86                         | 22.32                         | -252.08                             | 1.73                                    | 247.82                                  | 249.55                                  | $\alpha$      |
| <b>27</b>  | $\text{EtH}_2\text{C}^+$                   | $C_s$          | -0.256        | 242.53                        | -140.46                         | 102.07                        | -172.33                             | 0.35                                    | 79.40                                   | 79.75                                   | $\beta$       |
| <b>28</b>  | <i>i</i> -PrH <sub>2</sub> C <sup>+</sup>  | $C_1$          | -0.472        | 256.69                        | -139.73                         | 116.96                        | -157.44                             | 7.26                                    | 40.07                                   | 47.32                                   | $\beta$       |
| <b>29</b>  | <i>t</i> -BuH <sub>2</sub> C <sup>+</sup>  | $C_1$          | -0.489        | 270.61                        | -149.75                         | 120.85                        | -153.54                             | 9.48                                    | 23.37                                   | 32.84                                   | $\beta$       |
| <b>30</b>  | $\text{Me}_2\text{HC}^+$                   | $C_2$          | 0.396         | 247.98                        | -400.37                         | -152.39                       | -426.79                             | 3.76                                    | 33.66                                   | 37.42                                   | $\alpha$      |
| <b>31</b>  | $\text{EtMeHC}^+$                          | $C_1$          | 0.366         | 256.56                        | -396.76                         | -140.20                       | -414.59                             | 8.58                                    | 3.61                                    | 12.19                                   | $\beta$       |
| <b>32</b>  | <i>i</i> -PrMeHC <sup>+</sup>              | $C_1$          | 0.174         | 268.19                        | -284.57                         | -16.39                        | -290.78                             | 10.10                                   | 57.90                                   | 68.00                                   | $\beta$       |
| <b>33</b>  | <i>t</i> -BuMeHC <sup>+</sup>              | $C_1$          | -0.327        | 293.49                        | -182.60                         | 110.89                        | -163.50                             | 15.17                                   | 72.59                                   | 87.76                                   | $\beta$       |
| <b>34</b>  | $\text{Me}_3\text{C}^+$                    | $C_1$          | 0.536         | 242.28                        | -411.12                         | -168.84                       | -443.23                             | 0.61                                    | 18.86                                   | 19.46                                   | $\alpha$      |
| <b>35</b>  | $\text{EtMe}_2\text{C}^+$                  | $C_1$          | 0.540         | 242.21                        | -414.36                         | -172.15                       | -446.55                             | -0.07                                   | -3.24                                   | -3.31                                   | $\beta$       |
| <b>36</b>  | <i>i</i> -PrMe <sub>2</sub> C <sup>+</sup> | $C_1$          | 0.544         | 242.44                        | -404.51                         | -162.07                       | -436.46                             | 0.08                                    | 3.30                                    | 3.39                                    | $\beta$       |
| <b>37</b>  | <i>t</i> -BuMe <sub>2</sub> C <sup>+</sup> | $C_1$          | 0.537         | 242.76                        | -402.64                         | -159.88                       | -434.27                             | 0.16                                    | 2.83                                    | 2.99                                    | $\beta$       |

<sup>a</sup>Calculated with the GIAO-DFT method under B3LYP/BSS-A. <sup>b</sup> $\Delta\sigma^m(\text{C: S}) = \sigma^m(\text{C: S}) - \sigma^m(\text{C: C}^{4-})$  ( $m = \text{d, p and t}$ ).

<sup>c</sup> $\Delta\sigma^{\text{p}}(\text{C}) = \sigma^{\text{p}}(\text{C})$ , since  $\sigma^{\text{p}}(\text{C: C}^{4-}) = 0$  ppm. <sup>d</sup> $\Delta\sigma^m(\text{C: S}) = (1/n)(\Delta\sigma^m(\text{C: S}) - \Delta\sigma^m(\text{C: S}_e))$ , see text for  $n$ ,  $S$  and  $S_e$  ( $m = \text{d, p and t}$ ). <sup>e</sup>The effect being not defined.

(Table S11 continues)

| Nos.        | Species                                            | sym             | Q(C)   | $\sigma^d(\text{C})$ | $\sigma^p(\text{C})^c$ | $\sigma^t(\text{C})$ | $\Delta\sigma^t(\text{C})$ | $\Delta\sigma^d(\text{C})_e^d$ | $\Delta\sigma^p(\text{C})_e^d$ | $\Delta\sigma^t(\text{C})_e^d$ | effect                        |
|-------------|----------------------------------------------------|-----------------|--------|----------------------|------------------------|----------------------|----------------------------|--------------------------------|--------------------------------|--------------------------------|-------------------------------|
| <b>38</b>   | CH <sub>3</sub> OH                                 | C <sub>s</sub>  | -0.191 | 232.16               | -104.67                | 127.49               | -146.90                    | -6.82                          | -55.01                         | -61.82                         | $\alpha$ -X                   |
| <b>39</b>   | CH <sub>3</sub> SH                                 | C <sub>s</sub>  | -0.692 | 243.86               | -73.63                 | 170.23               | -104.16                    | 4.88                           | -23.97                         | -19.09                         | $\alpha$ -X                   |
| <b>40</b>   | CH <sub>3</sub> SeH                                | C <sub>s</sub>  | -0.737 | 240.42               | -66.34                 | 174.08               | -100.31                    | 1.45                           | -16.68                         | -15.23                         | $\alpha$ -X                   |
| <b>41</b>   | H <sub>3</sub> CSSCH <sub>3</sub>                  | C <sub>2</sub>  | -0.709 | 241.38               | -85.75                 | 155.63               | -118.77                    | 2.40                           | -36.09                         | -33.69                         | $\alpha$ -X                   |
| <b>42</b>   | CH <sub>3</sub> F                                  | C <sub>3v</sub> | -0.066 | 232.99               | -126.01                | 106.99               | -167.41                    | -5.98                          | -76.35                         | -82.33                         | $\alpha$ -X                   |
| <b>43</b>   | CH <sub>3</sub> Cl                                 | C <sub>3v</sub> | -0.529 | 243.61               | -93.19                 | 150.42               | -123.98                    | 4.63                           | -43.53                         | -38.90                         | $\alpha$ -X                   |
| <b>44</b>   | CH <sub>3</sub> Br                                 | C <sub>3v</sub> | -0.601 | 241.70               | -83.06                 | 158.65               | -115.75                    | 2.73                           | -33.40                         | -30.67                         | $\alpha$ -X                   |
| <b>45</b>   | CH <sub>3</sub> I                                  | C <sub>3v</sub> | -0.719 | 236.32               | -56.17                 | 180.15               | -94.24                     | -2.66                          | -6.51                          | -9.17                          | $\alpha$ -X                   |
| <b>46</b>   | CH <sub>3</sub> CO <sub>2</sub> Me                 | C <sub>s</sub>  | -0.666 | 248.04               | -87.22                 | 160.82               | -113.58                    | 9.06                           | -37.56                         | -28.50                         | $\alpha$ -X                   |
| <b>47</b>   | CH <sub>3</sub> CN                                 | C <sub>3v</sub> | -0.677 | 220.25               | -38.56                 | 181.70               | -92.70                     | -18.72                         | 11.10                          | -7.62                          | $\alpha$ -X                   |
| <b>48</b>   | CH <sub>3</sub> NH <sub>2</sub>                    | C <sub>1</sub>  | -0.360 | 229.80               | -79.79                 | 150.01               | -124.39                    | -9.18                          | -30.13                         | -39.31                         | $\alpha$ -X                   |
| <b>49</b>   | CH <sub>3</sub> NO <sub>2</sub>                    | C <sub>s</sub>  | -0.410 | 231.58               | -114.08                | 117.50               | -156.90                    | -7.40                          | -64.42                         | -71.82                         | $\alpha$ -X                   |
| <b>50a</b>  | CH <sub>3</sub> CH <sub>2</sub> OH                 | C <sub>s</sub>  | -0.016 | 225.96               | -108.36                | 117.60               | -156.80                    | -12.64                         | -43.15                         | -55.79                         | $\alpha$ -X                   |
| <b>50b</b>  | CH <sub>3</sub> CH <sub>2</sub> OH                 |                 | -0.587 | 245.33               | -81.19                 | 164.14               | -110.26                    | 6.73                           | -15.98                         | -9.25                          | $\beta$ -X                    |
| <b>S1a</b>  | CH <sub>3</sub> CH <sub>2</sub> SH                 | C <sub>s</sub>  | -0.484 | 250.44               | -95.01                 | 155.44               | -118.96                    | 11.84                          | -29.80                         | -17.96                         | $\alpha$ -X                   |
| <b>S1b</b>  | CH <sub>3</sub> CH <sub>2</sub> SH                 |                 | -0.583 | 236.08               | -69.55                 | 166.53               | -107.86                    | -2.51                          | -4.34                          | -6.86                          | $\beta$ -X                    |
| <b>S2a</b>  | CH <sub>3</sub> CH <sub>2</sub> SeH                | C <sub>s</sub>  | -0.521 | 243.61               | -86.59                 | 157.02               | -117.37                    | 5.01                           | -21.38                         | -16.37                         | $\alpha$ -X                   |
| <b>S2b</b>  | CH <sub>3</sub> CH <sub>2</sub> SeH                |                 | -0.589 | 239.54               | -72.79                 | 166.75               | -107.64                    | 0.94                           | -7.58                          | -6.64                          | $\beta$ -X                    |
| <b>S3a</b>  | CH <sub>3</sub> CH <sub>2</sub> F                  | C <sub>s</sub>  | 0.103  | 242.30               | -77.83                 | 164.47               | -109.92                    | 3.71                           | -12.63                         | -8.92                          | $\alpha$ -X                   |
| <b>S3b</b>  | CH <sub>3</sub> CH <sub>2</sub> F                  |                 | -0.610 | 228.26               | -132.05                | 96.21                | -178.19                    | -10.34                         | -66.85                         | -77.18                         | $\beta$ -X                    |
| <b>S4a</b>  | CH <sub>3</sub> CH <sub>2</sub> Cl                 | C <sub>s</sub>  | -0.332 | 254.00               | -121.40                | 132.61               | -141.79                    | 15.41                          | -56.19                         | -40.79                         | $\alpha$ -X                   |
| <b>S4b</b>  | CH <sub>3</sub> CH <sub>2</sub> Cl                 |                 | -0.588 | 231.68               | -70.51                 | 161.17               | -113.23                    | -6.92                          | -5.30                          | -12.22                         | $\beta$ -X                    |
| <b>S5a</b>  | CH <sub>3</sub> CH <sub>2</sub> Br                 | C <sub>s</sub>  | -0.392 | 247.97               | -110.45                | 137.53               | -136.87                    | 9.38                           | -45.24                         | -35.87                         | $\alpha$ -X                   |
| <b>S5b</b>  | CH <sub>3</sub> CH <sub>2</sub> Br                 |                 | -0.592 | 235.52               | -74.81                 | 160.71               | -113.68                    | -3.08                          | -9.60                          | -12.68                         | $\beta$ -X                    |
| <b>S6a</b>  | CH <sub>3</sub> CH <sub>2</sub> I                  | C <sub>s</sub>  | -0.491 | 244.82               | -89.98                 | 154.84               | -119.56                    | 6.22                           | -24.77                         | -18.55                         | $\alpha$ -X                   |
| <b>S6b</b>  | CH <sub>3</sub> CH <sub>2</sub> I                  |                 | -0.594 | 232.06               | -72.45                 | 159.60               | -114.79                    | -6.54                          | -7.25                          | -13.79                         | $\beta$ -X                    |
| <b>S7a</b>  | CH <sub>3</sub> CH <sub>2</sub> CO <sub>2</sub> Me | C <sub>s</sub>  | -0.475 | 278.88               | -127.14                | 151.73               | -122.66                    | 40.28                          | -61.94                         | -21.66                         | $\alpha$ -X                   |
| <b>S7b</b>  | CH <sub>3</sub> CH <sub>2</sub> CO <sub>2</sub> Me |                 | -0.569 | 223.20               | -51.08                 | 172.13               | -102.27                    | -15.39                         | 14.13                          | -1.26                          | $\beta$ -X                    |
| <b>S8a</b>  | CH <sub>3</sub> CH <sub>2</sub> CN                 | C <sub>s</sub>  | -0.484 | 235.78               | -66.79                 | 168.99               | -105.40                    | -2.82                          | -1.58                          | -4.40                          | $\alpha$ -X                   |
| <b>S8b</b>  | CH <sub>3</sub> CH <sub>2</sub> CN                 |                 | -0.554 | 221.77               | -52.62                 | 169.15               | -105.25                    | -16.83                         | 12.59                          | -4.24                          | $\beta$ -X                    |
| <b>S9a</b>  | CH <sub>3</sub> CH <sub>2</sub> NH <sub>2</sub>    | C <sub>s</sub>  | -0.182 | 237.44               | -99.33                 | 138.11               | -136.28                    | -1.16                          | -34.12                         | -35.28                         | $\alpha$ -X                   |
| <b>S9b</b>  | CH <sub>3</sub> CH <sub>2</sub> NH <sub>2</sub>    |                 | -0.586 | 236.72               | -79.48                 | 157.24               | -117.15                    | -1.87                          | -14.27                         | -16.15                         | $\beta$ -X                    |
| <b>S10a</b> | CH <sub>3</sub> CH <sub>2</sub> NO <sub>2</sub>    | C <sub>s</sub>  | -0.222 | 239.28               | -131.11                | 108.17               | -166.22                    | 0.68                           | -65.90                         | -65.22                         | $\alpha$ -X                   |
| <b>S10b</b> | CH <sub>3</sub> CH <sub>2</sub> NO <sub>2</sub>    |                 | -0.597 | 238.65               | -68.48                 | 170.18               | -104.22                    | 0.06                           | -3.27                          | -3.22                          | $\beta$ -X                    |
| <b>51</b>   | H <sub>2</sub> C=CH <sub>2</sub>                   | D <sub>2h</sub> | -0.365 | 246.91               | -194.83                | 52.08                | -222.31                    | 8.31                           | -129.62                        | -121.31                        | C <sub>2</sub> H <sub>4</sub> |
| <b>52</b>   | HC≡CH                                              | D <sub>∞h</sub> | -0.225 | 255.62               | -145.56                | 110.06               | -164.34                    | 17.03                          | -80.36                         | -63.33                         | C <sub>2</sub> H <sub>2</sub> |

<sup>a</sup>Calculated with the GIAO-DFT method under B3LYP/BSS-A. <sup>b</sup> $\Delta\sigma^m(\text{C}: \text{S}) = \sigma^m(\text{C}: \text{S}) - \sigma^m(\text{C}: \text{C}^{4-})$  ( $m = \text{d}, \text{p}$  and  $\text{t}$ ).  
<sup>c</sup> $\Delta\sigma^p(\text{C}) = \sigma^p(\text{C})$ , since  $\sigma^p(\text{C}: \text{C}^{4-}) = 0$  ppm. <sup>d</sup> $\Delta\sigma^m(\text{C}: \text{S}) = (1/n)(\Delta\sigma^m(\text{C}: \text{S}) - \Delta\sigma^m(\text{C}: \text{S}_e))$ , see text for  $n$ ,  $\text{S}$  and  $\text{S}_e$  ( $m = \text{d}, \text{p}$  and  $\text{t}$ ).

(Table S11 continues)

| Nos.       | Species                                                  | sym                   | Q(C)   | $\sigma^d(\text{C})$ | $\sigma^p(\text{C})^c$ | $\sigma^t(\text{C})$ | $\Delta\sigma^t(\text{C})$ | $\Delta\sigma^d(\text{C})_e^d$ | $\Delta\sigma^p(\text{C})_e^d$ | $\Delta\sigma^t(\text{C})_e^d$ | effect                        |
|------------|----------------------------------------------------------|-----------------------|--------|----------------------|------------------------|----------------------|----------------------------|--------------------------------|--------------------------------|--------------------------------|-------------------------------|
| <b>53</b>  | <b>C<sub>6</sub>H<sub>6</sub></b>                        | <i>D<sub>6h</sub></i> | -0.106 | 239.66               | -192.70                | 46.96                | -227.43                    | 1.06                           | -127.49                        | -126.43                        | C <sub>6</sub> H <sub>6</sub> |
|            |                                                          |                       | -0.240 | 240.22               | -193.26                | 46.96                | -227.44                    | 1.62                           | -128.06                        | -126.43                        | C <sub>6</sub> H <sub>6</sub> |
| <b>54</b>  | <b>C<sub>6</sub>H<sub>5</sub>OH (ipso)</b>               | <i>C<sub>s</sub></i>  | 0.449  | 258.53               | -243.01                | 15.52                | -258.88                    | 18.86                          | -50.31                         | -31.45                         | <i>i</i> -X                   |
| <b>S11</b> | <b>C<sub>6</sub>H<sub>5</sub>SH (ipso)</b>               | <i>C<sub>s</sub></i>  | -0.155 | 157.15               | -122.23                | 34.92                | -239.47                    | -82.51                         | 70.47                          | -12.04                         | <i>i</i> -X                   |
| <b>S12</b> | <b>C<sub>6</sub>H<sub>5</sub>SeH (ipso)</b>              | <i>C<sub>1</sub></i>  | -0.185 | 251.05               | -219.65                | 31.40                | -243.00                    | 11.38                          | -26.95                         | -15.57                         | <i>i</i> -X                   |
| <b>S13</b> | <b>C<sub>6</sub>H<sub>5</sub>F (ipso)</b>                | <i>C<sub>2v</sub></i> | 0.542  | 274.86               | -267.63                | 7.22                 | -267.17                    | 35.19                          | -74.93                         | -39.74                         | <i>i</i> -X                   |
| <b>S14</b> | <b>C<sub>6</sub>H<sub>5</sub>Cl (ipso)</b>               | <i>C<sub>2v</sub></i> | -0.038 | 213.33               | -181.55                | 31.78                | -242.62                    | -26.34                         | 11.15                          | -15.19                         | <i>i</i> -X                   |
| <b>S15</b> | <b>C<sub>6</sub>H<sub>5</sub>Br (ipso)</b>               | <i>C<sub>2v</sub></i> | -0.082 | 239.21               | -206.95                | 32.25                | -242.14                    | -0.46                          | -14.25                         | -14.71                         | <i>i</i> -X                   |
| <b>S16</b> | <b>C<sub>6</sub>H<sub>5</sub>I (ipso)</b>                | <i>C<sub>2v</sub></i> | -0.181 | 211.11               | -169.14                | 41.97                | -232.42                    | -28.55                         | 23.56                          | -4.99                          | <i>i</i> -X                   |
| <b>S17</b> | <b>C<sub>6</sub>H<sub>5</sub>CO<sub>2</sub>Me (ipso)</b> | <i>C<sub>s</sub></i>  | -0.043 | 200.85               | -156.64                | 44.21                | -230.18                    | -38.81                         | 36.06                          | -2.75                          | <i>i</i> -X                   |
| <b>S18</b> | <b>C<sub>6</sub>H<sub>5</sub>CN (ipso)</b>               | <i>C<sub>2v</sub></i> | -0.165 | 188.29               | -127.29                | 61.00                | -213.40                    | -51.37                         | 65.41                          | 14.04                          | <i>i</i> -X                   |
| <b>S19</b> | <b>C<sub>6</sub>H<sub>5</sub>NH<sub>2</sub> (ipso)</b>   | <i>C<sub>s</sub></i>  | 0.330  | 257.25               | -231.43                | 25.81                | -248.58                    | 17.59                          | -38.73                         | -21.15                         | <i>i</i> -X                   |
| <b>S20</b> | <b>C<sub>6</sub>H<sub>5</sub>NO<sub>2</sub> (ipso)</b>   | <i>C<sub>2v</sub></i> | 0.187  | 270.95               | -246.35                | 24.59                | -249.80                    | 31.29                          | -53.65                         | -22.37                         | <i>i</i> -X                   |
| <b>55</b>  | <b>H<sub>2</sub></b> C=O                                 | <i>C<sub>2v</sub></i> | 0.307  | 245.20               | -263.64                | -18.44               | -292.83                    | 13.05                          | -158.97                        | -145.93                        | C=O                           |
| <b>56</b>  | <b>H(HO)C=O</b>                                          | <i>C<sub>s</sub></i>  | 0.675  | 245.49               | -228.53                | 16.97                | -257.43                    | 13.34                          | -123.86                        | -110.53                        | OC=O                          |

<sup>a</sup>Calculated with the GIAO-DFT method under B3LYP/BSS-A. <sup>b</sup> $\Delta\sigma^m(\text{C: S}) = \sigma^m(\text{C: S}) - \sigma^m(\text{C: C}^{4-})$  ( $m = d, p$  and  $t$ ).

<sup>c</sup> $\Delta\sigma^p(\text{C}) = \sigma^p(\text{C})$ , since  $\sigma^p(\text{C: C}^{4-}) = 0$  ppm. <sup>d</sup> $\Delta\sigma^m(\text{C: S}) = (1/n)(\Delta\sigma^m(\text{C: S}) - \Delta\sigma^m(\text{C: S}_e))$ , see text for  $n, S$  and  $S_e$  ( $m = d, p$  and  $t$ ).

**Table S12.** The  $\sigma^m(\text{C: S})$  ( $m = \text{d, p and t}$ ),  $\sigma^{\text{p}_{i \rightarrow j}}$ ,  $\sigma^{\text{p}_{i \rightarrow j}}$ ,  $\Delta\sigma^{\text{t}}(\text{C: S})$  and  $\delta(\text{C})_{\text{obsd}}$  for various species of **1–56** and **S21–S70**.<sup>a</sup>

| Nos        | Species                                                                   | $\sigma^{\text{d}}$ | $\sigma^{\text{p}}$ | $\sigma^{\text{p}_{i \rightarrow j}}$ <sup>b</sup> | $\sigma^{\text{p}_{i \rightarrow a}}$ <sup>c</sup> | $\sigma^{\text{t}}$ | $\Delta\sigma^{\text{t}}(\text{C}^{4-})^{\text{d}}$ | $\Delta\sigma^{\text{t}}(\text{TMS})^{\text{d}}$ | $\delta(\text{C})_{\text{obsd}}^{\text{e}}$ |
|------------|---------------------------------------------------------------------------|---------------------|---------------------|----------------------------------------------------|----------------------------------------------------|---------------------|-----------------------------------------------------|--------------------------------------------------|---------------------------------------------|
| <b>1</b>   | <b>C<sup>4-</sup></b>                                                     | 274.39              | 0.00                | ---                                                | ---                                                | 274.39              | 0.00                                                | ---                                              | ---                                         |
| <b>S21</b> | <b>(CH<sub>3</sub>)<sub>4</sub>Si (<i>T<sub>d</sub></i>)</b>              | 248.95              | 65.96               | ---                                                | ---                                                | 182.99              | -91.40                                              | 0.00                                             | 0.0                                         |
| <b>5</b>   | <b>CH<sub>4</sub> (<i>T<sub>d</sub></i>)</b>                              | 238.98              | 49.66               | 125.55                                             | 175.21                                             | 189.32              | -85.07                                              | -6.33                                            | -4.6                                        |
| <b>12</b>  | <b>CH<sub>3</sub>CH<sub>3</sub> (<i>D<sub>3d</sub></i>)</b>               | 238.60              | 65.21               | 121.88                                             | 187.09                                             | 173.39              | -101.00                                             | 9.60                                             | 6.9                                         |
| <b>13</b>  | <b>CH<sub>3</sub>CH<sub>2</sub>CH<sub>3</sub> (<i>C<sub>2v</sub></i>)</b> | 251.23              | 91.12               | 83.64                                              | 174.77                                             | 160.10              | -114.29                                             | 22.89                                            | 16.4                                        |
| <b>17</b>  | <b><i>n</i>-C<sub>5</sub>H<sub>12</sub> (<i>C<sub>2v</sub></i>)</b>       | 236.68              | 95.74               | 124.40                                             | 220.14                                             | 140.94              | -133.45                                             | 42.05                                            | 34.2                                        |
| <b>S22</b> | <b><i>n</i>-C<sub>7</sub>H<sub>16</sub> (<i>C<sub>2v</sub></i>)</b>       | 251.38              | 107.31              | 88.74                                              | 196.05                                             | 144.07              | -130.32                                             | 38.92                                            | 29.3                                        |
| <b>S23</b> | <b><i>n</i>-nonane (<i>C<sub>2v</sub></i>)</b>                            | 246.58              | 102.38              | 116.20                                             | 218.58                                             | 144.20              | -130.19                                             | 38.79                                            | 29.8                                        |
| <b>S24</b> | <b><i>n</i>-undecane (<i>C<sub>2v</sub></i>)</b>                          | 257.19              | 112.95              | ---                                                | ---                                                | 144.24              | -130.15                                             | 38.75                                            | 29.9                                        |
| <b>S25</b> | <b><i>n</i>-tridecane (<i>C<sub>2v</sub></i>)</b>                         | 249.18              | 104.87              | ---                                                | ---                                                | 144.31              | -130.08                                             | 38.68                                            | 29.9                                        |
| <b>S26</b> | <b><i>n</i>-pentadecane (<i>C<sub>2v</sub></i>)</b>                       | 246.14              | 101.81              | ---                                                | ---                                                | 144.34              | -130.05                                             | 38.65                                            | 29.9                                        |
| <b>48</b>  | <b>CH<sub>3</sub>NH<sub>2</sub> (<i>C<sub>s</sub></i>)</b>                | 229.80              | 79.79               | 127.33                                             | 207.12                                             | 150.01              | -124.38                                             | 32.98                                            | 28.4                                        |
| <b>38</b>  | <b>CH<sub>3</sub>OH (<i>C<sub>s</sub></i>)</b>                            | 232.16              | 104.67              | 109.59                                             | 214.26                                             | 127.49              | -146.90                                             | 55.50                                            | 50.2                                        |
| <b>39</b>  | <b>CH<sub>3</sub>SH (<i>C<sub>s</sub></i>)</b>                            | 243.86              | 73.63               | 108.92                                             | 182.55                                             | 170.23              | -104.16                                             | 12.76                                            | 6.5                                         |
| <b>S27</b> | <b>CH<sub>3</sub>SCH<sub>3</sub> (<i>C<sub>2v</sub></i>)</b>              | 243.04              | 83.75               | 109.94                                             | 193.69                                             | 159.29              | -115.10                                             | 23.70                                            | 18.1                                        |
| <b>S28</b> | <b>CH<sub>3</sub>S(O)CH<sub>3</sub> (<i>C<sub>s</sub></i>)</b>            | 247.68              | 111.05              | 83.30                                              | 194.34                                             | 136.64              | -137.75                                             | 46.35                                            | 41.0                                        |
| <b>S29</b> | <b>CH<sub>3</sub>SO<sub>2</sub>CH<sub>3</sub> (<i>C<sub>2v</sub></i>)</b> | 245.01              | 107.45              | 95.39                                              | 202.85                                             | 137.56              | -136.83                                             | 45.43                                            | 42.6                                        |
| <b>S30</b> | <b>CH<sub>3</sub>SO<sub>3</sub>H (<i>C<sub>1</sub></i>)</b>               | 246.80              | 107.13              | 85.97                                              | 193.10                                             | 139.67              | -134.72                                             | 43.32                                            | 39.1                                        |
| <b>42</b>  | <b>CH<sub>3</sub>F (<i>C<sub>3v</sub></i>)</b>                            | 232.99              | 126.01              | 97.78                                              | 223.78                                             | 106.99              | -167.40                                             | 76.00                                            | 71.6                                        |
| <b>S31</b> | <b>CH<sub>2</sub>F<sub>2</sub> (<i>C<sub>2v</sub></i>)</b>                | 232.49              | 167.45              | 72.95                                              | 240.41                                             | 65.33               | -209.06                                             | 117.66                                           | 109.0                                       |
| <b>S32</b> | <b>CHF<sub>3</sub> (<i>C<sub>3v</sub></i>)</b>                            | 233.47              | 179.28              | 60.17                                              | 239.45                                             | 54.19               | -220.20                                             | 128.80                                           | 116.0                                       |
| <b>S33</b> | <b>CF<sub>4</sub> (<i>T<sub>d</sub></i>)</b>                              | 235.84              | 187.95              | 48.31                                              | 236.26                                             | 47.89               | -226.50                                             | 135.10                                           | 122.3                                       |
| <b>S34</b> | <b>(CH<sub>3</sub>)<sub>2</sub>NH (<i>C<sub>s</sub></i>)</b>              | 233.02              | 91.99               | 120.41                                             | 212.40                                             | 141.04              | -133.35                                             | 41.95                                            | 38.2                                        |
| <b>S35</b> | <b>(CH<sub>3</sub>)<sub>3</sub>N (<i>C<sub>3v</sub></i>)</b>              | 235.94              | 102.65              | 114.79                                             | 217.44                                             | 133.29              | -141.10                                             | 49.70                                            | 47.6                                        |
| <b>43</b>  | <b>CH<sub>3</sub>Cl (<i>C<sub>3v</sub></i>)</b>                           | 243.61              | 93.19               | 98.87                                              | 192.06                                             | 150.42              | -123.97                                             | 32.57                                            | 25.6                                        |
| <b>S36</b> | <b>CH<sub>2</sub>Cl<sub>2</sub> (<i>C<sub>2v</sub></i>)</b>               | 253.17              | 142.22              | 67.87                                              | 210.09                                             | 110.95              | -163.44                                             | 72.04                                            | 53.5                                        |
| <b>S37</b> | <b>CHCl<sub>3</sub> (<i>C<sub>3v</sub></i>)</b>                           | 267.64              | 194.69              | 26.77                                              | 221.46                                             | 72.95               | -201.44                                             | 110.04                                           | 77.2                                        |
| <b>S38</b> | <b>CCl<sub>4</sub> (<i>T<sub>d</sub></i>)</b>                             | 283.05              | 248.49              | 14.05                                              | 234.44                                             | 34.56               | -239.83                                             | 148.43                                           | 96.1                                        |
| <b>S39</b> | <b>CH<sub>3</sub>Br (<i>C<sub>3v</sub></i>)</b>                           | 241.70              | -83.06              | ---                                                | ---                                                | 158.65              | -115.74                                             | 24.34                                            | 9.6                                         |
| <b>S40</b> | <b>CH<sub>2</sub>Br<sub>2</sub> (<i>C<sub>2v</sub></i>)</b>               | 253.38              | -136.40             | ---                                                | ---                                                | 116.98              | -157.41                                             | 66.01                                            | 21.6                                        |
| <b>S41</b> | <b>CHBr<sub>3</sub> (<i>C<sub>3v</sub></i>)</b>                           | 266.11              | -194.70             | ---                                                | ---                                                | 71.41               | -202.98                                             | 111.58                                           | 11.0                                        |
| <b>S42</b> | <b>CBr<sub>4</sub> (<i>T<sub>d</sub></i>)</b>                             | 277.75              | -254.74             | ---                                                | ---                                                | 23.01               | -251.38                                             | 159.98                                           | -29.7                                       |
| <b>46</b>  | <b>CH<sub>3</sub>COOCH<sub>3</sub> (<i>C<sub>s</sub></i>)</b>             | 248.04              | 87.22               | 74.13                                              | 161.35                                             | 160.82              | -113.57                                             | 22.17                                            | 20.6                                        |
| <b>S43</b> | <b>CH<sub>3</sub>OCH<sub>3</sub> (<i>C<sub>2v</sub></i>)</b>              | 234.85              | 115.77              | 105.27                                             | 221.04                                             | 119.08              | -155.31                                             | 63.91                                            | 61.2                                        |
| <b>S44</b> | <b>CH<sub>3</sub>OEt (<i>C<sub>s</sub></i>)</b>                           | 235.22              | 114.82              | 105.92                                             | 220.74                                             | 120.39              | -154.00                                             | 62.60                                            | 64.3                                        |
| <b>S45</b> | <b>CH<sub>3</sub>OPr-<i>i</i> (<i>C<sub>1</sub></i>)</b>                  | 236.44              | 112.90              | 108.23                                             | 221.13                                             | 123.55              | -150.84                                             | 59.44                                            | 56.4                                        |
| <b>S46</b> | <b>CH<sub>3</sub>OBu-<i>t</i> (<i>C<sub>s</sub></i>)</b>                  | 236.89              | 106.15              | 112.12                                             | 218.27                                             | 130.74              | -143.65                                             | 52.25                                            | 50.1                                        |
| <b>47</b>  | <b>CH<sub>3</sub>CN (<i>C<sub>3v</sub></i>)</b>                           | 220.25              | 38.56               | 166.16                                             | 204.72                                             | 181.70              | -92.69                                              | 1.29                                             | 1.9                                         |
| <b>S47</b> | <b>CH<sub>3</sub>NC (<i>C<sub>3v</sub></i>)</b>                           | 233.20              | 76.83               | 120.88                                             | 171.36                                             | 156.37              | -118.02                                             | 26.62                                            | 25.9                                        |
| <b>49</b>  | <b>CH<sub>3</sub>NO<sub>2</sub> (<i>C<sub>s</sub></i>)</b>                | 231.58              | 114.08              | 107.14                                             | 221.22                                             | 117.50              | -156.89                                             | 65.49                                            | 62.5                                        |
| <b>S48</b> | <b>CH<sub>3</sub>CHO (<i>C<sub>s</sub></i>)</b>                           | 248.87              | 100.73              | 83.69                                              | 184.42                                             | 148.14              | -126.25                                             | 34.85                                            | 30.9                                        |
| <b>S49</b> | <b>CH<sub>3</sub>COCH<sub>3</sub> (<i>C<sub>2v</sub></i>)</b>             | 242.82              | 91.69               | 90.74                                              | 182.43                                             | 151.13              | -123.26                                             | 31.86                                            | 30.9                                        |
| <b>S50</b> | <b>CH<sub>3</sub>COOH (<i>C<sub>s</sub></i>)</b>                          | 248.81              | 86.56               | 79.87                                              | 166.43                                             | 162.24              | -112.15                                             | 20.75                                            | 20.8                                        |

<sup>a</sup>Calculated with the GIAO-DFT method under B3LYP/BSS-A. <sup>b</sup>Main contributions from the occupied-to-occupied orbital transitions on  $\sigma^{\text{p}}(\text{C})$ . <sup>c</sup>Main contributions from the occupied-to-unoccupied orbital transitions on  $\sigma^{\text{p}}(\text{C})$ . <sup>d</sup> $\Delta\sigma^{\text{p}}(\text{C: S}) = \sigma^{\text{p}}(\text{C: S}) - \sigma^{\text{p}}(\text{C: C}^{4-} \text{ or TMS})$ . <sup>e</sup>Observed values.

(Table S12 continues)

| Nos         | Species                                                                        | $\sigma^d$ | $\sigma^p$ | $\sigma^{p_{i \rightarrow j}}{}^b$ | $\sigma^{p_{i \rightarrow a}}{}^c$ | $\sigma^t$ | $\Delta\sigma^t(C^{4-})^d$ | $\Delta\sigma^t(TMS)^d$ | $\delta(C)_{\text{obsd}}{}^e$ |
|-------------|--------------------------------------------------------------------------------|------------|------------|------------------------------------|------------------------------------|------------|----------------------------|-------------------------|-------------------------------|
| <b>S51</b>  | CH <sub>2</sub> =CH <sub>2</sub> ( <i>D</i> <sub>2h</sub> )                    | 246.91     | 194.83     | 69.30                              | 264.12                             | 52.08      | -222.31                    | 130.91                  | 123.3                         |
| <b>S51</b>  | <i>c</i> -CH <sub>2</sub> =CHCH=CH <sub>2</sub> ( <i>C</i> <sub>2v</sub> )     | 249.95     | 201.24     | 80.13                              | 281.37                             | 48.70      | -225.69                    | 134.29                  | 124.0                         |
| <b>S52</b>  | <i>t</i> -CH <sub>2</sub> =CHCH=CH <sub>2</sub> ( <i>C</i> <sub>2h</sub> )     | 243.18     |            | 196.30                             | 91.77                              | 288.07     | 46.88                      | -227.51                 |                               |
|             | 136.11                                                                         | 125.0      |            |                                    |                                    |            |                            |                         |                               |
| <b>S53a</b> | CH <sub>2</sub> =CHCH <sub>3</sub> ( <i>C</i> <sub>s</sub> )                   | 257.27     | 220.07     | 42.14                              | 262.22                             | 37.20      | -237.19                    | 145.79                  | 133.9                         |
| <b>S53b</b> |                                                                                | 233.71     | 172.08     | 110.86                             | 282.94                             | 61.63      | -212.76                    | 121.36                  | 115.7                         |
| <b>S54a</b> | CH <sub>2</sub> =C(CH <sub>3</sub> ) <sub>2</sub> ( <i>C</i> <sub>2v</sub> )   | 257.96     |            | 231.96                             | 54.59                              | 286.55     | 26.00                      | -248.39                 |                               |
|             | 156.99                                                                         | 142.2      |            |                                    |                                    |            |                            |                         |                               |
| <b>S54b</b> |                                                                                |            | 230.39     | 163.89                             | 138.33                             | 302.22     | 66.50                      | -207.89                 | 116.49                        |
|             | 109.8                                                                          |            |            |                                    |                                    |            |                            |                         |                               |
| <b>S55a</b> | CH <sub>2</sub> =CHCH <sub>2</sub> CH <sub>3</sub> ( <i>C</i> <sub>1</sub> )   | 253.85     | 224.16     | 43.93                              | 268.09                             | 29.69      | -244.70                    | 153.30                  | 140.2                         |
| <b>S55b</b> |                                                                                | 226.97     | 163.70     | 137.06                             | 300.76                             | 63.27      | -211.12                    | 119.72                  | 113.5                         |
| <b>S56a</b> | CH <sub>2</sub> =CHCH(CH <sub>3</sub> ) <sub>2</sub> ( <i>C</i> <sub>1</sub> ) | 242.06     | 216.86     | 79.11                              | 295.96                             | 25.20      | -249.19                    | 157.79                  | 146.0                         |
| <b>S56b</b> |                                                                                | 226.45     | 159.59     | 138.69                             | 298.28                             | 66.86      | -207.53                    | 116.13                  | 111.3                         |
| <b>S57a</b> | CH <sub>2</sub> =CHC(CH <sub>3</sub> ) <sub>3</sub> ( <i>C</i> <sub>s</sub> )  | 252.36     | 232.00     | 41.11                              | 273.11                             | 20.35      | -254.04                    | 162.64                  | 149.8                         |
| <b>S57b</b> |                                                                                | 226.41     | 158.03     | 150.01                             | 308.04                             | 68.38      | -206.01                    | 114.61                  | 109.0                         |
| <b>S58a</b> | CH <sub>2</sub> =CHOH ( <i>C</i> <sub>s</sub> )                                | 244.16     | -217.60    | 58.85                              | -276.45                            | 26.57      | -247.82                    | 156.42                  | 149.0                         |
| <b>S58b</b> |                                                                                | 242.42     | -152.46    | 88.19                              | -240.65                            | 89.96      | -184.43                    | 93.03                   | 88.0                          |
| <b>S59a</b> | CH <sub>2</sub> =CH(OMe) ( <i>C</i> <sub>s</sub> )                             | 256.45     | -237.09    | 24.22                              | -261.31                            | 19.36      | -255.03                    | 163.63                  | 152.9                         |
| <b>S59b</b> |                                                                                | 240.60     | -143.09    | 103.16                             | -246.25                            | 97.51      | -176.88                    | 85.48                   | 85.5                          |
| <b>S60a</b> | CH <sub>2</sub> =CH(OCOCH <sub>3</sub> ) ( <i>C</i> <sub>s</sub> )             | 276.98     | -245.31    | ---                                | ---                                | 31.67      | -242.72                    | 151.32                  | 141.4                         |
| <b>S60b</b> |                                                                                | 218.39     | -134.85    | ---                                | ---                                | 83.53      | -190.86                    | 99.46                   | 97.5                          |
| <b>S61a</b> | CH <sub>2</sub> =CHF ( <i>C</i> <sub>s</sub> )                                 | 256.61     | -240.72    | 11.05                              | -251.77                            | 15.89      | -258.50                    | 167.10                  | 147.7                         |
| <b>S61b</b> |                                                                                | 240.84     | -157.23    | 96.96                              | -254.19                            | 83.61      | -190.78                    | 99.38                   | 88.5                          |
| <b>S62a</b> | CH <sub>2</sub> =CHCl ( <i>C</i> <sub>s</sub> )                                | 256.35     | -216.56    | 45.45                              | -262.01                            | 39.78      | -234.61                    | 143.21                  | 126.1                         |
| <b>S62b</b> |                                                                                | 242.92     | -182.88    | 83.68                              | -266.56                            | 60.04      | -214.35                    | 122.95                  | 117.4                         |
| <b>S63a</b> | CH <sub>2</sub> =CHCHO ( <i>C</i> <sub>s</sub> )                               | 268.90     | -235.82    | 9.94                               | -245.77                            | 33.08      | -241.31                    | 149.91                  | 138.5                         |
| <b>S63b</b> |                                                                                | 232.74     | -194.86    | 111.09                             | -305.96                            | 37.88      | -236.51                    | 145.11                  | 138.0                         |
| <b>S64a</b> | CH <sub>2</sub> =CHCOCH <sub>3</sub> ( <i>C</i> <sub>s</sub> )                 | 260.78     | -227.40    | 36.89                              | -264.30                            | 33.38      | -241.01                    | 149.61                  | 137.5                         |
| <b>S64b</b> |                                                                                | 220.24     | -172.23    | 147.25                             | -319.48                            | 48.01      | -226.38                    | 134.98                  | 129.0                         |
| <b>S65a</b> | <i>c</i> -CH <sub>2</sub> =CHCOOH ( <i>C</i> <sub>s</sub> )                    | 278.10     | 230.40     | 29.46                              | 200.93                             | 47.71      | -226.68                    | 135.28                  | 128.1                         |
| <b>S65b</b> |                                                                                | 226.69     | 186.51     | 132.80                             | 319.31                             | 40.18      | -234.21                    | 142.81                  | 133.2                         |
| <b>S66a</b> | <i>t</i> -CH <sub>2</sub> =CHCOOH ( <i>C</i> <sub>s</sub> )                    | 263.04     | 218.14     | 29.41                              | 247.55                             | 44.90      | -229.49                    | 138.09                  | 128.1                         |
| <b>S66b</b> |                                                                                | 234.03     | 191.03     | 101.51                             | 292.53                             | 43.00      | -231.39                    | 139.99                  | 133.2                         |
| <b>S67a</b> | CH <sub>2</sub> =CHNO <sub>2</sub> ( <i>C</i> <sub>s</sub> )                   | 268.67     | -242.12    | -5.40                              | -236.73                            | 26.55      | -247.84                    | 156.44                  | 144.7                         |
| <b>S67b</b> |                                                                                | 223.46     | -170.43    | 121.43                             | -291.87                            | 53.02      | -221.37                    | 129.97                  | 121.5                         |
| <b>S68a</b> | CH <sub>2</sub> =CHCN ( <i>C</i> <sub>s</sub> )                                | 208.39     | -142.42    | 176.84                             | -319.26                            | 65.97      | -208.42                    | 117.02                  | 107.8                         |
| <b>S68b</b> |                                                                                | 251.42     | -212.96    | 36.03                              | -248.99                            | 38.46      | -235.93                    | 144.53                  | 137.5                         |
| <b>S69a</b> | CH <sub>2</sub> =CHNC ( <i>C</i> <sub>s</sub> )                                | 262.73     | -207.62    | 7.57                               | -215.19                            | 55.11      | -219.28                    | 127.88                  | 121.0                         |
| <b>S69b</b> |                                                                                | 230.65     | -174.61    | 118.10                             | -292.71                            | 56.04      | -218.35                    | 126.95                  | 119.3                         |
| <b>S70a</b> | <i>N,N</i> -Me <sub>2</sub> EtN ( <i>C</i> <sub>1</sub> )                      | 259.79     | -229.47    | 31.16                              | -260.63                            | 30.32      | -244.07                    | 152.67                  | 144.5                         |
| <b>S70b</b> |                                                                                | 230.90     | -131.74    | 136.19                             | -267.93                            | 99.16      | -175.23                    | 83.83                   | 81.8                          |

<sup>a</sup>Calculated with the GIAO-DFT method under B3LYP/BSS-A. <sup>b</sup>Main contributions from the occupied-to-occupied orbital transitions on  $\sigma^p(C)$ . <sup>c</sup>Main contributions from the occupied-to-unoccupied orbital transitions on  $\sigma^p(C)$ .

<sup>d</sup> $\Delta\sigma^p(C: S) = \sigma^p(C: S) - \sigma^p(C: C^{4-} \text{ or TMS})$ . <sup>e</sup>Observed values.



**Table S13.** The  $\sigma^d(\text{C})$ ,  $\sigma^p(\text{C})$  and  $\sigma^t(\text{C})$  values of  $\text{CH}_3\text{NH}_2$  and  $\text{CH}_3\text{NO}_2$ , given separately by each  $\psi_i$ .<sup>a</sup>

| MO ( <i>i</i> in $\psi_i$ )                         | $\sigma^d_i(\text{C})$ | $\sigma^p_i(\text{C})$ | $\sigma^t_i(\text{C})$ |
|-----------------------------------------------------|------------------------|------------------------|------------------------|
| <b>CH<sub>3</sub>NH<sub>2</sub> (C<sub>s</sub>)</b> |                        |                        |                        |
| 1 (A'); 2 (A')                                      | 200.32                 | 0.03                   | 200.35                 |
| 3 (A')                                              | 6.57                   | -6.29                  | 0.28                   |
| 4 (A')                                              | 22.01                  | 4.47                   | 26.48                  |
| 5 (A'')                                             | 2.62                   | -18.33                 | -15.70                 |
| 6 (A')                                              | 2.50                   | -46.12                 | -43.62                 |
| 7 (A')                                              | 2.37                   | -60.62                 | -58.25                 |
| 8 (A'')                                             | -3.37                  | -61.13                 | -64.49                 |
| 9 (A')                                              | -3.23                  | -19.13                 | -22.37                 |
| $\Psi_{\text{occ}}$ to $\Psi_{\text{occ}}$          |                        | 127.33                 |                        |
| total                                               | 229.80                 | -79.79                 | 150.01                 |
| <b>CH<sub>3</sub>NO<sub>2</sub> (C<sub>s</sub>)</b> |                        |                        |                        |
| 1 (A')-4 (A')                                       | 200.29                 | 0.03                   | 200.32                 |
| 5 (A'); 6 (A'')                                     | 0.28                   | -2.00                  | -1.72                  |
| 7 (A'); 8 (A')                                      | 27.23                  | -2.54                  | 24.69                  |
| 9 (A')                                              | 2.44                   | -13.41                 | -10.97                 |
| 10 (A')                                             | 1.87                   | -3.54                  | -1.67                  |
| 11 (A'')                                            | 0.89                   | -11.81                 | -10.92                 |
| 12 (A'')                                            | -3.23                  | -81.05                 | -84.28                 |
| 13 (A')                                             | -3.43                  | -77.33                 | -80.76                 |
| 14 (A'')                                            | -0.02                  | -0.25                  | -0.28                  |
| 15 (A')                                             | 7.39                   | -12.65                 | -5.26                  |
| 16 (A'')                                            | -2.13                  | -16.67                 | -18.80                 |
| $\Psi_{\text{occ}}$ to $\Psi_{\text{occ}}$          |                        | 107.14                 |                        |
| total                                               | 231.58                 | -114.08                | 117.50                 |

<sup>a</sup>Calculated with the GIAO method under B3LYP/BSS-A.

**Table S14.** Main contributions from the  $\psi_i \rightarrow \psi_a$  transitions on  $\sigma^{P_{i \rightarrow a:kk}}(C)$  ( $k = x, y$  and/or  $z$ ) in  $\text{CH}_3\text{NH}_2$  and  $\text{CH}_3\text{NO}_2$ .<sup>a,b</sup>

| $i \rightarrow a^c$                                 | $\sigma^{P_{i \rightarrow a:xx}}(C)$ | $\sigma^{P_{i \rightarrow a:yy}}(C)$ | $\sigma^{P_{i \rightarrow a:zz}}(C)$ | $\sigma^{P_{i \rightarrow a}}(C)$ |
|-----------------------------------------------------|--------------------------------------|--------------------------------------|--------------------------------------|-----------------------------------|
| <b>CH<sub>3</sub>NH<sub>2</sub> (C<sub>s</sub>)</b> |                                      |                                      |                                      |                                   |
| 7→26                                                | 0.00                                 | 0.00                                 | -19.88                               | -6.63                             |
| 7→41                                                | 0.00                                 | 0.00                                 | -18.80                               | -6.27                             |
| 8→23                                                | -0.89                                | -31.43                               | 0.00                                 | -10.77                            |
| 8→26                                                | -22.94                               | -0.26                                | 0.00                                 | -7.73                             |
| 8→40                                                | -16.55                               | -1.82                                | 0.00                                 | -6.12                             |
| <b>CH<sub>3</sub>NO<sub>2</sub> (C<sub>s</sub>)</b> |                                      |                                      |                                      |                                   |
| 12→22                                               | -19.21                               | -0.65                                | 0.00                                 | -6.62                             |
| 12→28                                               | -28.68                               | -0.06                                | 0.00                                 | -9.58                             |
| 12→29                                               | -2.96                                | -29.16                               | 0.00                                 | -10.71                            |
| 12→50                                               | -8.52                                | -11.63                               | 0.00                                 | -6.72                             |
| 13→24                                               | 0.00                                 | 0.00                                 | -18.14                               | -6.05                             |
| 13→28                                               | 0.00                                 | 0.00                                 | -31.64                               | -10.55                            |
| 13→30                                               | 0.61                                 | -20.27                               | 0.00                                 | -6.55                             |

<sup>a</sup>Calculated with the GIAO method under B3LYP/BSS-A. <sup>b</sup>Magnitudes of  $\sigma^{P_{i \rightarrow a}}(C)$  larger than 6 ppm are shown. <sup>c</sup>In  $\psi_i \rightarrow \psi_a$ .

**Table S15.** The  $\sigma^d(C)$ ,  $\sigma^p(C)$  and  $\sigma(C)$  values of  $\text{C}_6\text{H}_5\text{OH}$  (C<sub>s</sub>), given separately by each  $\psi_i$ .<sup>a</sup>

| MO ( $i$ in $\psi_i$ )                     | $\sigma^d_i(C)$ | $\sigma^p_i(C)$ | $\sigma^t_i(C)$ |
|--------------------------------------------|-----------------|-----------------|-----------------|
| 1 (A')                                     | 0.00            | 0.00            | 0.01            |
| 2 (A')                                     | 200.29          | 0.00            | 200.29          |
| 3 (A')–7 (A')                              | 0.18            | 0.19            | 0.38            |
| 8 (A')–12 (A')                             | 34.07           | -24.22          | 9.84            |
| 13 (A')                                    | 1.85            | -9.58           | -7.73           |
| 14 (A')                                    | 3.85            | -25.61          | -21.76          |
| 15 (A')                                    | 1.88            | -8.29           | -6.41           |
| 16 (A')                                    | 4.58            | -34.11          | -29.53          |
| 17 (A')                                    | -7.87           | -54.23          | -62.10          |
| 18 (A')                                    | 8.21            | -8.07           | 0.14            |
| 19 (A')                                    | 13.08           | -21.65          | -8.57           |
| 20 (A'')                                   | -5.28           | -19.77          | -25.05          |
| 21 (A')                                    | 1.51            | -3.40           | -1.89           |
| 22 (A')                                    | -4.26           | -52.51          | -56.77          |
| 23 (A'')                                   | 1.72            | -0.79           | 0.92            |
| 24 (A'')                                   | 1.90            | -1.80           | 0.10            |
| 25 (A'')                                   | 5.27            | -14.78          | -9.51           |
| $\psi_{\text{occ}}$ to $\psi_{\text{occ}}$ |                 | 33.17           |                 |
| total                                      | 260.97          | -245.45         | 15.52           |

<sup>a</sup>Calculated with the GIAO method under B3LYP/BSS-A.

**Table S16.** Main contributions from the  $\psi_i \rightarrow \psi_a$  transitions on the  $\sigma^p(\text{C})$  of  $\text{C}_6\text{H}_5\text{OH}$  ( $C_s$ ).<sup>a,b</sup>

| $i \rightarrow a^b$ | $\sigma^p_{i \rightarrow a:xx}(\text{C})$ | $\sigma^p_{i \rightarrow a:yy}(\text{C})$ | $\sigma^p_{i \rightarrow a:zz}(\text{C})$ | $\sigma^p_{i \rightarrow a}(\text{C})$ |
|---------------------|-------------------------------------------|-------------------------------------------|-------------------------------------------|----------------------------------------|
| 12 $\rightarrow$ 87 | 2.65                                      | 15.40                                     | 0.00                                      | 6.01                                   |
| 14 $\rightarrow$ 28 | -26.78                                    | -0.11                                     | 0.00                                      | -8.96                                  |
| 16 $\rightarrow$ 28 | -19.19                                    | -53.50                                    | 0.00                                      | -24.23                                 |
| 17 $\rightarrow$ 28 | -25.53                                    | -12.31                                    | 0.00                                      | -12.62                                 |
| 17 $\rightarrow$ 87 | -24.92                                    | -2.75                                     | 0.00                                      | -9.22                                  |
| 18 $\rightarrow$ 28 | -0.68                                     | -43.06                                    | 0.00                                      | -14.58                                 |
| 18 $\rightarrow$ 87 | -0.18                                     | 20.94                                     | 0.00                                      | 6.92                                   |
| 20 $\rightarrow$ 28 | -14.26                                    | -18.78                                    | 0.00                                      | -11.01                                 |
| 21 $\rightarrow$ 28 | 17.26                                     | 3.31                                      | 0.00                                      | 6.86                                   |
| 22 $\rightarrow$ 28 | 0.60                                      | -17.40                                    | 0.00                                      | -5.60                                  |
| 22 $\rightarrow$ 38 | 0.24                                      | -16.23                                    | 0.00                                      | -5.33                                  |
| 22 $\rightarrow$ 44 | -1.68                                     | -28.12                                    | 0.00                                      | -9.93                                  |
| 22 $\rightarrow$ 54 | -0.98                                     | -24.48                                    | 0.00                                      | -8.49                                  |

<sup>a</sup>Calculated with the GIAO method under B3LYP/BSS-A. <sup>b</sup>The magnitudes of  $\sigma^p_{i \rightarrow a}(\text{C})$  larger than 5 ppm are shown. <sup>c</sup>In  $\psi_i \rightarrow \psi_a$ .

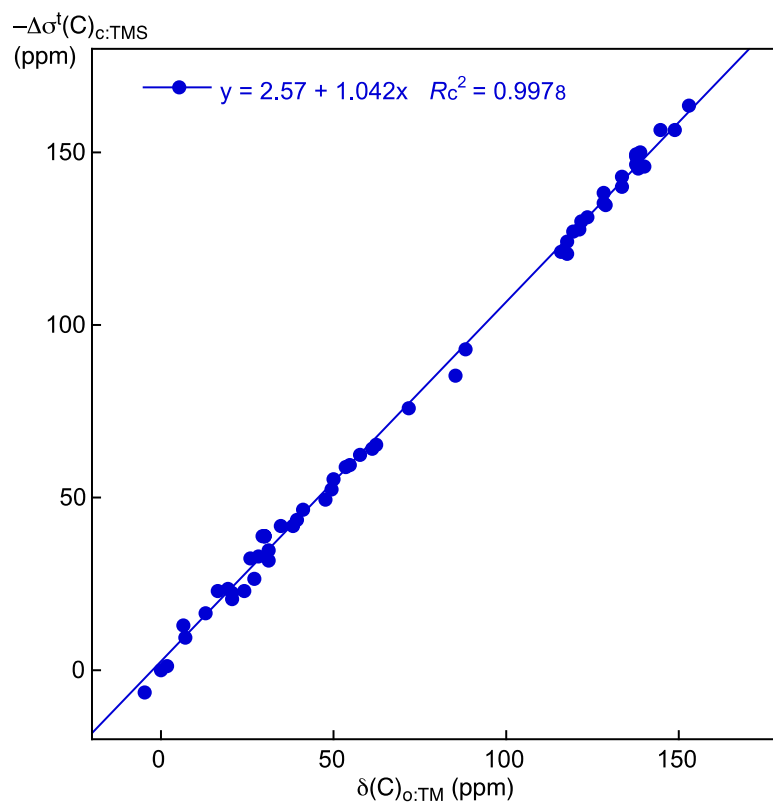

**Fig. S1** Plot of  $\delta(\text{C}: \text{S})_{\text{obsd:TMS}}$  versus  $-\Delta\sigma^t(\text{C}: \text{S})_{\text{calcd:TMS}}$  for 40 species (54 plots) of the Table S1, calculated with the GIAO-DFT method under B3LYP/BSS-A.

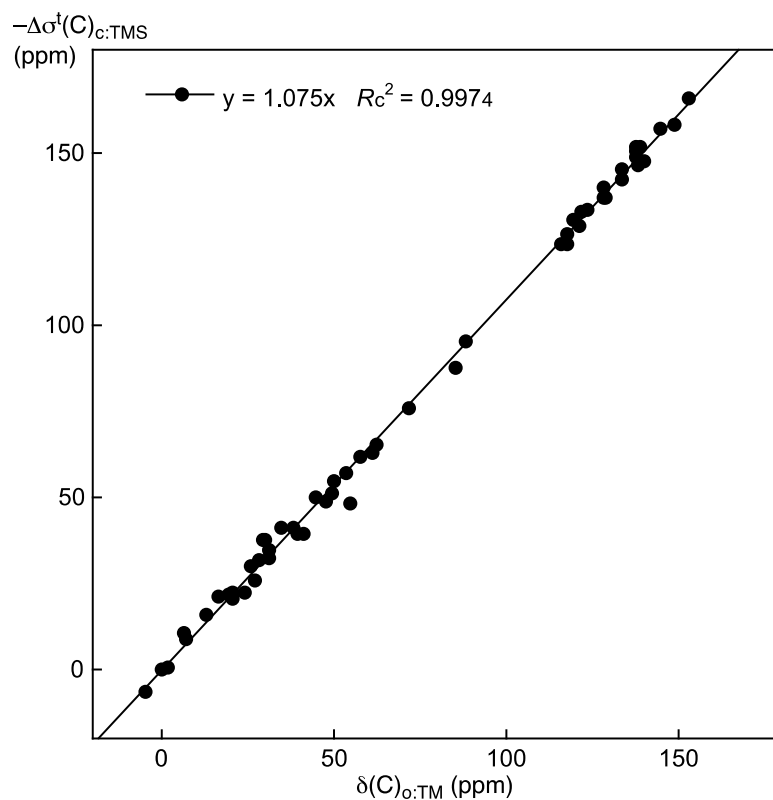

**Fig. S2** Plot of  $\delta(\text{C}: \text{S})_{\text{obsd:TMS}}$  versus  $-\Delta\sigma^t(\text{C}: \text{S})_{\text{calcd:TMS}}$  for 40 species (54 plots) of the Table S2, calculated with the GIAO-DFT method under CAM-B3LYP/BSS-A.

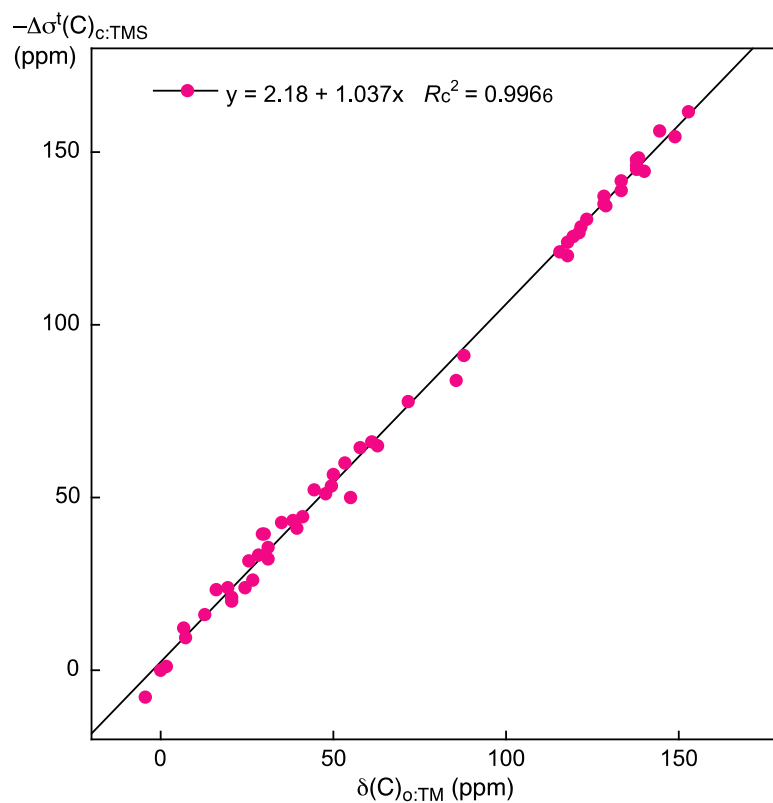

**Fig. S3** Plot of  $\delta(\text{C}: \text{S})_{\text{obsd:TMS}}$  versus  $-\Delta\sigma^t(\text{C}: \text{S})_{\text{calcd:TMS}}$  for 40 species (54 plots) of the Table S3, calculated with the GIAO-DFT method under PBE/BSS-A.

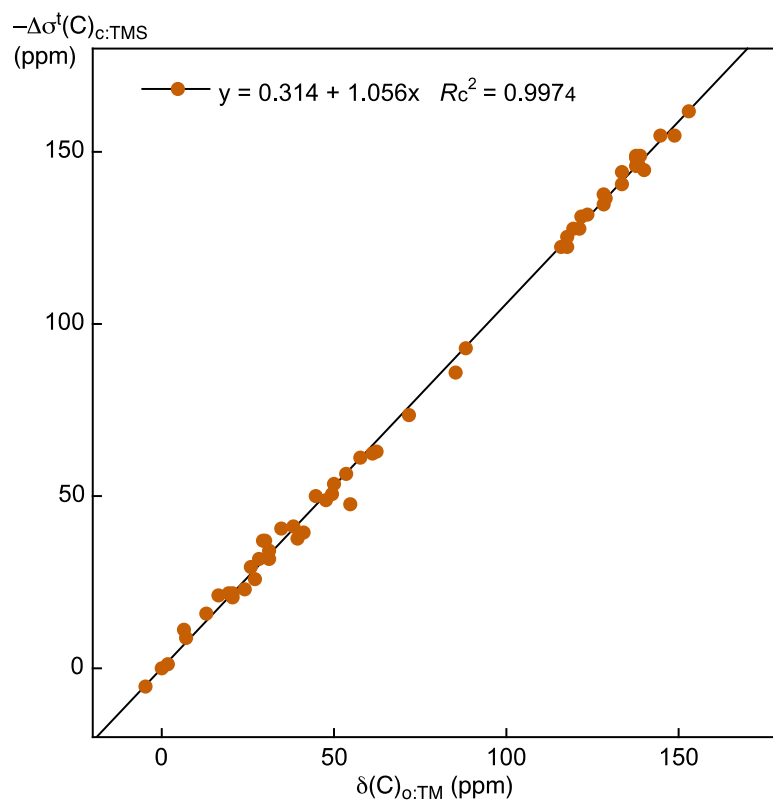

**Fig. S4** Plot of  $\delta(\text{C}: \text{S})_{\text{obsd:TMS}}$  versus  $-\Delta\sigma^t(\text{C}: \text{S})_{\text{calcd:TMS}}$  for 40 species (54 plots) of the Table S4, calculated with the GIAO-DFT method under PBE0/BSS-A

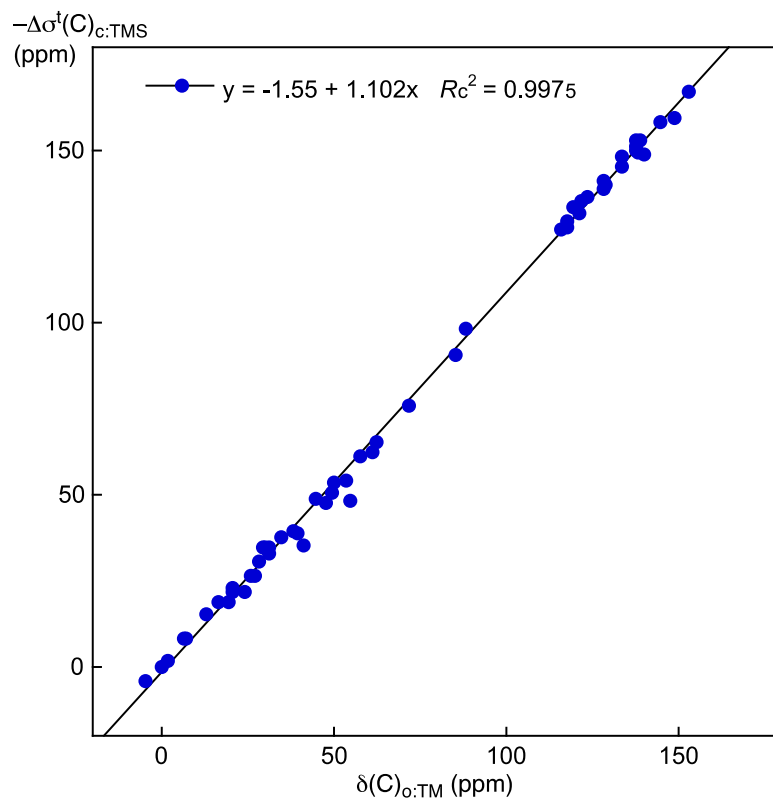

**Fig. S5** Plot of  $\delta(\text{C}: \text{S})_{\text{obsd:TMS}}$  versus  $-\Delta\sigma^t(\text{C}: \text{S})_{\text{calcd:TMS}}$  for 40 species (54 plots) of the Table S5, calculated with the GIAO-DFT method under LC- $\omega$ PBE/BSS-A.

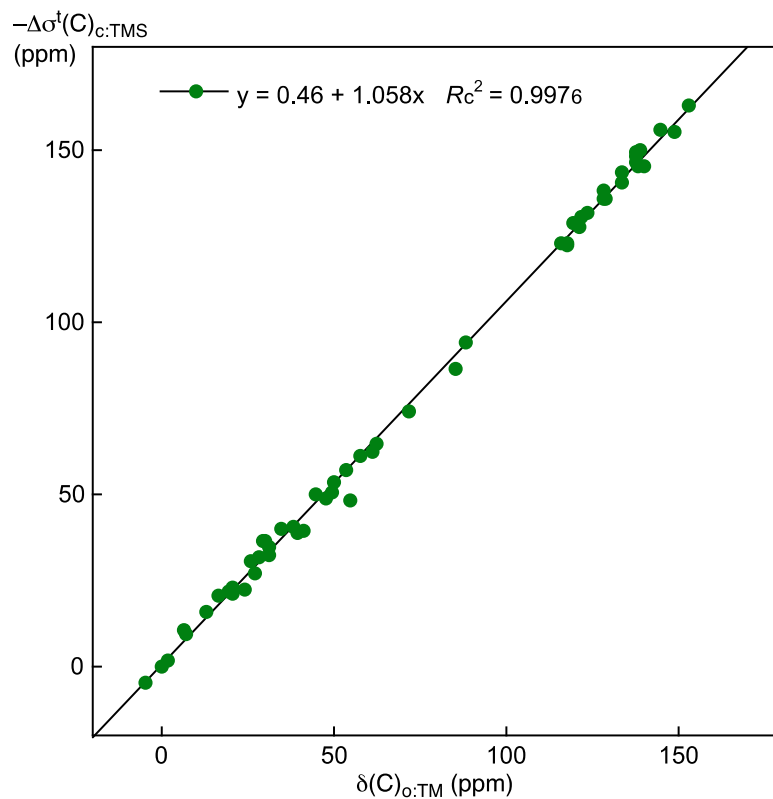

**Fig. S6** Plot of  $\delta(\text{C}: \text{S})_{\text{obsd:TMS}}$  versus  $-\Delta\sigma^t(\text{C}: \text{S})_{\text{calcd:TMS}}$  for 40 species (54 plots) of the Table S6, calculated with the GIAO-DFT method under  $\omega$ B97X-D/BSS-A.

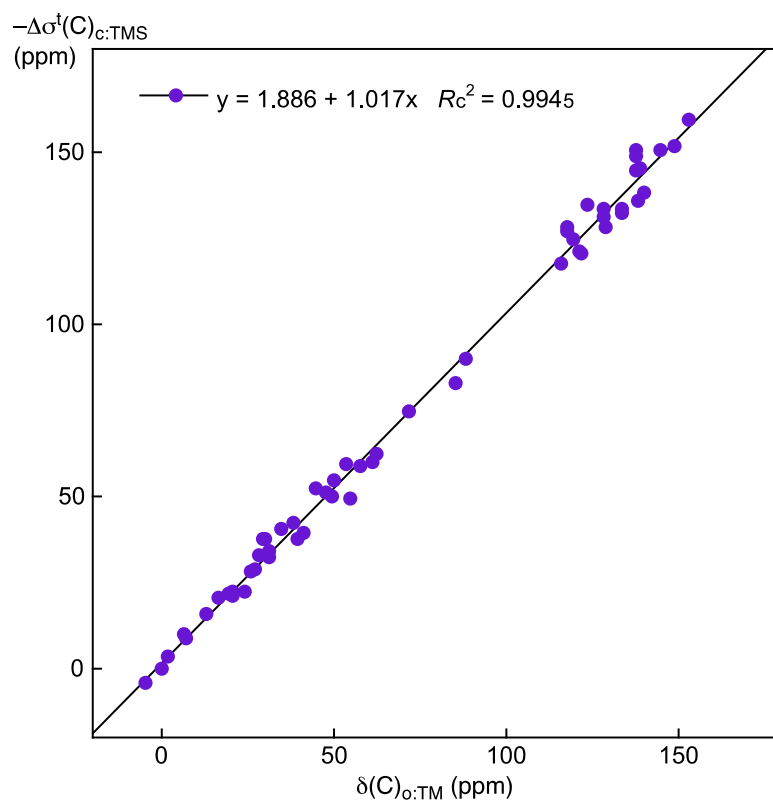

**Fig. S7** Plot of  $\delta(\text{C: S})_{\text{obsd:TMS}}$  versus  $-\Delta\sigma^t(\text{C: S})_{\text{calcd:TMS}}$  for 40 species (54 plots) of the Table S7, calculated with the GIAO-DFT method under MP2/BSS-A.

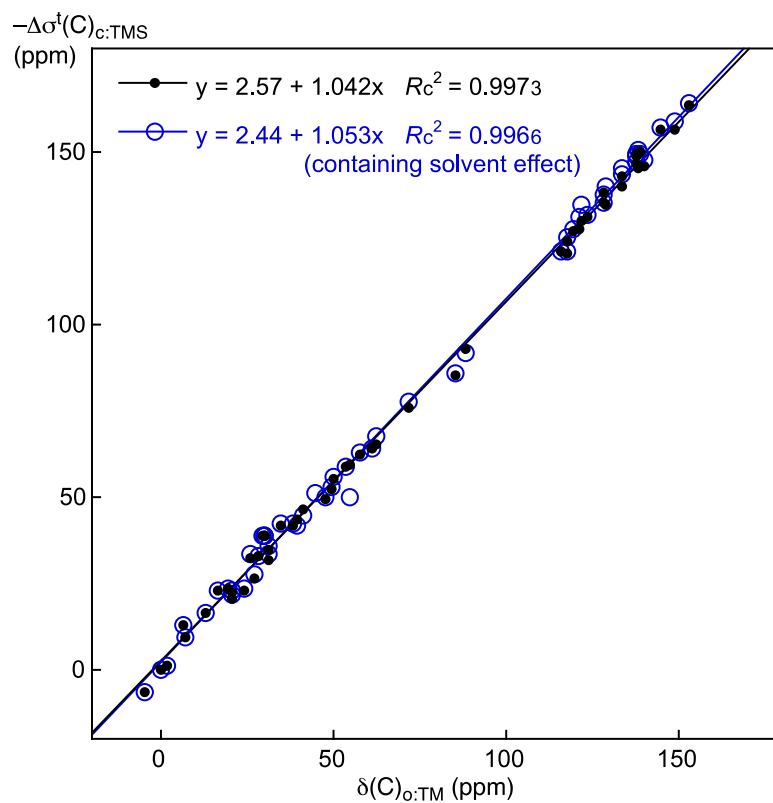

**Fig. S8** Plots of  $\delta(\text{C: S})_{\text{obsd:TMS}}$  versus  $-\Delta\sigma^t(\text{C: S})_{\text{calcd:TMS}}$  for 40 species (54 plots) of the Table S8, calculated with the GIAO-DFT method of B3LYP/BSS-A containing the solvent effect of  $\text{CHCl}_3$ .

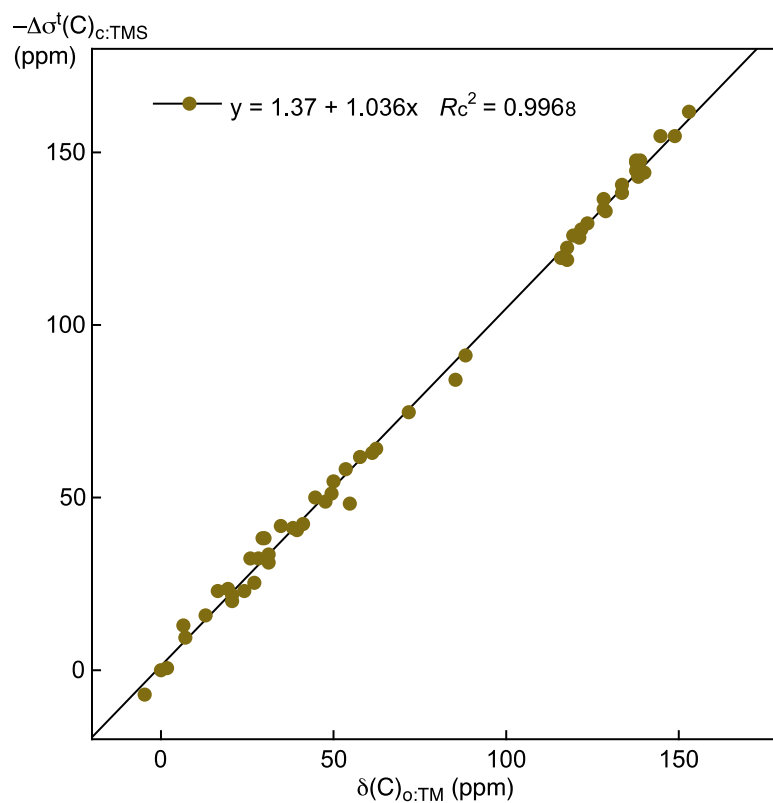

**Fig. S9** Plot of  $\delta(\text{C}: \text{S})_{\text{obsd:TMS}}$  versus  $-\Delta\sigma^t(\text{C}: \text{S})_{\text{calcd:TMS}}$  for 40 species (54 plots) of the Table S9, calculated with the GIAO-DFT method under B3LYP/def2TZVP.

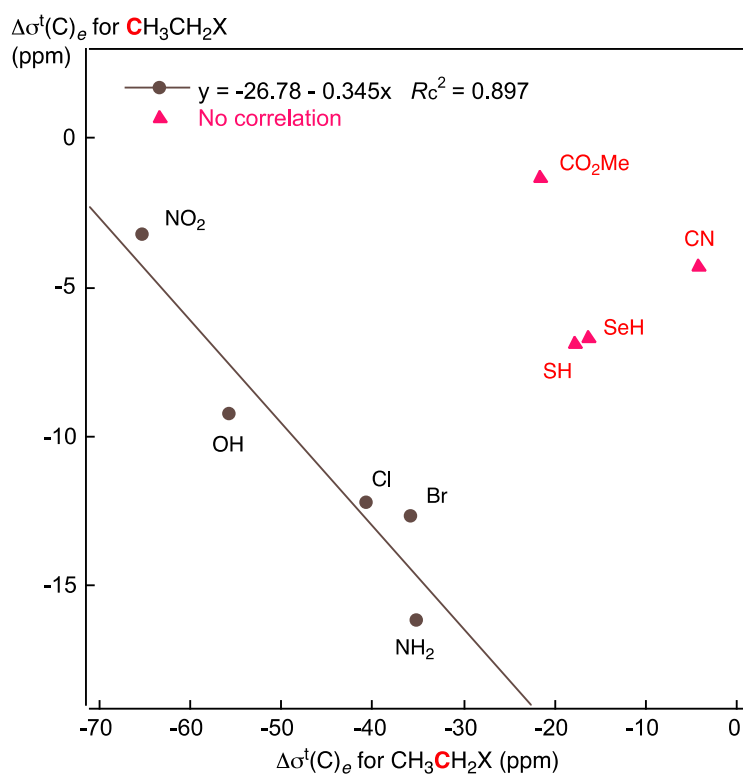

**Fig. S10** Plot of  $\Delta\sigma^t(\text{C})_e$  for  $\text{CH}_3\text{CH}_2\text{X}$  versus those of  $\text{CH}_3\text{CH}_2\text{X}$ , where X are shown in the figure. (Data for X = F are omitted.)



### Origin of the $\alpha$ -X effect

The  $\alpha$ -X effect is examined for  $\text{CH}_3\text{-X}$  from  $\text{CH}_4$  and  $\text{CH}_3\text{CH}_2\text{-X}$  from  $\text{CH}_3\text{CH}_3$  ( $\text{X} = \text{OH}$ ,  $\text{SH}$ ,  $\text{SeH}$ ,  $\text{SSCH}_3$ ,  $\text{F}$ ,  $\text{Cl}$ ,  $\text{Br}$ ,  $\text{I}$ ,  $\text{CO}_2\text{Me}$ ,  $\text{CN}$ ,  $\text{NH}_2$  and/or  $\text{NO}_2$ ) (see Scheme 3, Table 2 and Table S1 of the ESI†). The  $(\Delta\sigma^{\text{d}}(\text{C})_{\text{e}}, \Delta\sigma^{\text{p}}(\text{C})_{\text{e}}, \Delta\sigma^{\text{t}}(\text{C})_{\text{e}})$  values of  $(-18.7 \sim 40.3, -76.4 \sim -11.1, -82.3 \sim -4.4 \text{ ppm})$  are calculated for the species.

Table S13 lists the  $\sigma^{\text{d}}(\text{C})$ ,  $\sigma^{\text{p}}(\text{C})$  and  $\sigma^{\text{t}}(\text{C})$  values for  $\text{CH}_3\text{NH}_2$  and  $\text{CH}_3\text{NO}_2$  separately for each MO. In the case of  $\text{CH}_3\text{NH}_2$ , which has a very strong electron donating X of  $\text{NH}_2$ , the outer Mos of the HOMO-1 ( $\psi_8$ ) ~ HOMO-3 ( $\psi_6$ ) contribute greatly to  $\sigma^{\text{p}}(\text{C})$ . In the case of  $\text{CH}_3\text{NO}_2$ , with the very strong electron accepting group X of  $\text{NO}_2$ , the somewhat more inner HOMO-3 ( $\psi_{13}$ ) and HOMO-4 ( $\psi_{12}$ ) also strongly affect  $\sigma^{\text{p}}(\text{C})$ . Table S14 lists the  $\psi_i \rightarrow \psi_a$  transitions contributing to  $\sigma^{\text{p}}_{i \rightarrow a:kk}(\text{C}; k = x, y \text{ and/or } z)$ , which are greater than approximately 20 ppm in magnitude. The contributions to  $\text{CH}_3\text{NH}_2$  are large for the  $\psi_i \rightarrow \psi_a$  transitions of  $\psi_7 \rightarrow \psi_{26}$  ( $\sigma^{\text{p}}_{7 \rightarrow 26:zz}(\text{C}) = -19.9 \text{ ppm}$ ),  $\psi_7 \rightarrow \psi_{41}$  ( $\sigma^{\text{p}}_{7 \rightarrow 41:zz}(\text{C}) = -18.8 \text{ ppm}$ ),  $\psi_8 \rightarrow \psi_{23}$  ( $\sigma^{\text{p}}_{8 \rightarrow 23:yy}(\text{C}) = -31.4 \text{ ppm}$ ) and  $\psi_8 \rightarrow \psi_{26}$  ( $\sigma^{\text{p}}_{8 \rightarrow 26:xx}(\text{C}) = -22.9 \text{ ppm}$ ). The contributions from the  $\psi_i \rightarrow \psi_a$  transitions in  $\text{CH}_3\text{NO}_2$  are large for  $\psi_{12} \rightarrow \psi_{28}$  ( $\sigma^{\text{p}}_{12 \rightarrow 28:xx}(\text{C}) = -28.7 \text{ ppm}$ ) and  $\psi_{12} \rightarrow \psi_{29}$  ( $\sigma^{\text{p}}_{12 \rightarrow 29:yy}(\text{C}) = -29.2 \text{ ppm}$ ) and  $\psi_{13} \rightarrow \psi_{28}$  ( $\sigma^{\text{p}}_{13 \rightarrow 28:zz}(\text{C}) = -31.6 \text{ ppm}$ ).

Figs. S11a and S11b show the  $\psi_i \rightarrow \psi_a$  transitions of  $\psi_7 \rightarrow \psi_{26}$ ,  $\psi_7 \rightarrow \psi_{41}$ ,  $\psi_8 \rightarrow \psi_{23}$  and  $\psi_8 \rightarrow \psi_{26}$  for  $\text{CH}_3\text{NH}_2$  and those of  $\psi_{12} \rightarrow \psi_{28}$ ,  $\psi_{12} \rightarrow \psi_{29}$ ,  $\psi_{13} \rightarrow \psi_{28}$  and  $\psi_{13} \rightarrow \psi_{30}$  for  $\text{CH}_3\text{NO}_2$ , respectively. The  $\alpha$ -X effect is well visualized both for X of a very good donor and a very good acceptor, employing  $\psi_i \rightarrow \psi_a$  transitions.

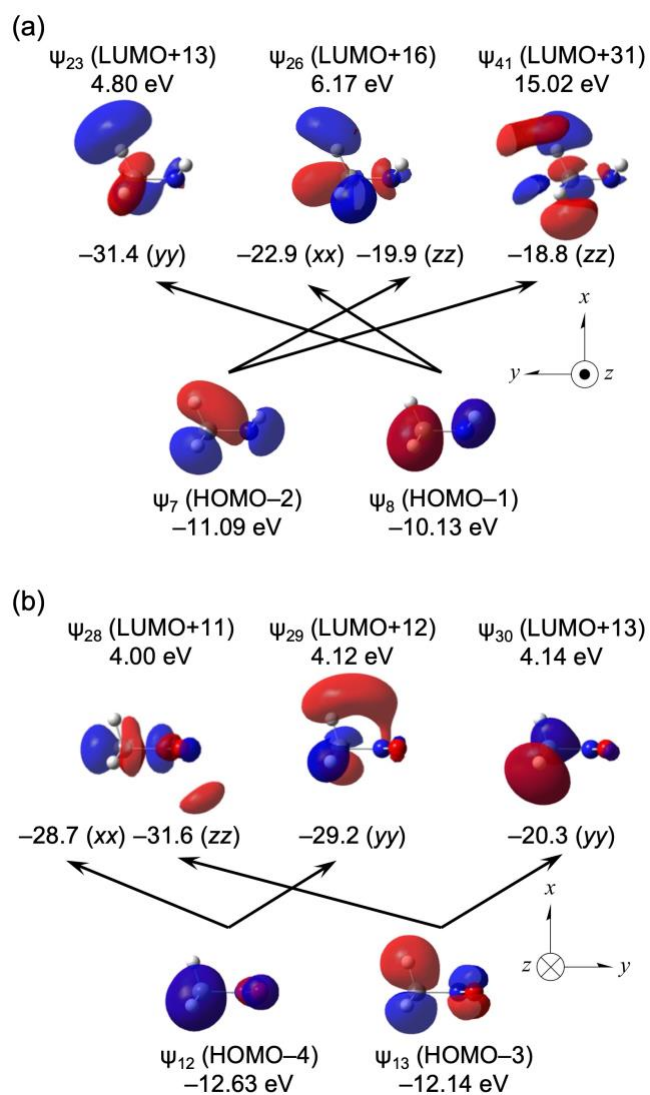

**Fig. S11** Contributions from each  $\psi_i \rightarrow \psi_a$  transition to the components of  $\sigma^P(C)$  in  $\text{CH}_3\text{NH}_2$  ( $C_s$ ) (a) and  $\text{CH}_3\text{NO}_2$  ( $C_s$ ) (b), together with the axes with an isovalue of 0.04 au.

Table S15 lists the  $\sigma^d(\text{C})$ ,  $\sigma^p(\text{C})$  and  $\sigma^t(\text{C})$  values of  $\text{C}_6\text{H}_5\text{OH}$ , separately for each MO. The outer MOs of HOMO-3 ( $\psi_{22}$ ), HOMO-8 ( $\psi_{17}$ ) and HOMO-9 ( $\psi_{16}$ ) contribute greatly to  $\sigma^p(\text{C})$ . Table S16 lists the  $\psi_i \rightarrow \psi_a$  transitions contributing to  $\sigma^p_{i \rightarrow a:kk}(\text{C})$  ( $k = x, y$  and/or  $z$ ), which are greater than 18 ppm. The  $\psi_i \rightarrow \psi_a$  transitions of  $\psi_{16} \rightarrow \psi_{28}$  ( $\sigma^p_{16 \rightarrow 28:yy}(\text{C}) = -53.5$  ppm),  $\psi_{17} \rightarrow \psi_{28}$  ( $\sigma^p_{17 \rightarrow 28:xx}(\text{C}) = -25.5$  ppm),  $\psi_{17} \rightarrow \psi_{87}$  ( $\sigma^p_{17 \rightarrow 87:xx}(\text{C}) = -24.9$  ppm) and  $\psi_{22} \rightarrow \psi_{44}$  ( $\sigma^p_{22 \rightarrow 44:yy}(\text{C}) = -28.1$  ppm) contribute a lot to  $\sigma^p_{i \rightarrow a:kk}(\text{C})$  ( $k = x, y$  and/or  $z$ ).

Fig. S12 shows the  $\psi_i \rightarrow \psi_a$  transitions of  $\psi_{16} \rightarrow \psi_{28}$ ,  $\psi_{17} \rightarrow \psi_{28}$ ,  $\psi_{17} \rightarrow \psi_{87}$  and  $\psi_{22} \rightarrow \psi_{44}$ , where the transitions of large contributions are omitted if the contributions from  $\psi_i$  are small in  $\text{C}_6\text{H}_5\text{OH}$ . The  $i$ -X effect is well visualized through the occupied-to-unoccupied orbital transitions.

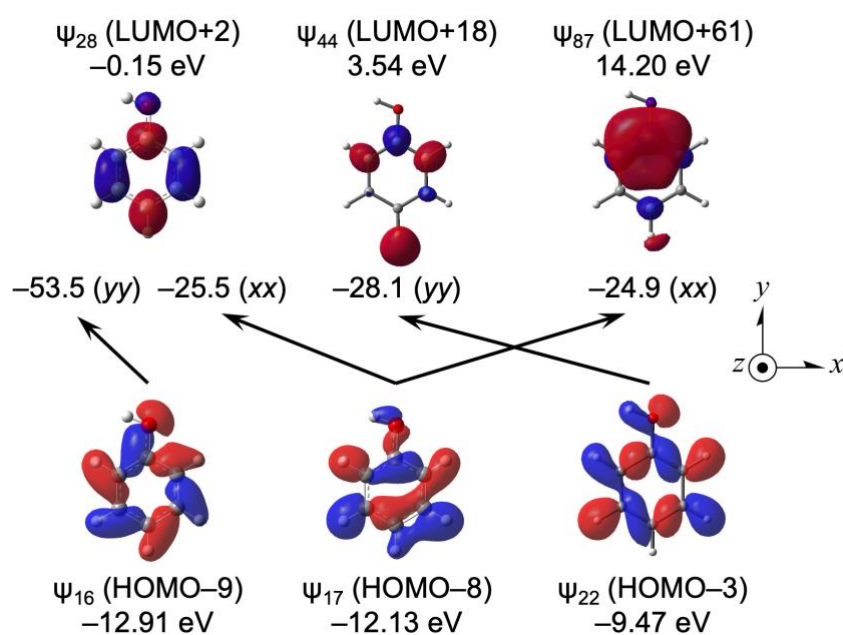

**Fig. S12** Contributions from each  $\psi_i \rightarrow \psi_a$  transition to the components of  $\sigma^p(\text{C})$  in  $\text{C}_6\text{H}_5\text{OH}$  ( $C_s$ ), together with their axes, with an isovalue of 0.04 au.

## Optimized structures given by Cartesian coordinates

Optimized structures given by Cartesian coordinates for examined molecules, together with the total energies with the B3LYP/BSS-A method of the Gaussian 09 program.

|                      |                                            |           |           |           |
|----------------------|--------------------------------------------|-----------|-----------|-----------|
| Compound             | <b>1:</b> C <sup>4-</sup>                  |           |           |           |
| Symmetry             | O <sub>h</sub>                             |           |           |           |
| energy               | E = -36.7801429 a.u.                       |           |           |           |
| Standard orientation |                                            |           |           |           |
| 6                    | 0                                          | 0.000000  | 0.000000  | 0.000000  |
| Compound             | <b>2:</b> HC <sup>3-</sup>                 |           |           |           |
| Symmetry             | C <sub>∞v</sub>                            |           |           |           |
| energy               | E = -38.0130639 a.u.                       |           |           |           |
| Standard orientation |                                            |           |           |           |
| 6                    | 0                                          | 0.000000  | 0.000000  | 0.156326  |
| 1                    | 0                                          | 0.000000  | 0.000000  | -0.937956 |
| Compound             | <b>3:</b> H <sub>2</sub> C <sup>2-</sup>   |           |           |           |
| Symmetry             | C <sub>2v</sub>                            |           |           |           |
| energy               | E = -38.9775351 a.u.                       |           |           |           |
| Standard orientation |                                            |           |           |           |
| 6                    | 0                                          | 0.000000  | 0.000000  | 0.167545  |
| 1                    | 0                                          | 0.000000  | 0.896970  | -0.502636 |
| 1                    | 0                                          | 0.000000  | -0.896970 | -0.502636 |
| Compound             | <b>4:</b> H <sub>3</sub> C <sup>-</sup>    |           |           |           |
| Symmetry             | C <sub>3v</sub>                            |           |           |           |
| energy               | E = -39.8601650 a.u.                       |           |           |           |
| Standard orientation |                                            |           |           |           |
| 6                    | 0                                          | 0.000000  | 0.000000  | 0.125904  |
| 1                    | 0                                          | 0.000000  | 1.034205  | -0.251808 |
| 1                    | 0                                          | -0.895648 | -0.517103 | -0.251808 |
| 1                    | 0                                          | 0.895648  | -0.517103 | -0.251808 |
| Compound             | <b>5:</b> H <sub>4</sub> C                 |           |           |           |
| Symmetry             | T <sub>d</sub>                             |           |           |           |
| energy               | E = -40.5373993 a.u.                       |           |           |           |
| Standard orientation |                                            |           |           |           |
| 6                    | 0                                          | 0.000000  | 0.000000  | 0.000000  |
| 1                    | 0                                          | 0.628183  | 0.628183  | 0.628183  |
| 1                    | 0                                          | -0.628183 | -0.628183 | 0.628183  |
| 1                    | 0                                          | -0.628183 | 0.628183  | -0.628183 |
| 1                    | 0                                          | 0.628183  | -0.628183 | -0.628183 |
| Compound             | <b>6:</b> CH <sub>3</sub> C-H <sub>2</sub> |           |           |           |
| Symmetry             | C <sub>s</sub>                             |           |           |           |
| energy               | E = -79.1810665 a.u.                       |           |           |           |
| Standard orientation |                                            |           |           |           |
| 6                    | 0                                          | -0.057382 | 0.839127  | 0.000000  |
| 1                    | 0                                          | 0.464931  | 1.234220  | 0.884887  |
| 1                    | 0                                          | 0.464931  | 1.234220  | -0.884887 |
| 6                    | 0                                          | -0.057382 | -0.686321 | 0.000000  |
| 1                    | 0                                          | -0.589406 | -1.084501 | 0.872860  |

|   |   |           |           |           |
|---|---|-----------|-----------|-----------|
| 1 | 0 | 0.937537  | -1.216275 | 0.000000  |
| 1 | 0 | -0.589406 | -1.084501 | -0.872860 |

Compound **7**: CH<sub>3</sub>CH<sub>2</sub>C<sup>-</sup>H<sub>2</sub>  
Symmetry C<sub>s</sub>  
energy  $E = -118.5172821$  a.u.  
Standard orientation

|   |   |           |           |           |
|---|---|-----------|-----------|-----------|
| 6 | 0 | 1.399387  | 0.032490  | 0.000000  |
| 1 | 0 | 1.684595  | -0.508657 | 0.907410  |
| 1 | 0 | 1.684595  | -0.508657 | -0.907410 |
| 6 | 0 | 0.000000  | 0.561733  | 0.000000  |
| 1 | 0 | -0.161604 | 1.210278  | 0.876171  |
| 1 | 0 | -0.161604 | 1.210278  | -0.876171 |
| 6 | 0 | -1.174732 | -0.464023 | 0.000000  |
| 1 | 0 | -1.115800 | -1.109846 | 0.880568  |
| 1 | 0 | -1.115800 | -1.109846 | -0.880568 |
| 1 | 0 | -2.162309 | 0.035245  | 0.000000  |

Compound **8**: (CH<sub>3</sub>)<sub>2</sub>CHC<sup>-</sup>H<sub>2</sub>  
Symmetry C<sub>1</sub>  
energy  $E = -157.8480286$  a.u.  
Standard orientation

|   |   |           |           |           |
|---|---|-----------|-----------|-----------|
| 6 | 0 | -0.645654 | 0.747959  | -0.239830 |
| 1 | 0 | -0.543113 | 0.882597  | -1.312328 |
| 1 | 0 | -1.172969 | 1.563073  | 0.248472  |
| 6 | 0 | 0.529049  | 0.318316  | 0.433129  |
| 1 | 0 | 0.545859  | 0.424163  | 1.516965  |
| 6 | 0 | -1.512463 | -0.595847 | 0.027373  |
| 1 | 0 | -1.086021 | -1.455442 | -0.479282 |
| 1 | 0 | -1.650074 | -0.797593 | 1.085885  |
| 1 | 0 | -2.475959 | -0.347752 | -0.416030 |
| 6 | 0 | 1.677203  | -0.308679 | -0.179158 |
| 1 | 0 | 2.478375  | 0.448376  | -0.054683 |
| 1 | 0 | 1.569485  | -0.527819 | -1.237330 |
| 1 | 0 | 2.045611  | -1.160098 | 0.399250  |

Compound **9**: (CH<sub>3</sub>)<sub>3</sub>CC<sup>-</sup>H<sub>2</sub>  
Symmetry C<sub>s</sub>  
energy  $E = -197.1755240$  a.u.  
Standard orientation

|   |   |           |           |           |
|---|---|-----------|-----------|-----------|
| 6 | 0 | -0.852911 | -0.111921 | 0.732602  |
| 1 | 0 | -1.064772 | 0.713692  | 1.411046  |
| 1 | 0 | -1.011118 | -1.071652 | 1.220104  |
| 6 | 0 | 0.473257  | 0.000616  | 0.149778  |
| 6 | 0 | -1.855058 | 0.001601  | -0.485944 |
| 1 | 0 | -1.763419 | 0.959101  | -0.991756 |
| 1 | 0 | -2.853054 | -0.079492 | -0.061180 |
| 1 | 0 | -1.708433 | -0.806016 | -1.198506 |
| 6 | 0 | 1.060857  | 1.314857  | -0.102031 |
| 1 | 0 | 1.915970  | 1.401209  | 0.588948  |
| 1 | 0 | 1.511995  | 1.369067  | -1.095735 |
| 1 | 0 | 0.386106  | 2.145125  | 0.081484  |
| 6 | 0 | 1.224772  | -1.207742 | -0.185782 |
| 1 | 0 | 1.683855  | -1.527043 | 0.766457  |
| 1 | 0 | 2.025053  | -1.053805 | -0.904031 |
| 1 | 0 | 0.572319  | -2.034653 | -0.468575 |

Compound **10**: CH<sub>3</sub>(CH<sub>2</sub>)<sub>2</sub>C<sup>-</sup>H<sub>2</sub>  
Symmetry C<sub>s</sub>  
energy  $E = -157.8425845$  a.u.  
Standard orientation

|   |   |           |           |           |
|---|---|-----------|-----------|-----------|
| 6 | 0 | 1.507664  | -1.435026 | 0.000000  |
| 1 | 0 | 2.089417  | -1.208068 | 0.902410  |
| 1 | 0 | 2.089417  | -1.208068 | -0.902410 |
| 6 | 0 | 0.138578  | -0.809536 | 0.000000  |
| 1 | 0 | -0.433547 | -1.160051 | -0.875891 |
| 1 | 0 | -0.433547 | -1.160051 | 0.875891  |
| 6 | 0 | 0.000000  | 0.744578  | 0.000000  |
| 1 | 0 | 0.528914  | 1.137382  | -0.874414 |
| 1 | 0 | 0.528914  | 1.137382  | 0.874414  |
| 6 | 0 | -1.455368 | 1.234687  | 0.000000  |
| 1 | 0 | -1.989385 | 0.863676  | 0.880373  |
| 1 | 0 | -1.989385 | 0.863676  | -0.880373 |
| 1 | 0 | -1.536040 | 2.325907  | 0.000000  |

Compound **11**: CH<sub>3</sub>(CH<sub>2</sub>)<sub>3</sub>C<sup>-</sup>H<sub>2</sub>  
Symmetry C<sub>s</sub>  
energy  $E = -197.1707841$  a.u.  
Standard orientation

|   |   |           |           |           |
|---|---|-----------|-----------|-----------|
| 6 | 0 | 2.632325  | 0.653726  | 0.000000  |
| 1 | 0 | 2.726921  | 1.264881  | 0.904306  |
| 1 | 0 | 2.726921  | 1.264881  | -0.904306 |
| 6 | 0 | 1.440253  | -0.258483 | 0.000000  |
| 1 | 0 | 1.478752  | -0.925982 | -0.876478 |
| 1 | 0 | 1.478752  | -0.925982 | 0.876478  |
| 6 | 0 | 0.000000  | 0.357618  | 0.000000  |
| 1 | 0 | -0.093093 | 1.009067  | -0.875585 |
| 1 | 0 | -0.093093 | 1.009067  | 0.875585  |
| 6 | 0 | -1.120783 | -0.683156 | 0.000000  |
| 1 | 0 | -1.003232 | -1.334714 | 0.873656  |
| 1 | 0 | -1.003232 | -1.334714 | -0.873656 |
| 6 | 0 | -2.536313 | -0.101305 | 0.000000  |
| 1 | 0 | -2.704396 | 0.524893  | -0.879251 |
| 1 | 0 | -2.704396 | 0.524893  | 0.879251  |
| 1 | 0 | -3.302793 | -0.886687 | 0.000000  |

Compound **12**: CH<sub>3</sub>CH<sub>3</sub>  
Symmetry D<sub>3d</sub>  
energy  $E = -79.8627762$  a.u.  
Standard orientation

|   |   |           |           |           |
|---|---|-----------|-----------|-----------|
| 6 | 0 | 0.000000  | 0.000000  | 0.763656  |
| 1 | 0 | 0.000000  | 1.016030  | 1.160566  |
| 1 | 0 | 0.879908  | -0.508015 | 1.160566  |
| 1 | 0 | -0.879908 | -0.508015 | 1.160566  |
| 6 | 0 | 0.000000  | 0.000000  | -0.763656 |
| 1 | 0 | 0.879908  | 0.508015  | -1.160566 |
| 1 | 0 | 0.000000  | -1.016030 | -1.160566 |
| 1 | 0 | -0.879908 | 0.508015  | -1.160566 |

Compound **13**: CH<sub>3</sub>CH<sub>2</sub>CH<sub>3</sub>  
Symmetry C<sub>2v</sub>  
energy  $E = -119.1901946$  a.u.  
Standard orientation

|   |   |           |           |           |
|---|---|-----------|-----------|-----------|
| 6 | 0 | 0.000000  | 0.000000  | 0.584828  |
| 1 | 0 | -0.873548 | 0.000000  | 1.241908  |
| 1 | 0 | 0.873548  | 0.000000  | 1.241908  |
| 6 | 0 | 0.000000  | 1.273856  | -0.259186 |
| 1 | 0 | -0.880647 | 1.318111  | -0.903259 |
| 1 | 0 | 0.880647  | 1.318111  | -0.903259 |
| 1 | 0 | 0.000000  | 2.168223  | 0.365244  |
| 6 | 0 | 0.000000  | -1.273856 | -0.259186 |
| 1 | 0 | -0.880647 | -1.318111 | -0.903259 |
| 1 | 0 | 0.880647  | -1.318111 | -0.903259 |
| 1 | 0 | 0.000000  | -2.168223 | 0.365244  |

Compound **14:** (CH<sub>3</sub>)<sub>3</sub>CH  
Symmetry C<sub>3v</sub>  
energy E = -158.5183940 a.u.  
Standard orientation

|   |   |           |           |           |
|---|---|-----------|-----------|-----------|
| 6 | 0 | 0.000000  | 0.000000  | 0.371430  |
| 1 | 0 | 0.000000  | 0.000000  | 1.466621  |
| 6 | 0 | 0.000000  | 1.458049  | -0.095548 |
| 1 | 0 | 0.000000  | 1.515410  | -1.186954 |
| 1 | 0 | -0.882013 | 1.990442  | 0.264256  |
| 1 | 0 | 0.882013  | 1.990442  | 0.264256  |
| 6 | 0 | -1.262708 | -0.729025 | -0.095548 |
| 1 | 0 | -1.312384 | -0.757705 | -1.186954 |
| 1 | 0 | -2.164780 | -0.231375 | 0.264256  |
| 1 | 0 | -1.282767 | -1.759067 | 0.264256  |
| 6 | 0 | 1.262708  | -0.729025 | -0.095548 |
| 1 | 0 | 1.282767  | -1.759067 | 0.264256  |
| 1 | 0 | 2.164780  | -0.231375 | 0.264256  |
| 1 | 0 | 1.312384  | -0.757705 | -1.186954 |

Compound **15:** (CH<sub>3</sub>)<sub>4</sub>C  
Symmetry T<sub>d</sub>  
energy E = -197.8461248 a.u.  
Standard orientation

|   |   |           |           |           |
|---|---|-----------|-----------|-----------|
| 6 | 0 | 0.000000  | 0.000000  | 0.000000  |
| 6 | 0 | 0.886869  | 0.886869  | 0.886869  |
| 1 | 0 | 0.282226  | 1.529632  | 1.529632  |
| 1 | 0 | 1.529632  | 1.529632  | 0.282226  |
| 1 | 0 | 1.529632  | 0.282226  | 1.529632  |
| 6 | 0 | -0.886869 | -0.886869 | 0.886869  |
| 1 | 0 | -0.282226 | -1.529632 | 1.529632  |
| 1 | 0 | -1.529632 | -1.529632 | 0.282226  |
| 1 | 0 | -1.529632 | -0.282226 | 1.529632  |
| 6 | 0 | -0.886869 | 0.886869  | -0.886869 |
| 1 | 0 | -0.282226 | 1.529632  | -1.529632 |
| 1 | 0 | -1.529632 | 1.529632  | -0.282226 |
| 1 | 0 | -1.529632 | 0.282226  | -1.529632 |
| 6 | 0 | 0.886869  | -0.886869 | -0.886869 |
| 1 | 0 | 0.282226  | -1.529632 | -1.529632 |
| 1 | 0 | 1.529632  | -1.529632 | -0.282226 |
| 1 | 0 | 1.529632  | -0.282226 | -1.529632 |

Compound **16:** CH<sub>3</sub>CH<sub>2</sub>CH<sub>2</sub>CH<sub>3</sub>  
Symmetry C<sub>2h</sub>  
energy E = -158.5174535 a.u.  
Standard orientation

|   |   |           |           |           |
|---|---|-----------|-----------|-----------|
| 6 | 0 | -0.420075 | 0.639038  | 0.000000  |
| 1 | 0 | -1.078107 | 0.634985  | 0.874164  |
| 1 | 0 | -1.078107 | 0.634985  | -0.874164 |
| 6 | 0 | 0.420075  | 1.915190  | 0.000000  |
| 1 | 0 | 1.063658  | 1.962778  | 0.880689  |
| 1 | 0 | 1.063658  | 1.962778  | -0.880689 |
| 1 | 0 | -0.207795 | 2.807054  | 0.000000  |
| 6 | 0 | 0.420075  | -0.639038 | 0.000000  |
| 1 | 0 | 1.078107  | -0.634985 | 0.874164  |
| 1 | 0 | 1.078107  | -0.634985 | -0.874164 |
| 6 | 0 | -0.420075 | -1.915190 | 0.000000  |
| 1 | 0 | -1.063658 | -1.962778 | 0.880689  |
| 1 | 0 | -1.063658 | -1.962778 | -0.880689 |
| 1 | 0 | 0.207795  | -2.807054 | 0.000000  |

Compound **17**: CH<sub>3</sub>(CH<sub>2</sub>)<sub>3</sub>CH<sub>3</sub>  
Symmetry C<sub>2v</sub>  
energy  $E = -197.8446211$  a.u.  
Standard orientation

|   |   |           |           |           |
|---|---|-----------|-----------|-----------|
| 6 | 0 | 0.000000  | 0.000000  | 0.314051  |
| 1 | 0 | 0.874767  | 0.000000  | 0.973066  |
| 1 | 0 | -0.874767 | 0.000000  | 0.973066  |
| 6 | 0 | 0.000000  | 1.280664  | -0.521747 |
| 1 | 0 | 0.874141  | 1.280205  | -1.179593 |
| 1 | 0 | -0.874141 | 1.280205  | -1.179593 |
| 6 | 0 | 0.000000  | 2.553732  | 0.323488  |
| 1 | 0 | 0.880636  | 2.598890  | 0.967283  |
| 1 | 0 | -0.880636 | 2.598890  | 0.967283  |
| 1 | 0 | 0.000000  | 3.447961  | -0.301044 |
| 6 | 0 | 0.000000  | -1.280664 | -0.521747 |
| 1 | 0 | 0.874141  | -1.280205 | -1.179593 |
| 1 | 0 | -0.874141 | -1.280205 | -1.179593 |
| 6 | 0 | 0.000000  | -2.553732 | 0.323488  |
| 1 | 0 | 0.880636  | -2.598890 | 0.967283  |
| 1 | 0 | -0.880636 | -2.598890 | 0.967283  |
| 1 | 0 | 0.000000  | -3.447961 | -0.301044 |

Compound **18**: (CH<sub>3</sub>)<sub>2</sub>CHCH<sub>2</sub>CH<sub>3</sub>  
Symmetry C<sub>1</sub>  
energy  $E = -197.8440349$  a.u.  
Standard orientation

|   |   |           |           |           |
|---|---|-----------|-----------|-----------|
| 6 | 0 | 0.480203  | -0.002963 | -0.327738 |
| 6 | 0 | 0.664189  | 1.450098  | 0.121208  |
| 1 | 0 | 1.555482  | 1.887583  | -0.331413 |
| 1 | 0 | -0.184071 | 2.076500  | -0.154180 |
| 1 | 0 | 0.782805  | 1.506691  | 1.206422  |
| 6 | 0 | 1.734302  | -0.823998 | -0.013200 |
| 1 | 0 | 1.915030  | -0.859177 | 1.064125  |
| 1 | 0 | 1.636356  | -1.851736 | -0.366771 |
| 1 | 0 | 2.619518  | -0.391558 | -0.482369 |
| 1 | 0 | 0.343244  | -0.004042 | -1.415429 |
| 6 | 0 | -0.763812 | -0.657067 | 0.294454  |
| 1 | 0 | -0.667202 | -0.630343 | 1.385068  |
| 1 | 0 | -0.771412 | -1.715134 | 0.017916  |
| 6 | 0 | -2.097067 | -0.031970 | -0.116498 |
| 1 | 0 | -2.186523 | 1.001019  | 0.220300  |
| 1 | 0 | -2.215593 | -0.038161 | -1.202172 |
| 1 | 0 | -2.934516 | -0.586236 | 0.309143  |



Compound **19**: (CH<sub>3</sub>)<sub>3</sub>CCH<sub>2</sub>CH<sub>3</sub>  
Symmetry C<sub>s</sub>  
energy  $E = -237.1699657$  a.u.  
Standard orientation

|   |   |           |           |           |
|---|---|-----------|-----------|-----------|
| 6 | 0 | 1.169577  | 0.270459  | 0.000000  |
| 1 | 0 | 1.487243  | 0.847637  | 0.873662  |
| 1 | 0 | 1.487243  | 0.847637  | -0.873662 |
| 6 | 0 | 1.908541  | -1.068650 | 0.000000  |
| 1 | 0 | 1.672908  | -1.666295 | -0.880970 |
| 1 | 0 | 1.672908  | -1.666295 | 0.880970  |
| 1 | 0 | 2.986876  | -0.904205 | 0.000000  |
| 6 | 0 | -0.377216 | 0.217889  | 0.000000  |
| 6 | 0 | -0.899202 | -0.498742 | -1.255581 |
| 1 | 0 | -0.597420 | -1.546139 | -1.280662 |
| 1 | 0 | -1.989991 | -0.471618 | -1.288530 |
| 1 | 0 | -0.527260 | -0.020297 | -2.163996 |
| 6 | 0 | -0.899202 | -0.498742 | 1.255581  |
| 1 | 0 | -1.989991 | -0.471618 | 1.288530  |
| 1 | 0 | -0.597420 | -1.546139 | 1.280662  |
| 1 | 0 | -0.527260 | -0.020297 | 2.163996  |
| 6 | 0 | -0.899202 | 1.663902  | 0.000000  |
| 1 | 0 | -0.553525 | 2.206864  | 0.881942  |
| 1 | 0 | -0.553525 | 2.206864  | -0.881942 |
| 1 | 0 | -1.990568 | 1.687195  | 0.000000  |

Compound **20**: CH<sub>3</sub>(CH<sub>2</sub>)<sub>4</sub>CH<sub>3</sub>  
Symmetry C<sub>2h</sub>  
energy  $E = -237.1717998$  a.u.  
Standard orientation

|   |   |           |           |           |
|---|---|-----------|-----------|-----------|
| 6 | 0 | 0.005749  | 0.764488  | 0.000000  |
| 1 | 0 | -0.542528 | 1.129769  | 0.874767  |
| 1 | 0 | -0.542528 | 1.129769  | -0.874767 |
| 6 | 0 | 1.410752  | 1.368804  | 0.000000  |
| 1 | 0 | 1.958605  | 1.004624  | 0.874085  |
| 1 | 0 | 1.958605  | 1.004624  | -0.874085 |
| 6 | 0 | 1.410752  | 2.896907  | 0.000000  |
| 1 | 0 | 0.899126  | 3.290481  | 0.880585  |
| 1 | 0 | 0.899126  | 3.290481  | -0.880585 |
| 1 | 0 | 2.425514  | 3.296781  | 0.000000  |
| 6 | 0 | -0.005749 | -0.764488 | 0.000000  |
| 1 | 0 | 0.542528  | -1.129769 | 0.874767  |
| 1 | 0 | 0.542528  | -1.129769 | -0.874767 |
| 6 | 0 | -1.410752 | -1.368804 | 0.000000  |
| 1 | 0 | -1.958605 | -1.004624 | 0.874085  |
| 1 | 0 | -1.958605 | -1.004624 | -0.874085 |
| 6 | 0 | -1.410752 | -2.896907 | 0.000000  |
| 1 | 0 | -0.899126 | -3.290481 | 0.880585  |
| 1 | 0 | -0.899126 | -3.290481 | -0.880585 |
| 1 | 0 | -2.425514 | -3.296781 | 0.000000  |

Compound **21**: (CH<sub>3</sub>)<sub>2</sub>CHCH(CH<sub>3</sub>)<sub>2</sub>  
Symmetry C<sub>2h</sub>  
energy  $E = -237.1687932$  a.u.  
Standard orientation

|   |   |          |          |          |
|---|---|----------|----------|----------|
| 6 | 0 | 0.231406 | 0.739007 | 0.000000 |
| 1 | 0 | 1.328494 | 0.732030 | 0.000000 |

|   |   |           |           |           |
|---|---|-----------|-----------|-----------|
| 6 | 0 | -0.231406 | 1.496844  | 1.250973  |
| 1 | 0 | -1.321298 | 1.480548  | 1.334257  |
| 1 | 0 | 0.180049  | 1.078541  | 2.167942  |
| 1 | 0 | 0.077704  | 2.541917  | 1.201349  |
| 6 | 0 | -0.231406 | 1.496844  | -1.250973 |
| 1 | 0 | 0.077704  | 2.541917  | -1.201349 |
| 1 | 0 | 0.180049  | 1.078541  | -2.167942 |
| 1 | 0 | -1.321298 | 1.480548  | -1.334257 |
| 6 | 0 | -0.231406 | -0.739007 | 0.000000  |
| 1 | 0 | -1.328494 | -0.732030 | 0.000000  |
| 6 | 0 | 0.231406  | -1.496844 | -1.250973 |
| 1 | 0 | 1.321298  | -1.480548 | -1.334257 |
| 1 | 0 | -0.180049 | -1.078541 | -2.167942 |
| 1 | 0 | -0.077704 | -2.541917 | -1.201349 |
| 6 | 0 | 0.231406  | -1.496844 | 1.250973  |
| 1 | 0 | -0.077704 | -2.541917 | 1.201349  |
| 1 | 0 | -0.180049 | -1.078541 | 2.167942  |
| 1 | 0 | 1.321298  | -1.480548 | 1.334257  |

Compound **22**: (CH<sub>3</sub>)<sub>3</sub>CCH(CH<sub>3</sub>)<sub>2</sub>  
Symmetry C<sub>s</sub>  
energy E = -276.4927327 a.u.  
Standard orientation

|   |   |           |           |           |
|---|---|-----------|-----------|-----------|
| 6 | 0 | 0.594102  | 0.761242  | 0.000000  |
| 1 | 0 | 1.667444  | 0.538519  | 0.000000  |
| 6 | 0 | 0.312734  | 1.606711  | 1.250275  |
| 1 | 0 | -0.739922 | 1.886456  | 1.318385  |
| 1 | 0 | 0.584575  | 1.094524  | 2.171695  |
| 1 | 0 | 0.889440  | 2.532104  | 1.211275  |
| 6 | 0 | 0.312734  | 1.606711  | -1.250275 |
| 1 | 0 | 0.889440  | 2.532104  | -1.211275 |
| 1 | 0 | 0.584575  | 1.094524  | -2.171695 |
| 1 | 0 | -0.739922 | 1.886456  | -1.318385 |
| 6 | 0 | -0.117075 | -0.634080 | 0.000000  |
| 6 | 0 | 0.312734  | -1.435826 | -1.242271 |
| 1 | 0 | 1.400475  | -1.510201 | -1.306258 |
| 1 | 0 | -0.048594 | -0.987031 | -2.166715 |
| 1 | 0 | -0.086337 | -2.450492 | -1.195233 |
| 6 | 0 | 0.312734  | -1.435826 | 1.242271  |
| 1 | 0 | -0.086337 | -2.450492 | 1.195233  |
| 1 | 0 | -0.048594 | -0.987031 | 2.166715  |
| 1 | 0 | 1.400475  | -1.510201 | 1.306258  |
| 6 | 0 | -1.649604 | -0.505311 | 0.000000  |
| 1 | 0 | -2.013421 | 0.022046  | -0.882169 |
| 1 | 0 | -2.110042 | -1.495062 | 0.000000  |
| 1 | 0 | -2.013421 | 0.022046  | 0.882169  |

Compound **23**: (CH<sub>3</sub>)<sub>2</sub>CHCH<sub>2</sub>CH<sub>2</sub>CH<sub>3</sub>  
Symmetry C<sub>1</sub>  
energy E = -237.1687932 a.u.  
Standard orientation

|   |   |          |           |           |
|---|---|----------|-----------|-----------|
| 6 | 0 | 1.071996 | -0.012812 | -0.332282 |
| 1 | 0 | 1.023359 | 0.045039  | -1.425819 |
| 6 | 0 | 2.151316 | -1.036715 | 0.032678  |
| 1 | 0 | 1.916952 | -2.022764 | -0.371833 |
| 1 | 0 | 2.241858 | -1.135939 | 1.117216  |
| 1 | 0 | 3.127305 | -0.739243 | -0.354260 |
| 6 | 0 | 1.450613 | 1.375198  | 0.195296  |

|   |   |           |           |           |
|---|---|-----------|-----------|-----------|
| 1 | 0 | 0.741430  | 2.141584  | -0.116614 |
| 1 | 0 | 2.436020  | 1.673667  | -0.166125 |
| 1 | 0 | 1.485015  | 1.376656  | 1.287887  |
| 6 | 0 | -0.304462 | -0.478471 | 0.168271  |
| 1 | 0 | -0.457042 | -1.513826 | -0.153000 |
| 1 | 0 | -0.293506 | -0.501268 | 1.264165  |
| 6 | 0 | -1.495295 | 0.356029  | -0.307823 |
| 1 | 0 | -1.399469 | 1.383061  | 0.051014  |
| 1 | 0 | -1.479952 | 0.411427  | -1.400626 |
| 6 | 0 | -2.838553 | -0.210332 | 0.152209  |
| 1 | 0 | -2.989039 | -1.224207 | -0.224005 |
| 1 | 0 | -2.895944 | -0.252293 | 1.241708  |
| 1 | 0 | -3.670670 | 0.400720  | -0.199796 |

Compound **24**: (CH<sub>3</sub>)<sub>2</sub>CH(CH<sub>2</sub>)<sub>3</sub>CH<sub>3</sub>  
Symmetry C<sub>1</sub>  
energy  $E = -276.4927327$  a.u.  
Standard orientation

|   |   |           |           |           |
|---|---|-----------|-----------|-----------|
| 6 | 0 | -1.641597 | 0.030984  | -0.342312 |
| 1 | 0 | -1.545445 | 0.112775  | -1.431169 |
| 6 | 0 | -2.816460 | -0.906571 | -0.047225 |
| 1 | 0 | -3.749044 | -0.514340 | -0.456163 |
| 1 | 0 | -2.652738 | -1.896605 | -0.475998 |
| 1 | 0 | -2.953762 | -1.030073 | 1.029942  |
| 6 | 0 | -1.922364 | 1.432157  | 0.210570  |
| 1 | 0 | -2.860372 | 1.826165  | -0.184061 |
| 1 | 0 | -1.135036 | 2.140140  | -0.046824 |
| 1 | 0 | -2.006679 | 1.407685  | 1.300192  |
| 6 | 0 | -0.329577 | -0.562475 | 0.195347  |
| 1 | 0 | -0.388847 | -0.616496 | 1.288500  |
| 1 | 0 | -0.249761 | -1.596927 | -0.153807 |
| 6 | 0 | 0.943737  | 0.184851  | -0.206394 |
| 1 | 0 | 0.974847  | 0.284056  | -1.296808 |
| 1 | 0 | 0.923692  | 1.202771  | 0.191547  |
| 6 | 0 | 2.223983  | -0.504688 | 0.269671  |
| 1 | 0 | 2.256815  | -1.520758 | -0.134356 |
| 1 | 0 | 2.190608  | -0.612612 | 1.357838  |
| 6 | 0 | 3.496105  | 0.242554  | -0.128244 |
| 1 | 0 | 3.509267  | 1.249967  | 0.292428  |
| 1 | 0 | 3.573815  | 0.338122  | -1.213127 |
| 1 | 0 | 4.389674  | -0.274748 | 0.223384  |

Compound **25**: H<sub>3</sub>C<sup>+</sup>  
Symmetry C<sub>3v</sub>  
energy  $E = -39.4942274$  a.u.  
Standard orientation

|   |   |           |           |           |
|---|---|-----------|-----------|-----------|
| 6 | 0 | 0.000000  | 0.000000  | 0.000002  |
| 1 | 0 | 0.000000  | 1.090611  | -0.000004 |
| 1 | 0 | 0.944497  | -0.545306 | -0.000004 |
| 1 | 0 | -0.944497 | -0.545306 | -0.000004 |

Compound **26**: CH<sub>3</sub>C<sup>+</sup>H<sub>2</sub>  
Symmetry C<sub>s</sub>  
energy  $E = -78.8905678$  a.u.  
Standard orientation

|   |   |           |          |          |
|---|---|-----------|----------|----------|
| 6 | 0 | -0.064110 | 0.688210 | 0.000000 |
| 1 | 0 | -0.072782 | 1.243215 | 0.932457 |

|   |   |           |           |           |
|---|---|-----------|-----------|-----------|
| 1 | 0 | -0.072782 | 1.243215  | -0.932457 |
| 6 | 0 | -0.064110 | -0.688210 | 0.000000  |
| 1 | 0 | -0.072783 | -1.243214 | 0.932457  |
| 1 | 0 | 1.060452  | -0.000001 | 0.000000  |
| 1 | 0 | -0.072783 | -1.243214 | -0.932457 |

Compound **27**: CH<sub>3</sub>CH<sub>2</sub>C<sup>+</sup>H<sub>2</sub>  
Symmetry C<sub>s</sub>  
energy  $E = -118.2376403$  a.u.  
Standard orientation

|   |   |           |           |           |
|---|---|-----------|-----------|-----------|
| 6 | 0 | 0.000000  | 0.897191  | 0.000000  |
| 1 | 0 | 0.249432  | 1.406255  | 0.919802  |
| 1 | 0 | 0.249432  | 1.406255  | -0.919802 |
| 6 | 0 | 0.811234  | -0.628973 | 0.000000  |
| 1 | 0 | 1.375984  | -0.577683 | 0.922625  |
| 1 | 0 | 1.375984  | -0.577683 | -0.922625 |
| 1 | 0 | 0.305039  | -1.605513 | 0.000000  |
| 6 | 0 | -0.944838 | -0.117440 | 0.000000  |
| 1 | 0 | -1.377123 | -0.478150 | 0.924466  |
| 1 | 0 | -1.377123 | -0.478150 | -0.924466 |

Compound **28**: (CH<sub>3</sub>)<sub>2</sub>CHC<sup>+</sup>H<sub>2</sub>  
Symmetry C<sub>1</sub>  
energy  $E = -157.5874653$  a.u.  
Standard orientation

|   |   |           |           |           |
|---|---|-----------|-----------|-----------|
| 6 | 0 | -0.645654 | 0.747959  | -0.239830 |
| 1 | 0 | -0.543113 | 0.882597  | -1.312328 |
| 1 | 0 | -1.172969 | 1.563073  | 0.248472  |
| 6 | 0 | 0.529049  | 0.318316  | 0.433129  |
| 1 | 0 | 0.545859  | 0.424163  | 1.516965  |
| 6 | 0 | -1.512463 | -0.595847 | 0.027373  |
| 1 | 0 | -1.086021 | -1.455442 | -0.479282 |
| 1 | 0 | -1.650074 | -0.797593 | 1.085885  |
| 1 | 0 | -2.475959 | -0.347752 | -0.416030 |
| 6 | 0 | 1.677203  | -0.308679 | -0.179158 |
| 1 | 0 | 2.478375  | 0.448376  | -0.054683 |
| 1 | 0 | 1.569485  | -0.527819 | -1.237330 |
| 1 | 0 | 2.045611  | -1.160098 | 0.399250  |

Compound **29**: (CH<sub>3</sub>)<sub>3</sub>CC<sup>+</sup>H<sub>2</sub>  
Symmetry C<sub>1</sub>  
energy  $E = -196.9399794$  a.u.  
Standard orientation

|   |   |           |           |           |
|---|---|-----------|-----------|-----------|
| 6 | 0 | -0.852911 | -0.111921 | 0.732602  |
| 1 | 0 | -1.064772 | 0.713692  | 1.411046  |
| 1 | 0 | -1.011118 | -1.071652 | 1.220104  |
| 6 | 0 | 0.473257  | 0.000616  | 0.149778  |
| 6 | 0 | -1.855058 | 0.001601  | -0.485944 |
| 1 | 0 | -1.763419 | 0.959101  | -0.991756 |
| 1 | 0 | -2.853054 | -0.079492 | -0.061180 |
| 1 | 0 | -1.708433 | -0.806016 | -1.198506 |
| 6 | 0 | 1.060857  | 1.314857  | -0.102031 |
| 1 | 0 | 1.915970  | 1.401209  | 0.588948  |
| 1 | 0 | 1.511995  | 1.369067  | -1.095735 |
| 1 | 0 | 0.386106  | 2.145125  | 0.081484  |
| 6 | 0 | 1.224772  | -1.207742 | -0.185782 |
| 1 | 0 | 1.683855  | -1.527043 | 0.766457  |

|   |   |          |           |           |
|---|---|----------|-----------|-----------|
| 1 | 0 | 2.025053 | -1.053805 | -0.904031 |
| 1 | 0 | 0.572319 | -2.034653 | -0.468575 |

Compound **30**: (CH<sub>3</sub>)<sub>2</sub>C<sup>+</sup>H  
Symmetry C<sub>2</sub>  
energy E = -118.2539123 a.u.  
Standard orientation

|   |   |           |           |           |
|---|---|-----------|-----------|-----------|
| 6 | 0 | 0.000000  | 0.000000  | 0.451823  |
| 1 | 0 | 0.000000  | 0.000000  | 1.541900  |
| 6 | 0 | 0.000000  | 1.277873  | -0.197414 |
| 1 | 0 | -1.035947 | 1.642690  | -0.003286 |
| 1 | 0 | 0.162796  | 1.257899  | -1.270705 |
| 1 | 0 | 0.608421  | 2.017445  | 0.332058  |
| 6 | 0 | 0.000000  | -1.277873 | -0.197414 |
| 1 | 0 | 1.035947  | -1.642690 | -0.003286 |
| 1 | 0 | -0.162796 | -1.257899 | -1.270705 |
| 1 | 0 | -0.608421 | -2.017445 | 0.332058  |

Compound **31**: CH<sub>3</sub>CH<sub>2</sub>C<sup>+</sup>HCH<sub>3</sub>  
Symmetry C<sub>1</sub>  
energy E = -157.5867293 a.u.  
Standard orientation

|   |   |           |           |           |
|---|---|-----------|-----------|-----------|
| 6 | 0 | -0.597922 | -0.372526 | -0.133580 |
| 1 | 0 | -0.452372 | -1.423226 | -0.387732 |
| 6 | 0 | -1.951305 | 0.059178  | 0.112242  |
| 1 | 0 | -2.195921 | -0.419541 | 1.084209  |
| 1 | 0 | -2.081169 | 1.132649  | 0.213873  |
| 1 | 0 | -2.665675 | -0.399848 | -0.576627 |
| 6 | 0 | 0.562372  | 0.457246  | -0.128531 |
| 1 | 0 | 0.390846  | 1.439521  | 0.313252  |
| 1 | 0 | 0.474887  | 0.645017  | -1.245309 |
| 6 | 0 | 1.935740  | -0.156335 | 0.141574  |
| 1 | 0 | 2.060946  | -0.309202 | 1.212375  |
| 1 | 0 | 2.060124  | -1.111267 | -0.366544 |
| 1 | 0 | 2.715027  | 0.520514  | -0.197729 |

Compound **32**: (CH<sub>3</sub>)<sub>2</sub>CHC<sup>+</sup>HCH<sub>3</sub>  
Symmetry C<sub>1</sub>  
energy E = -196.9216377 a.u.  
Standard orientation

|   |   |           |           |           |
|---|---|-----------|-----------|-----------|
| 6 | 0 | 0.608998  | -0.367371 | 0.379704  |
| 1 | 0 | 0.451038  | -0.550398 | 1.439334  |
| 6 | 0 | 1.996597  | -0.421462 | -0.109030 |
| 1 | 0 | 2.102442  | -0.123105 | -1.148987 |
| 1 | 0 | 2.683789  | 0.130694  | 0.531605  |
| 1 | 0 | 2.289851  | -1.477102 | -0.023469 |
| 6 | 0 | -0.534708 | -0.173260 | -0.406213 |
| 1 | 0 | -0.379205 | -0.192354 | -1.480168 |
| 6 | 0 | -1.901239 | -0.613488 | 0.058084  |
| 1 | 0 | -2.039252 | -1.664135 | -0.197920 |
| 1 | 0 | -2.021367 | -0.505174 | 1.135500  |
| 1 | 0 | -2.681459 | -0.044874 | -0.444019 |
| 6 | 0 | -0.161927 | 1.428089  | 0.044879  |
| 1 | 0 | 0.404463  | 1.880312  | -0.757887 |
| 1 | 0 | -1.176980 | 1.806167  | 0.136388  |
| 1 | 0 | 0.320358  | 1.624923  | 1.005078  |

Compound **33**: (CH<sub>3</sub>)<sub>3</sub>CC<sup>+</sup>HCH<sub>3</sub>  
Symmetry C<sub>1</sub>  
energy  $E = -236.2700082$  a.u.  
Standard orientation

|   |   |           |           |           |
|---|---|-----------|-----------|-----------|
| 6 | 0 | -0.669180 | -0.282559 | -0.417256 |
| 1 | 0 | -0.654808 | -0.907723 | -1.312420 |
| 6 | 0 | -1.720797 | 0.818813  | -0.526293 |
| 1 | 0 | -1.863293 | 1.353468  | 0.411568  |
| 1 | 0 | -1.461425 | 1.538852  | -1.301684 |
| 1 | 0 | -2.675261 | 0.370507  | -0.795032 |
| 6 | 0 | 0.694916  | 0.107610  | -0.089571 |
| 6 | 0 | 1.815543  | -0.739763 | -0.502786 |
| 1 | 0 | 1.517705  | -1.680433 | -0.955571 |
| 1 | 0 | 2.373320  | -0.155207 | -1.252537 |
| 1 | 0 | 2.528582  | -0.889556 | 0.311064  |
| 6 | 0 | 0.975540  | 1.338336  | 0.651094  |
| 1 | 0 | 0.207436  | 1.559180  | 1.392784  |
| 1 | 0 | 1.971515  | 1.374756  | 1.081798  |
| 1 | 0 | 0.887427  | 2.154459  | -0.084993 |
| 6 | 0 | -1.008213 | -1.275640 | 0.780368  |
| 1 | 0 | -0.319201 | -2.113778 | 0.841714  |
| 1 | 0 | -1.035362 | -0.748562 | 1.731091  |
| 1 | 0 | -2.003492 | -1.656742 | 0.558882  |

Compound **34**: (CH<sub>3</sub>)<sub>3</sub>C<sup>+</sup>  
Symmetry C<sub>1</sub>  
energy  $E = -157.6094446$  a.u.  
Standard orientation

|   |   |           |           |           |
|---|---|-----------|-----------|-----------|
| 6 | 0 | -0.002204 | -0.000237 | -0.005383 |
| 6 | 0 | 0.992254  | -1.067584 | -0.008699 |
| 1 | 0 | 1.492337  | -1.033415 | 0.972915  |
| 1 | 0 | 1.797888  | -0.836142 | -0.713801 |
| 1 | 0 | 0.588860  | -2.060822 | -0.176052 |
| 6 | 0 | 0.428343  | 1.391674  | 0.014457  |
| 1 | 0 | 1.478616  | 1.535523  | 0.250514  |
| 1 | 0 | -0.226685 | 2.011692  | 0.630529  |
| 1 | 0 | 0.253662  | 1.754471  | -1.015183 |
| 6 | 0 | -1.423586 | -0.323618 | -0.010236 |
| 1 | 0 | -2.079107 | 0.532168  | -0.138408 |
| 1 | 0 | -1.644037 | -1.122184 | -0.723855 |
| 1 | 0 | -1.630374 | -0.782701 | 0.972511  |

Compound **35**: CH<sub>3</sub>CH<sub>2</sub>C<sup>+</sup>(CH<sub>3</sub>)<sub>2</sub>  
Symmetry C<sub>1</sub>  
energy  $E = -196.9401512$  a.u.  
Standard orientation

|   |   |           |           |           |
|---|---|-----------|-----------|-----------|
| 6 | 0 | 0.530990  | -0.000863 | -0.007060 |
| 6 | 0 | 1.808717  | -0.710332 | 0.015809  |
| 1 | 0 | 2.330957  | -0.424498 | 0.940742  |
| 1 | 0 | 1.724160  | -1.791030 | -0.041290 |
| 1 | 0 | 2.457485  | -0.323039 | -0.778495 |
| 6 | 0 | 0.519631  | 1.456411  | -0.008121 |
| 1 | 0 | 1.503569  | 1.912840  | 0.008895  |
| 1 | 0 | -0.049990 | 1.800969  | -0.882240 |
| 1 | 0 | -0.088232 | 1.806600  | 0.836638  |
| 6 | 0 | -0.713103 | -0.766702 | -0.030859 |
| 1 | 0 | -0.612422 | -1.535055 | 0.752639  |

|   |   |           |           |           |
|---|---|-----------|-----------|-----------|
| 1 | 0 | -0.621214 | -1.392266 | -0.938511 |
| 6 | 0 | -2.052055 | -0.048764 | 0.026399  |
| 1 | 0 | -2.166012 | 0.518022  | 0.949987  |
| 1 | 0 | -2.187851 | 0.629535  | -0.815058 |
| 1 | 0 | -2.855532 | -0.780580 | -0.010320 |

Compound **36**: (CH<sub>3</sub>)<sub>2</sub>CHC<sup>+</sup>(CH<sub>3</sub>)<sub>2</sub>  
Symmetry C<sub>1</sub>  
energy  $E = -236.2700082$  a.u.  
Standard orientation

|   |   |           |           |           |
|---|---|-----------|-----------|-----------|
| 6 | 0 | 0.694917  | 0.107613  | -0.089571 |
| 6 | 0 | 0.975533  | 1.338335  | 0.651096  |
| 1 | 0 | 1.971509  | 1.374768  | 1.081797  |
| 1 | 0 | 0.887407  | 2.154458  | -0.084991 |
| 1 | 0 | 0.207426  | 1.559177  | 1.392784  |
| 6 | 0 | 1.815548  | -0.739758 | -0.502785 |
| 1 | 0 | 2.528580  | -0.889555 | 0.311068  |
| 1 | 0 | 1.517710  | -1.680426 | -0.955574 |
| 1 | 0 | 2.373326  | -0.155203 | -1.252536 |
| 6 | 0 | -0.669179 | -0.282561 | -0.417257 |
| 1 | 0 | -0.654805 | -0.907727 | -1.312420 |
| 6 | 0 | -1.008210 | -1.275641 | 0.780368  |
| 1 | 0 | -2.003487 | -1.656750 | 0.558882  |
| 1 | 0 | -0.319191 | -2.113774 | 0.841716  |
| 1 | 0 | -1.035364 | -0.748562 | 1.731091  |
| 6 | 0 | -1.720796 | 0.818809  | -0.526295 |
| 1 | 0 | -1.863303 | 1.353457  | 0.411569  |
| 1 | 0 | -1.461423 | 1.538855  | -1.301680 |
| 1 | 0 | -2.675257 | 0.370502  | -0.795044 |

Compound **37**: (CH<sub>3</sub>)<sub>3</sub>CC<sup>+</sup>(CH<sub>3</sub>)<sub>2</sub>  
Symmetry C<sub>1</sub>  
energy  $E = -275.5958819$  a.u.  
Standard orientation

|   |   |           |           |           |
|---|---|-----------|-----------|-----------|
| 6 | 0 | -0.848508 | 0.005958  | -0.078007 |
| 6 | 0 | -1.628735 | -1.235100 | -0.090714 |
| 1 | 0 | -2.522622 | -1.155552 | 0.528276  |
| 1 | 0 | -2.005353 | -1.322132 | -1.124446 |
| 1 | 0 | -1.066961 | -2.135086 | 0.126537  |
| 6 | 0 | -1.600460 | 1.267669  | -0.095511 |
| 1 | 0 | -2.659976 | 1.144757  | 0.104150  |
| 1 | 0 | -1.163674 | 2.014393  | 0.568283  |
| 1 | 0 | -1.473802 | 1.693601  | -1.102254 |
| 6 | 0 | 0.616272  | 0.000998  | -0.047509 |
| 6 | 0 | 0.812336  | -0.152774 | 1.534165  |
| 1 | 0 | 1.893488  | -0.147132 | 1.669257  |
| 1 | 0 | 0.388985  | 0.681017  | 2.088897  |
| 1 | 0 | 0.416932  | -1.091318 | 1.913253  |
| 6 | 0 | 1.272617  | -1.207738 | -0.742641 |
| 1 | 0 | 0.944664  | -2.165598 | -0.347723 |
| 1 | 0 | 1.080732  | -1.188330 | -1.815002 |
| 1 | 0 | 2.348991  | -1.147330 | -0.595813 |
| 6 | 0 | 1.279745  | 1.308461  | -0.503651 |
| 1 | 0 | 1.087290  | 1.495972  | -1.560189 |
| 1 | 0 | 0.955126  | 2.176306  | 0.066134  |
| 1 | 0 | 2.356574  | 1.221587  | -0.376153 |

Compound **38**: CH<sub>3</sub>OH  
 Symmetry C<sub>s</sub>  
 energy  $E = -115.7743176$  a.u.  
 Standard orientation

|   |   |           |           |           |
|---|---|-----------|-----------|-----------|
| 6 | 0 | -0.046432 | 0.664807  | 0.000000  |
| 1 | 0 | 0.438471  | 1.075495  | 0.890506  |
| 1 | 0 | 0.438471  | 1.075495  | -0.890506 |
| 1 | 0 | -1.087885 | 0.979086  | 0.000000  |
| 8 | 0 | -0.046432 | -0.756172 | 0.000000  |
| 1 | 0 | 0.860988  | -1.069539 | 0.000000  |

Compound **39**: CH<sub>3</sub>SH  
 Symmetry C<sub>s</sub>  
 energy  $E = -438.7536229$  a.u.  
 Standard orientation

|    |   |           |           |           |
|----|---|-----------|-----------|-----------|
| 6  | 0 | 0.047843  | 1.157308  | 0.000000  |
| 1  | 0 | 1.092597  | 1.459044  | 0.000000  |
| 1  | 0 | -0.430770 | 1.551802  | 0.892164  |
| 1  | 0 | -0.430770 | 1.551802  | -0.892164 |
| 16 | 0 | 0.047843  | -0.666819 | 0.000000  |
| 1  | 0 | -1.283610 | -0.837392 | 0.000000  |

Compound **40**: CH<sub>3</sub>SeH  
 Symmetry C<sub>s</sub>  
 energy  $E = -2442.0836083$  a.u.  
 Standard orientation

|    |   |           |           |           |
|----|---|-----------|-----------|-----------|
| 6  | 0 | 0.031553  | 1.546876  | 0.000000  |
| 34 | 0 | 0.031553  | -0.423773 | 0.000000  |
| 1  | 0 | -1.432546 | -0.563131 | 0.000000  |
| 1  | 0 | -0.453229 | 1.923810  | 0.894191  |
| 1  | 0 | -0.453229 | 1.923810  | -0.894191 |
| 1  | 0 | 1.076890  | 1.842548  | 0.000000  |

Compound **41**: CH<sub>3</sub>SSCH<sub>3</sub>  
 Symmetry C<sub>2</sub>  
 energy  $E = -876.3114452$  a.u.  
 Standard orientation

|    |   |           |           |           |
|----|---|-----------|-----------|-----------|
| 6  | 0 | 0.966120  | 1.648448  | 0.788556  |
| 1  | 0 | 0.782868  | 1.232418  | 1.775956  |
| 1  | 0 | 0.228330  | 2.411204  | 0.554989  |
| 1  | 0 | 1.963302  | 2.088181  | 0.765415  |
| 16 | 0 | 0.966120  | 0.347540  | -0.489231 |
| 16 | 0 | -0.966120 | -0.347540 | -0.489231 |
| 6  | 0 | -0.966120 | -1.648448 | 0.788556  |
| 1  | 0 | -0.782868 | -1.232418 | 1.775956  |
| 1  | 0 | -0.228330 | -2.411204 | 0.554989  |
| 1  | 0 | -1.963302 | -2.088181 | 0.765415  |

Compound **42**: CH<sub>3</sub>F  
 Symmetry C<sub>3v</sub>  
 energy  $E = -139.8002847$  a.u.  
 Standard orientation

|   |   |           |          |           |
|---|---|-----------|----------|-----------|
| 6 | 0 | 0.000000  | 0.000000 | -0.636070 |
| 9 | 0 | 0.000000  | 0.000000 | 0.752737  |
| 1 | 0 | 1.031653  | 0.000000 | -0.986072 |
| 1 | 0 | -0.515827 | 0.893438 | -0.986072 |



1            0            -0.515827    -0.893438    -0.986072

Compound    **43:** CH<sub>3</sub>Cl

Symmetry    C<sub>3v</sub>

energy       E = -500.1598382 a.u.

Standard orientation

|    |   |           |           |           |
|----|---|-----------|-----------|-----------|
| 6  | 0 | 0.000000  | 0.000000  | -1.133585 |
| 17 | 0 | 0.000000  | 0.000000  | 0.660275  |
| 1  | 0 | -1.029529 | 0.000000  | -1.474386 |
| 1  | 0 | 0.514764  | 0.891598  | -1.474386 |
| 1  | 0 | 0.514764  | -0.891598 | -1.474386 |

Compound    **44:** CH<sub>3</sub>Br

Symmetry    C<sub>3v</sub>

energy       E = -2614.0807337 a.u.

Standard orientation

|    |   |           |           |           |
|----|---|-----------|-----------|-----------|
| 6  | 0 | 0.000000  | 0.000000  | -1.535565 |
| 35 | 0 | 0.000000  | 0.000000  | 0.422953  |
| 1  | 0 | 0.000000  | 1.032294  | -1.863318 |
| 1  | 0 | -0.893993 | -0.516147 | -1.863318 |
| 1  | 0 | 0.893993  | -0.516147 | -1.863318 |

Compound    **45:** CH<sub>3</sub>I

Symmetry    C<sub>3v</sub>

energy       E = -6960.4728009 a.u.

Standard orientation

|    |   |           |           |           |
|----|---|-----------|-----------|-----------|
| 6  | 0 | 0.000000  | 0.000000  | -1.831482 |
| 53 | 0 | 0.000000  | 0.000000  | 0.329498  |
| 1  | 0 | 0.000000  | 1.032342  | -2.158165 |
| 1  | 0 | -0.894034 | -0.516171 | -2.158165 |
| 1  | 0 | 0.894034  | -0.516171 | -2.158165 |

Cf: The basis set of the Sapporo-TZP with diffuse functions of the 1s1p type (Sapporo-TZP + 1s1p) was employed for Iodine atom, implemented from Sapporo Basis Set Factory.<sup>Ref</sup>

<sup>Ref</sup>T. Noro, M. Sekiya and T. Koga, *Theor. Chem. Acc.*, 2012, **131**, 1124.

Compound    **46:** CH<sub>3</sub>C(=O)OCH<sub>3</sub>

Symmetry    C<sub>s</sub>

energy       E = -268.4952145 a.u.

Standard orientation

|   |   |           |           |           |
|---|---|-----------|-----------|-----------|
| 6 | 0 | 1.126869  | 1.492588  | 0.000000  |
| 1 | 0 | 1.754996  | 1.344233  | 0.877931  |
| 1 | 0 | 1.754996  | 1.344233  | -0.877931 |
| 1 | 0 | 0.720578  | 2.498624  | 0.000000  |
| 6 | 0 | 0.000000  | 0.495099  | 0.000000  |
| 8 | 0 | -1.173541 | 0.763356  | 0.000000  |
| 8 | 0 | 0.470706  | -0.768723 | 0.000000  |
| 6 | 0 | -0.518727 | -1.808865 | 0.000000  |
| 1 | 0 | -1.146688 | -1.737895 | -0.885991 |
| 1 | 0 | -1.146688 | -1.737895 | 0.885991  |
| 1 | 0 | 0.036636  | -2.741299 | 0.000000  |

Compound    **47:** CH<sub>3</sub>CN

Symmetry    C<sub>3v</sub>

energy       E = -132.8056202 a.u.

|                      |   |           |           |           |
|----------------------|---|-----------|-----------|-----------|
| Standard orientation |   |           |           |           |
| 6                    | 0 | 0.000000  | 0.000000  | -1.174036 |
| 1                    | 0 | 0.000000  | 1.022326  | -1.549601 |
| 1                    | 0 | -0.885360 | -0.511163 | -1.549601 |
| 1                    | 0 | 0.885360  | -0.511163 | -1.549601 |
| 6                    | 0 | 0.000000  | 0.000000  | 0.280619  |
| 7                    | 0 | 0.000000  | 0.000000  | 1.429901  |

Compound **48**: CH<sub>3</sub>NH<sub>2</sub>  
Symmetry C<sub>s</sub>  
energy E = -95.9014753 a.u.

|                      |   |           |           |           |
|----------------------|---|-----------|-----------|-----------|
| Standard orientation |   |           |           |           |
| 6                    | 0 | -0.049039 | 0.706320  | 0.000000  |
| 1                    | 0 | -0.587090 | 1.065154  | 0.877309  |
| 1                    | 0 | -0.587090 | 1.065154  | -0.877309 |
| 1                    | 0 | 0.944853  | 1.170640  | 0.000000  |
| 7                    | 0 | -0.049039 | -0.757196 | 0.000000  |
| 1                    | 0 | 0.433415  | -1.119248 | 0.812978  |
| 1                    | 0 | 0.433415  | -1.119248 | -0.812978 |

Compound **49**: CH<sub>3</sub>NO<sub>2</sub>  
Symmetry C<sub>s</sub>  
energy E = -245.1096821 a.u.

|                      |   |           |           |           |
|----------------------|---|-----------|-----------|-----------|
| Standard orientation |   |           |           |           |
| 6                    | 0 | 0.000236  | -1.323947 | 0.000000  |
| 1                    | 0 | -0.491705 | -1.663804 | 0.903474  |
| 1                    | 0 | 1.044526  | -1.626712 | 0.000000  |
| 1                    | 0 | -0.491705 | -1.663804 | -0.903474 |
| 7                    | 0 | -0.009474 | 0.174306  | 0.000000  |
| 8                    | 0 | 0.000236  | 0.729866  | 1.083481  |
| 8                    | 0 | 0.000236  | 0.729866  | -1.083481 |

Compound **50**: CH<sub>3</sub>CH<sub>2</sub>OH  
Symmetry C<sub>s</sub>  
energy E = -155.106985 a.u.

|                      |   |           |           |           |
|----------------------|---|-----------|-----------|-----------|
| Standard orientation |   |           |           |           |
| 6                    | 0 | -1.176718 | -0.399986 | 0.000000  |
| 1                    | 0 | -1.152216 | -1.037957 | 0.883327  |
| 1                    | 0 | -1.152216 | -1.037957 | -0.883327 |
| 1                    | 0 | -2.115220 | 0.155476  | 0.000000  |
| 6                    | 0 | 0.000000  | 0.553216  | 0.000000  |
| 8                    | 0 | 1.199561  | -0.220669 | 0.000000  |
| 1                    | 0 | 1.956530  | 0.370327  | 0.000000  |
| 1                    | 0 | -0.036528 | 1.198039  | 0.885102  |
| 1                    | 0 | -0.036528 | 1.198039  | -0.885102 |

Compound **51**: H<sub>2</sub>C=CH<sub>2</sub>  
Symmetry D<sub>2h</sub>  
energy E = -78.6220932 a.u.

|                      |   |          |           |           |
|----------------------|---|----------|-----------|-----------|
| Standard orientation |   |          |           |           |
| 6                    | 0 | 0.000000 | 0.000000  | 0.662352  |
| 6                    | 0 | 0.000000 | 0.000000  | -0.662352 |
| 1                    | 0 | 0.000000 | 0.920632  | 1.231614  |
| 1                    | 0 | 0.000000 | -0.920632 | 1.231614  |
| 1                    | 0 | 0.000000 | 0.920632  | -1.231614 |
| 1                    | 0 | 0.000000 | -0.920632 | -1.231614 |

Compound **52: HC≡CH**  
Symmetry  $D_{\infty h}$   
energy  $E = -77.3623376$  a.u.  
Standard orientation

|   |   |          |          |           |
|---|---|----------|----------|-----------|
| 6 | 0 | 0.000000 | 0.000000 | 0.598143  |
| 6 | 0 | 0.000000 | 0.000000 | -0.598143 |
| 1 | 0 | 0.000000 | 0.000000 | 1.659887  |
| 1 | 0 | 0.000000 | 0.000000 | -1.659887 |

Compound **53: C<sub>6</sub>H<sub>6</sub>**  
Symmetry  $D_{6h}$   
energy  $E = -232.3293476$  a.u.  
Standard orientation

|   |   |           |           |          |
|---|---|-----------|-----------|----------|
| 6 | 0 | 0.000000  | 1.390962  | 0.000000 |
| 6 | 0 | 1.204608  | 0.695481  | 0.000000 |
| 6 | 0 | 1.204608  | -0.695481 | 0.000000 |
| 6 | 0 | 0.000000  | -1.390962 | 0.000000 |
| 6 | 0 | -1.204608 | -0.695481 | 0.000000 |
| 6 | 0 | -1.204608 | 0.695481  | 0.000000 |
| 1 | 0 | 0.000000  | 2.472877  | 0.000000 |
| 1 | 0 | 2.141574  | 1.236438  | 0.000000 |
| 1 | 0 | 2.141574  | -1.236438 | 0.000000 |
| 1 | 0 | 0.000000  | -2.472877 | 0.000000 |
| 1 | 0 | -2.141574 | -1.236438 | 0.000000 |
| 1 | 0 | -2.141574 | 1.236438  | 0.000000 |

Compound **54: C<sub>6</sub>H<sub>5</sub>OH**  
Symmetry  $C_s$   
energy  $E = -307.5829283$  a.u.  
Standard orientation

|   |   |           |           |          |
|---|---|-----------|-----------|----------|
| 6 | 0 | 1.215737  | -1.135690 | 0.000000 |
| 6 | 0 | 1.212675  | 0.251937  | 0.000000 |
| 6 | 0 | 0.000000  | 0.936403  | 0.000000 |
| 6 | 0 | -1.200396 | 0.230572  | 0.000000 |
| 6 | 0 | -1.183473 | -1.159574 | 0.000000 |
| 6 | 0 | 0.021631  | -1.851025 | 0.000000 |
| 1 | 0 | 2.160836  | -1.662262 | 0.000000 |
| 1 | 0 | 2.134207  | 0.816856  | 0.000000 |
| 1 | 0 | -2.142818 | 0.765700  | 0.000000 |
| 1 | 0 | -2.120198 | -1.700802 | 0.000000 |
| 1 | 0 | 0.031424  | -2.931808 | 0.000000 |
| 8 | 0 | 0.047984  | 2.302030  | 0.000000 |
| 1 | 0 | -0.844358 | 2.660331  | 0.000000 |

Compound **55: HC(=O)H**  
Symmetry  $C_{2v}$   
energy  $E = -114.5499452$  a.u.  
Standard orientation

|   |   |          |           |           |
|---|---|----------|-----------|-----------|
| 6 | 0 | 0.000000 | 0.000000  | -0.526024 |
| 8 | 0 | 0.000000 | 0.000000  | 0.672428  |
| 1 | 0 | 0.000000 | 0.938212  | -1.111639 |
| 1 | 0 | 0.000000 | -0.938212 | -1.111639 |

Compound **56: HC(=O)OH**

Symmetry  $C_s$   
energy  $E = -189.8416527$  a.u.  
Standard orientation

|   |   |           |           |          |
|---|---|-----------|-----------|----------|
| 6 | 0 | 0.000000  | 0.420408  | 0.000000 |
| 8 | 0 | 1.157012  | 0.116930  | 0.000000 |
| 1 | 0 | -0.382893 | 1.447570  | 0.000000 |
| 8 | 0 | -1.026765 | -0.445362 | 0.000000 |
| 1 | 0 | -0.659085 | -1.342561 | 0.000000 |

## Appendix

### Procedure to draw the selected contributions from each $\psi_i$ to $\sigma^d$ and $\sigma^p$ and each $\psi_i \rightarrow \psi_a$ transition, using molecular orbitals

(The procedure, analyzing the output of Gaussian program, with the utility program, is explained, exemplified by CH<sub>4</sub>: The output format below is the same as that from the program.)

#### Output

SP: B3LYP/6-311++G(3df,3pd)

Number of Basis Functions = 121  
Number of Orbitals = 121  
Number of Atoms = 5  
Multiplicity = 1  
Number of Electrons = 10

---

#### Diamagnetic MO contribution

---

|     |           |           |           |
|-----|-----------|-----------|-----------|
| 1   | 200.27845 | 200.27845 | 200.27845 |
| 2   | 26.97198  | 26.97198  | 26.97198  |
| 3   | 0.81211   | 0.81211   | 10.10126  |
| 4   | 0.81211   | 10.10126  | 0.81211   |
| 5   | 10.10126  | 0.81211   | 0.81211   |
| SUM | 238.97591 | 238.97591 | 238.97591 |

---

#### Paramagnetic MO contribution

---

|           |           |           |           |
|-----------|-----------|-----------|-----------|
| OCC x OCC | 125.55119 | 125.55119 | 125.55119 |
| 1         | 0.00002   | 0.00002   | 0.00002   |
| 2         | 0.33164   | 0.33164   | 0.33164   |
| 3         | -87.47495 | -87.47495 | -0.59302  |
| 4         | -87.47495 | -0.59302  | -87.47495 |
| 5         | -0.59302  | -87.47495 | -87.47495 |
| SUM       | -49.66007 | -49.66007 | -49.66007 |

---

## Contributions from each $\psi_i \rightarrow \psi_a$ transition to $\sigma_i^P$

### Output

SP: B3LYP/6-311++G(3df,3pd)

Number of Basis Functions = 121  
 Number of Orbitals = 121  
 Number of Atoms = 5  
 Multiplicity = 1  
 Number of Electrons = 10

#### Diamagnetic MO contribution

|     |           |           |           |
|-----|-----------|-----------|-----------|
| 1   | 200.27845 | 200.27845 | 200.27845 |
| 2   | 26.97198  | 26.97198  | 26.97198  |
| 3   | 0.81211   | 0.81211   | 10.10126  |
| 4   | 0.81211   | 10.10126  | 0.81211   |
| 5   | 10.10126  | 0.81211   | 0.81211   |
| SUM | 238.97591 | 238.97591 | 238.97591 |

#### Paramagnetic MO contribution

| OCC-->OCC | 125.55119 | 125.55119     | 125.55119 |
|-----------|-----------|---------------|-----------|
| --        |           |               |           |
| 1--> 6    | 0.00000   | 0.00000       | 0.00000   |
| 1--> 7    | 0.00000   | 0.00000       | 0.00000   |
| 1--> 8    | 0.00000   | 0.00000       | 0.00000   |
| 1--> 9    | 0.00000   | 0.00000       | 0.00000   |
| 1--> 10   | 0.00000   | 0.00000       | 0.00000   |
| ---       |           | -- omitted -- | ---       |
| 1-->121   | 0.00000   | 0.00000       | 0.00000   |
| --        |           |               |           |
| 2--> 6    | 0.00000   | 0.00000       | 0.00000   |
| 2--> 7    | 0.00000   | 0.00000       | 0.00000   |
| 2--> 8    | 0.00000   | 0.00000       | 0.00000   |
| 2--> 9    | 0.00000   | 0.00000       | 0.00000   |
| 2--> 10   | 0.00000   | 0.00000       | 0.00000   |
| 2--> 11   | 0.00000   | 0.00000       | 0.00000   |
| 2--> 12   | 0.00000   | 0.00000       | 0.00000   |
| 2--> 13   | 0.00000   | 0.00000       | 0.00000   |
| 2--> 14   | 0.00000   | 0.00000       | 0.00000   |
| 2--> 15   | 0.00000   | 0.00000       | 0.00000   |
| 2--> 16   | 0.00000   | 0.00000       | 0.00000   |
| 2--> 17   | 0.00000   | 0.00000       | 0.00000   |
| 2--> 18   | 0.00000   | 0.00000       | 0.00000   |
| 2--> 19   | 0.00000   | 0.00000       | 0.00000   |
| 2--> 20   | 0.00000   | 0.00000       | 0.00000   |
| 2--> 21   | 0.00000   | 0.00000       | 0.00000   |
| 2--> 22   | 0.00000   | 0.00000       | 0.00000   |
| 2--> 23   | 0.00000   | 0.00000       | 0.00000   |
| 2--> 24   | 0.08601   | 0.00000       | 0.00000   |
| 2--> 25   | 0.00000   | 0.08601       | 0.00000   |
| 2--> 26   | 0.00000   | 0.00000       | 0.08601   |
| ---       |           | -- omitted -- | ---       |
| 2-->121   | 0.00000   | 0.00000       | 0.00000   |
| --        |           |               |           |
| 3--> 6    | 0.00000   | 0.00000       | 0.00000   |
| 3--> 7    | -10.57648 | 0.00000       | 0.00000   |

|         |           |               |           |
|---------|-----------|---------------|-----------|
| 3--> 8  | 0.00000   | 0.00000       | 0.00000   |
| 3--> 9  | 0.00000   | -10.57648     | 0.00000   |
| 3--> 10 | -0.81361  | 0.00000       | 0.00000   |
| 3--> 11 | 0.00000   | 0.00000       | 0.00000   |
| 3--> 12 | 0.00000   | -0.81361      | 0.00000   |
| ---     |           | -- omitted -- | ---       |
| 3-->121 | 0.00000   | 0.00000       | 0.00000   |
| --      |           |               |           |
| 4--> 6  | 0.00000   | 0.00000       | 0.00000   |
| 4--> 7  | 0.00000   | 0.00000       | 0.00000   |
| 4--> 8  | -10.57648 | 0.00000       | 0.00000   |
| 4--> 9  | 0.00000   | 0.00000       | -10.57648 |
| 4--> 10 | 0.00000   | 0.00000       | 0.00000   |
| 4--> 11 | -0.81361  | 0.00000       | 0.00000   |
| 4--> 12 | 0.00000   | 0.00000       | -0.81361  |
| 4--> 13 | 0.00000   | 0.00000       | 0.00000   |
| 4--> 14 | -33.27102 | 0.00000       | 0.00000   |
| 4--> 15 | 0.00000   | 0.00000       | 0.00000   |
| 4--> 16 | 0.00000   | 0.00000       | -33.27102 |
| 4--> 17 | 0.00000   | 0.00000       | 0.00000   |
| ---     |           | -- omitted -- | ---       |
| 4-->121 | 0.00000   | 0.00000       | 0.00000   |
| --      |           |               |           |
| 5--> 6  | 0.00000   | 0.00000       | 0.00000   |
| 5--> 7  | 0.00000   | 0.00000       | -10.57648 |
| 5--> 8  | 0.00000   | -10.57648     | 0.00000   |
| 5--> 9  | 0.00000   | 0.00000       | 0.00000   |
| 5--> 10 | 0.00000   | 0.00000       | -0.81361  |
| 5--> 11 | 0.00000   | -0.81361      | 0.00000   |
| 5--> 12 | 0.00000   | 0.00000       | 0.00000   |
| 5--> 13 | 0.00000   | 0.00000       | 0.00000   |
| 5--> 14 | 0.00000   | -33.27102     | 0.00000   |
| 5--> 15 | 0.00000   | 0.00000       | -33.27102 |
| 5--> 16 | 0.00000   | 0.00000       | 0.00000   |
| ---     |           | -- omitted -- | ---       |
| 5-->119 | 0.00000   | -0.67620      | 0.00000   |
| 5-->120 | 0.00000   | 0.00000       | 0.00000   |
| 5-->121 | 0.00000   | 0.00000       | 0.00000   |
| SUM     | -49.66007 | -49.66007     | -49.66007 |

## Drawing steps:

1. Selecting transitions in the above output terms, of which contributions are larger than a certain value.
2. Drawing the molecular orbitals in the selected transitions using GaussView with an isovalue of 0.04 au.
3. Completing the transition maps of interest, using the molecular orbitals drawn above.  
(See Figs. 6–13 in the text.)

**The input section of this utility program is as follows, although it is not shown in the Appendix:**

### Input

```
FChk file: CH4Td-B6G6NMR.FChk
CH4Td-B6G6NMR NMR B3LYP/6-311++G(3df,3pd) SCF=(Direct,Tight) IOp(10/21=11)
IOp(10/33=1) IOp(10/75=1) 6D 10F FChk=All POP=Full GFInput
```
